# Supplementary material for: Transitioning to Plant-based Diets: Exploring the Environmental Nutrition Performance of 24 Composite Diet Scenarios
Source: Research Square preprint supplement (doi:10.21203/rs.3.rs-2750008/v1), 2023-04-27
Supplement: Supplementary file 1 [file 2dc5ed181a1f2c262d1d8bf3.xlsx]

## Sheet: SD2-S1
Total emissions was calculated as the sum of emissions of single diets, assuming that till the point of preparation, the cycle of emission for each diet stands alone.
Emissions from single diet were estimated from the HENI environmental emission database for diets
TABLE 1: EMISSION CALCULATION FOR S1M1M2M3
		Characteristics of select foods
WWEIA Foodcode	Food Description	USDA Main Group	Food subgroup	HENI category	Main ingredient contributing to environmental impacts	RACC (g/serving)	Qty of Diet	Global warming, shorter term (kg CO2 eq/serving)			Global warming, long term (kg CO2 eq/serving)			Land occupation, biodiversity (ha-yr arable/serving)			Fossil energy use (MJ/serving)			Mineral resources use (kg deprived/serving)			Freshwater acidification (kg SO2 eq/serving)			Terrestrial acidification (kg SO2 eq/serving)			Freshwater eutrophication (kg PO4---P- eq/serving)			Marine eutrophication (kg N eq/serving)			Freshwater ecotoxicity (CTUe/serving)			Ionizing radiation (Bq C-14 eq/serving)			Ozone Layer Depletion (kg CFC-11 eq/serving)			Water use (m3/serving)			Photochemical oxidant formation (DALYs/serving)
								HH, EQ			HH, EQ			EQ									EQ			EQ			EQ			EQ			EQ			HH, EQ			HH, EQ						HH
								Mean	Factor	Future Food	Mean	Factor	FF	Mean	Factor	FF	Mean	Factor	FF	Mean	Factor	FF	Mean	Factor	FF	Mean	Factor	FF	Mean	Factor	FF	Mean	Factor	FF	Mean	Factor	FF	Mean	Factor	FF	Mean	Factor	FF	Mean	Factor	FF	Mean	Factor	FF
11111000	Milk, whole	Milk and Dairy	Dairy	Milk	Dairy	244	8.34456	0.62952	0.00258	0.021529	0.40504	0.00166	0.013852	0.29768	0.00122	0.0101804	2.03496	0.00834	0.0695936	0.0027328	1.12e-05	9.34591e-05	0.00102724	4.21e-06	3.51306e-05	0.0026596	1.09e-05	9.09557e-05	0.00025376	1.04e-06	8.67834e-06	8.906e-05	3.65e-07	3.04576e-06	1.70312	0.00698	0.058245	3.172	0.013	0.108479	1.88856e-08	7.74e-11	6.45869e-10	0.0207888	8.52e-05	0.000710957	3.6844e-11	1.51e-13	1.26003e-12
21500100	Ground beef, cooked	Protein Foods	Beef	Red meat	Beef	85	2.78152	3.1705	0.0373	0.103751	2.227	0.0262	0.0728758	2.227	0.0262	0.0728758	15.13	0.178	0.495111	0.024225	0.000285	0.000792733	0.0081855	9.63e-05	0.00026786	0.02431	0.000286	0.000795515	0.002346	2.76e-05	7.677e-05	0.0008585	1.01e-05	2.80934e-05	9.605	0.113	0.314312	25.5	0.3	0.834456	1.2665e-07	1.49e-09	4.14447e-09	7.106e-05	8.36e-07	2.32535e-06	2.635e-10	3.1e-12	8.62271e-12
24144210	Chicken, drumstick, fried, no coating, skin eaten, NS as to type of fat added in cooking	Protein Foods	Poultry	Poultry	Poultry	85	3.75	0.44115	0.00519	0.0194625	0.41395	0.00487	0.0182625	0.73865	0.00869	0.0325875	3.9865	0.0469	0.175875	0.005406	6.36e-05	0.0002385	0.0016235	1.91e-05	7.1625e-05	0.0048365	5.69e-05	0.000213375	0.00069615	8.19e-06	3.07125e-05	0.00016405	1.93e-06	7.2375e-06	2.2015	0.0259	0.097125	4.352	0.0512	0.192	3.74e-08	4.4e-10	1.65e-09	0.02006	0.000236	0.000885	5.4655e-11	6.43e-13	2.41125e-12
25221405	Pork sausage	Protein Foods	Processed meat	Cured Meats/Poultry	Processed meat	55	1.39076	0.3905	0.0071	0.0098744	0.2761	0.00502	0.00698162	0.2354	0.00428	0.00595245	4.3615	0.0793	0.110287	0.0027445	4.99e-05	6.93989e-05	0.0009295	1.69e-05	2.35038e-05	0.0028435	5.17e-05	7.19023e-05	0.0002904	5.28e-06	7.34321e-06	0.0001848	3.36e-06	4.67295e-06	1.408	0.0256	0.0356035	22.605	0.411	0.571602	1.8205e-08	3.31e-10	4.60342e-10	0.0627	0.00114	0.00158547	3.1075e-11	5.65e-13	7.8578e-13
26137120	Salmon, baked or broiled, made with oil	Protein Foods	Seafood	Seafood	Seafood	85	1.39076	0.68255	0.00803	0.0111678	0.66555	0.00783	0.0108897	0.3995	0.0047	0.00653657	7.5905	0.0893	0.124195	0.005423	6.38e-05	8.87305e-05	0.0022015	2.59e-05	3.60207e-05	0.002856	3.36e-05	4.67295e-05	0.005474	6.44e-05	8.9565e-05	0.0006987	8.22e-06	1.1432e-05	2.8475	0.0335	0.0465905	9.095	0.107	0.148811	3.1535e-08	3.71e-10	5.15972e-10	0.0034765	4.09e-05	5.68821e-05	1.496e-10	1.76e-12	2.44774e-12
31103010	Egg, whole, boiled or poached	Protein Foods	Eggs	Eggs	Animal-based (other)	50	1.39076	0.3385	0.00677	0.00941545	0.3325	0.00665	0.00924856	0.37	0.0074	0.0102916	1.775	0.0355	0.049372	0.00765	0.000153	0.000212786	0.000755	1.51e-05	2.10005e-05	0.00177	3.54e-05	4.92329e-05	0.0002605	5.21e-06	7.24586e-06	5.9e-05	1.18e-06	1.6411e-06	2.425	0.0485	0.0674519	1.97	0.0394	0.054796	1.9e-08	3.8e-10	5.28489e-10	0.01105	0.000221	0.000307358	3.315e-11	6.63e-13	9.22074e-13
41104020	Pinto, calico, or red Mexican beans, dry, cooked, fat not added in cooking	Protein Foods	Legumes	Legumes and soy products	Plant-based, other	90	0	0.006975	7.75e-05	0	0.006795	7.55e-05	0	0.005319	5.91e-05	0	0.07803	0.000867	0	0.0003051	3.39e-06	0	3.753e-05	4.17e-07	0	5.76e-05	6.4e-07	0	8.289e-06	9.21e-08	0	2.304e-06	2.56e-08	0	0.03204	0.000356	0	0.1674	0.00186	0	3.402e-10	3.78e-12	0	0.005553	6.17e-05	0	2.781e-12	3.09e-14	0
42111200	Peanuts, dry roasted, salted	Protein Foods	Nuts and seeds	Nuts and seeds	Nuts and seeds	30	0	0.0717	0.00239	0	0.0702	0.00234	0	0.1803	0.00601	0	0.318	0.0106	0	0.001044	3.48e-05	0	0.0002184	7.28e-06	0	0.000657	2.19e-05	0	7.59e-05	2.53e-06	0	2.121e-05	7.07e-07	0	0.2655	0.00885	0	0.1431	0.00477	0	3.27e-09	1.09e-10	0	0.00525	0.000175	0	7.23e-12	2.41e-13	0
56203010	Oatmeal, cooked, regular, fat not added in cooking	Grains	Grains	Cooked Cereals	Plant-based, other	234	1.39076	0.046566	0.000199	0.000276761	0.045396	0.000194	0.000269807	0.194688	0.000832	0.00115711	0.233064	0.000996	0.0013852	0.00075348	3.22e-06	4.47825e-06	0.00016848	7.2e-07	1.00135e-06	0.0004446	1.9e-06	2.64244e-06	0.000125892	5.38e-07	7.48229e-07	1.40166e-05	5.99e-08	8.33065e-08	0.37206	0.00159	0.00221131	0.13221	0.000565	0.00078578	2.808e-09	1.2e-11	1.66891e-11	0.0106236	4.54e-05	6.31405e-05	5.967e-12	2.55e-14	3.54644e-14
56205008	Rice, white, cooked, fat not added in cooking	Grains	Grains	Cooked Grains	Plant-based, other	140	4.17228	0.2044	0.00146	0.00609153	0.11886	0.000849	0.00354227	0.1337	0.000955	0.00398453	0.8162	0.00583	0.0243244	0.003094	2.21e-05	9.22074e-05	0.0003094	2.21e-06	9.22074e-06	0.0004914	3.51e-06	1.46447e-05	0.0001582	1.13e-06	4.71468e-06	1.2278e-05	8.77e-08	3.65909e-07	2.198	0.0157	0.0655048	0.707	0.00505	0.02107	7.028e-09	5.02e-11	2.09448e-10	0.04326	0.000309	0.00128923	1.0934e-11	7.81e-14	3.25855e-13
63107010	Banana, raw	Fruit	Fruits	Fruits	Plant-based, other	140	5.56304	0.02772	0.000198	0.00110148	0.02646	0.000189	0.00105141	0.011676	8.34e-05	0.000463958	0.2996	0.00214	0.0119049	0.0011298	8.07e-06	4.48937e-05	0.0002352	1.68e-06	9.34591e-06	0.0009954	7.11e-06	3.95532e-05	5.95e-05	4.25e-07	2.36429e-06	3.248e-05	2.32e-07	1.29063e-06	0.2268	0.00162	0.00901213	0.1932	0.00138	0.007677	2.002e-09	1.43e-11	7.95515e-11	0.0336	0.00024	0.00133513	4.256e-12	3.04e-14	1.69116e-13
75113000	Lettuce, raw	Vegetables	Vegetables	Vegetables, excluding starchy	Plant-based, other	85	6.9538	0.030345	0.000357	0.00248251	0.029155	0.000343	0.00238515	0.016745	0.000197	0.0013699	0.26095	0.00307	0.0213482	0.00060605	7.13e-06	4.95806e-05	0.00011475	1.35e-06	9.38763e-06	0.00015215	1.79e-06	1.24473e-05	2.1335e-05	2.51e-07	1.7454e-06	4.4285e-06	5.21e-08	3.62293e-07	0.17	0.002	0.0139076	0.1343	0.00158	0.010987	2.9325e-09	3.45e-11	2.39906e-10	0.005372	6.32e-05	0.00043948	6.4175e-12	7.55e-14	5.25012e-13
83106000	Italian dressing, made with vinegar and oil	Fats and Oils	Fats and Oils	Oils	Plant-based, other	30	0.69538	0.093	0.0031	0.00215568	0.0918	0.00306	0.00212786	0.1746	0.00582	0.00404711	0.504	0.0168	0.0116824	0.000987	3.29e-05	2.2878e-05	0.0002271	7.57e-06	5.26403e-06	0.000564	1.88e-05	1.30731e-05	9.24e-05	3.08e-06	2.14177e-06	1.977e-05	6.59e-07	4.58255e-07	10.56	0.352	0.244774	0.516	0.0172	0.0119605	5.22e-09	1.74e-10	1.20996e-10	0.00693	0.000231	0.000160633	1.248e-11	4.16e-13	2.89278e-13
92552010	Fruit flavored drink, powdered, reconstituted, diet	Beverages, Nonalcoholic	Beverages, Nonalcoholic	Diet Beverages	Other	240	13.9076	0.000312	1.3e-06	1.80799e-05	0.0002976	1.24e-06	1.72454e-05	0.000468	1.95e-06	2.71198e-05	0.003144	1.31e-05	0.00018219	1.8072e-05	7.53e-08	1.04724e-06	9.36e-07	3.9e-09	5.42396e-08	2.0016e-06	8.34e-09	1.15989e-07	4.92e-07	2.05e-09	2.85106e-08	1.3128e-07	5.47e-10	7.60746e-09	0.003192	1.33e-05	0.000184971	0.002712	1.13e-05	0.000157156	2.712e-11	1.13e-13	1.57156e-12	3.264e-05	1.36e-07	1.89143e-06	3.36e-14	1.4e-16	1.94706e-15
		Emissions from Diet								0.187326			0.141504			0.149474			1.09526			0.00171069			0.000489415			0.00135019			0.000232058			5.86907e-05			0.954922			1.96278			8.6133e-09			0.0068375			1.77963e-11
TABLE 2: EMISSION CALCULATION FOR S2M1
		Characteristics of select foods
WWEIA Foodcode	Food Description	USDA Main Group	Food subgroup	HENI category	Main ingredient contributing to environmental impacts	RACC (g/serving)	Qty of Diet	Global warming, shorter term (kg CO2 eq/serving)			Global warming, long term (kg CO2 eq/serving)			Land occupation, biodiversity (ha-yr arable/serving)			Fossil energy use (MJ/serving)			Mineral resources use (kg deprived/serving)			Freshwater acidification (kg SO2 eq/serving)			Terrestrial acidification (kg SO2 eq/serving)			Freshwater eutrophication (kg PO4---P- eq/serving)			Marine eutrophication (kg N eq/serving)			Freshwater ecotoxicity (CTUe/serving)			Ionizing radiation (Bq C-14 eq/serving)			Ozone Layer Depletion (kg CFC-11 eq/serving)			Water use (m3/serving)			Photochemical oxidant formation (DALYs/serving)
								HH, EQ			HH, EQ			EQ									EQ			EQ			EQ			EQ			EQ			HH, EQ			HH, EQ						HH
								Mean	Factor	Future Food	Mean	Factor	FF	Mean	Factor	FF	Mean	Factor	FF	Mean	Factor	FF	Mean	Factor	FF	Mean	Factor	FF	Mean	Factor	FF	Mean	Factor	FF	Mean	Factor	FF	Mean	Factor	FF	Mean	Factor	FF	Mean	Factor	FF	Mean	Factor	FF
11111000	Milk, whole	Milk and Dairy	Dairy	Milk	Dairy	244	8.16294	0.62952	0.00258	0.0210604	0.40504	0.00166	0.0135505	0.29768	0.00122	0.00995878	2.03496	0.00834	0.0680789	0.0027328	1.12e-05	9.14249e-05	0.00102724	4.21e-06	3.4366e-05	0.0026596	1.09e-05	8.8976e-05	0.00025376	1.04e-06	8.48945e-06	8.906e-05	3.65e-07	2.97947e-06	1.70312	0.00698	0.0569773	3.172	0.013	0.106118	1.88856e-08	7.74e-11	6.31811e-10	0.0207888	8.52e-05	0.000695482	3.6844e-11	1.51e-13	1.2326e-12
21500100	Ground beef, cooked	Protein Foods	Beef	Red meat	Beef	85	2.87335	3.1705	0.0373	0.107176	2.227	0.0262	0.0752819	2.227	0.0262	0.0752819	15.13	0.178	0.511457	0.024225	0.000285	0.000818906	0.0081855	9.63e-05	0.000276704	0.02431	0.000286	0.000821779	0.002346	2.76e-05	7.93046e-05	0.0008585	1.01e-05	2.90209e-05	9.605	0.113	0.324689	25.5	0.3	0.862006	1.2665e-07	1.49e-09	4.2813e-09	7.106e-05	8.36e-07	2.40212e-06	2.635e-10	3.1e-12	8.9074e-12
24144210	Chicken, drumstick, fried, no coating, skin eaten, NS as to type of fat added in cooking	Protein Foods	Poultry	Poultry	Poultry	85	2.04074	0.44115	0.00519	0.0105914	0.41395	0.00487	0.00993839	0.73865	0.00869	0.017734	3.9865	0.0469	0.0957105	0.005406	6.36e-05	0.000129791	0.0016235	1.91e-05	3.89781e-05	0.0048365	5.69e-05	0.000116118	0.00069615	8.19e-06	1.67136e-05	0.00016405	1.93e-06	3.93862e-06	2.2015	0.0259	0.0528551	4.352	0.0512	0.104486	3.74e-08	4.4e-10	8.97924e-10	0.02006	0.000236	0.000481614	5.4655e-11	6.43e-13	1.31219e-12
25221405	Pork sausage	Protein Foods	Processed meat	Cured Meats/Poultry	Processed meat	55	0.816294	0.3905	0.0071	0.00579569	0.2761	0.00502	0.00409779	0.2354	0.00428	0.00349374	4.3615	0.0793	0.0647321	0.0027445	4.99e-05	4.07331e-05	0.0009295	1.69e-05	1.37954e-05	0.0028435	5.17e-05	4.22024e-05	0.0002904	5.28e-06	4.31003e-06	0.0001848	3.36e-06	2.74275e-06	1.408	0.0256	0.0208971	22.605	0.411	0.335497	1.8205e-08	3.31e-10	2.70193e-10	0.0627	0.00114	0.000930575	3.1075e-11	5.65e-13	4.61206e-13
26137120	Salmon, baked or broiled, made with oil	Protein Foods	Seafood	Seafood	Seafood	85	4.08147	0.68255	0.00803	0.0327742	0.66555	0.00783	0.0319579	0.3995	0.0047	0.0191829	7.5905	0.0893	0.364475	0.005423	6.38e-05	0.000260398	0.0022015	2.59e-05	0.00010571	0.002856	3.36e-05	0.000137137	0.005474	6.44e-05	0.000262847	0.0006987	8.22e-06	3.35497e-05	2.8475	0.0335	0.136729	9.095	0.107	0.436717	3.1535e-08	3.71e-10	1.51422e-09	0.0034765	4.09e-05	0.000166932	1.496e-10	1.76e-12	7.18338e-12
31103010	Egg, whole, boiled or poached	Protein Foods	Eggs	Eggs	Animal-based (other)	50	1.22444	0.3385	0.00677	0.00828947	0.3325	0.00665	0.00814254	0.37	0.0074	0.00906087	1.775	0.0355	0.0434677	0.00765	0.000153	0.00018734	0.000755	1.51e-05	1.84891e-05	0.00177	3.54e-05	4.33452e-05	0.0002605	5.21e-06	6.37934e-06	5.9e-05	1.18e-06	1.44484e-06	2.425	0.0485	0.0593854	1.97	0.0394	0.048243	1.9e-08	3.8e-10	4.65288e-10	0.01105	0.000221	0.000270602	3.315e-11	6.63e-13	8.11805e-13
41104020	Pinto, calico, or red Mexican beans, dry, cooked, fat not added in cooking	Protein Foods	Legumes	Legumes and soy products	Plant-based, other	90	0.391821	0.006975	7.75e-05	3.03661e-05	0.006795	7.55e-05	2.95825e-05	0.005319	5.91e-05	2.31566e-05	0.07803	0.000867	0.000339709	0.0003051	3.39e-06	1.32827e-06	3.753e-05	4.17e-07	1.63389e-07	5.76e-05	6.4e-07	2.50765e-07	8.289e-06	9.21e-08	3.60867e-08	2.304e-06	2.56e-08	1.00306e-08	0.03204	0.000356	0.000139488	0.1674	0.00186	0.000728787	3.402e-10	3.78e-12	1.48108e-12	0.005553	6.17e-05	2.41754e-05	2.781e-12	3.09e-14	1.21073e-14
42111200	Peanuts, dry roasted, salted	Protein Foods	Nuts and seeds	Nuts and seeds	Nuts and seeds	30	0.408147	0.0717	0.00239	0.000975471	0.0702	0.00234	0.000955064	0.1803	0.00601	0.00245296	0.318	0.0106	0.00432636	0.001044	3.48e-05	1.42035e-05	0.0002184	7.28e-06	2.97131e-06	0.000657	2.19e-05	8.93842e-06	7.59e-05	2.53e-06	1.03261e-06	2.121e-05	7.07e-07	2.8856e-07	0.2655	0.00885	0.0036121	0.1431	0.00477	0.00194686	3.27e-09	1.09e-10	4.4488e-11	0.00525	0.000175	7.14257e-05	7.23e-12	2.41e-13	9.83634e-14
56203010	Oatmeal, cooked, regular, fat not added in cooking	Grains	Grains	Cooked Cereals	Plant-based, other	234	4.48962	0.046566	0.000199	0.000893434	0.045396	0.000194	0.000870985	0.194688	0.000832	0.00373536	0.233064	0.000996	0.00447166	0.00075348	3.22e-06	1.44566e-05	0.00016848	7.2e-07	3.23252e-06	0.0004446	1.9e-06	8.53027e-06	0.000125892	5.38e-07	2.41541e-06	1.40166e-05	5.99e-08	2.68928e-07	0.37206	0.00159	0.00713849	0.13221	0.000565	0.00253663	2.808e-09	1.2e-11	5.38754e-11	0.0106236	4.54e-05	0.000203829	5.967e-12	2.55e-14	1.14485e-13
56205008	Rice, white, cooked, fat not added in cooking	Grains	Grains	Cooked Grains	Plant-based, other	140	3.26517	0.2044	0.00146	0.00476716	0.11886	0.000849	0.00277213	0.1337	0.000955	0.00311824	0.8162	0.00583	0.019036	0.003094	2.21e-05	7.21604e-05	0.0003094	2.21e-06	7.21604e-06	0.0004914	3.51e-06	1.14608e-05	0.0001582	1.13e-06	3.68965e-06	1.2278e-05	8.77e-08	2.86356e-07	2.198	0.0157	0.0512632	0.707	0.00505	0.0164891	7.028e-09	5.02e-11	1.63912e-10	0.04326	0.000309	0.00100894	1.0934e-11	7.81e-14	2.5501e-13
63107010	Banana, raw	Fruit	Fruits	Fruits	Plant-based, other	140	9.79552	0.02772	0.000198	0.00193951	0.02646	0.000189	0.00185135	0.011676	8.34e-05	0.000816947	0.2996	0.00214	0.0209624	0.0011298	8.07e-06	7.90499e-05	0.0002352	1.68e-06	1.64565e-05	0.0009954	7.11e-06	6.96462e-05	5.95e-05	4.25e-07	4.1631e-06	3.248e-05	2.32e-07	2.27256e-06	0.2268	0.00162	0.0158688	0.1932	0.00138	0.0135178	2.002e-09	1.43e-11	1.40076e-10	0.0336	0.00024	0.00235093	4.256e-12	3.04e-14	2.97784e-13
75113000	Lettuce, raw	Vegetables	Vegetables	Vegetables, excluding starchy	Plant-based, other	85	10.6118	0.030345	0.000357	0.00378842	0.029155	0.000343	0.00363985	0.016745	0.000197	0.00209053	0.26095	0.00307	0.0325783	0.00060605	7.13e-06	7.56623e-05	0.00011475	1.35e-06	1.4326e-05	0.00015215	1.79e-06	1.89952e-05	2.1335e-05	2.51e-07	2.66357e-06	4.4285e-06	5.21e-08	5.52876e-07	0.17	0.002	0.0212236	0.1343	0.00158	0.0167667	2.9325e-09	3.45e-11	3.66108e-10	0.005372	6.32e-05	0.000670667	6.4175e-12	7.55e-14	8.01192e-13
83106000	Italian dressing, made with vinegar and oil	Fats and Oils	Fats and Oils	Oils	Plant-based, other	30	0.816294	0.093	0.0031	0.00253051	0.0918	0.00306	0.00249786	0.1746	0.00582	0.00475083	0.504	0.0168	0.0137137	0.000987	3.29e-05	2.68561e-05	0.0002271	7.57e-06	6.17934e-06	0.000564	1.88e-05	1.53463e-05	9.24e-05	3.08e-06	2.51418e-06	1.977e-05	6.59e-07	5.37938e-07	10.56	0.352	0.287335	0.516	0.0172	0.0140403	5.22e-09	1.74e-10	1.42035e-10	0.00693	0.000231	0.000188564	1.248e-11	4.16e-13	3.39578e-13
92552010	Fruit flavored drink, powdered, reconstituted, diet	Beverages, Nonalcoholic	Beverages, Nonalcoholic	Diet Beverages	Other	240	8.16295	0.000312	1.3e-06	1.06118e-05	0.0002976	1.24e-06	1.01221e-05	0.000468	1.95e-06	1.59177e-05	0.003144	1.31e-05	0.000106935	1.8072e-05	7.53e-08	6.1467e-07	9.36e-07	3.9e-09	3.18355e-08	2.0016e-06	8.34e-09	6.8079e-08	4.92e-07	2.05e-09	1.6734e-08	1.3128e-07	5.47e-10	4.46513e-09	0.003192	1.33e-05	0.000108567	0.002712	1.13e-05	9.22413e-05	2.712e-11	1.13e-13	9.22413e-13	3.264e-05	1.36e-07	1.11016e-06	3.36e-14	1.4e-16	1.14281e-15
		Emissions From Diet								0.200623			0.155596			0.151716			1.24346			0.00181292			0.000538619			0.00138279			0.000394575			7.78979e-05			1.03822			1.95919			8.97364e-09			0.00706724			2.18283e-11
TABLE 3: EMISSION CALCULATION FOR S2M2
		Characteristics of select foods						Impact Categories
WWEIA Foodcode	Food Description	USDA Main Group	Food subgroup	HENI category	Main ingredient contributing to environmental impacts	RACC (g/serving)	Qty of Diet	Global warming, shorter term (kg CO2 eq/serving)			Global warming, long term (kg CO2 eq/serving)			Land occupation, biodiversity (ha-yr arable/serving)			Fossil energy use (MJ/serving)			Mineral resources use (kg deprived/serving)			Freshwater acidification (kg SO2 eq/serving)			Terrestrial acidification (kg SO2 eq/serving)			Freshwater eutrophication (kg PO4---P- eq/serving)			Marine eutrophication (kg N eq/serving)			Freshwater ecotoxicity (CTUe/serving)			Ionizing radiation (Bq C-14 eq/serving)			Ozone Layer Depletion (kg CFC-11 eq/serving)			Water use (m3/serving)			Photochemical oxidant formation (DALYs/serving)
								HH, EQ			HH, EQ			EQ									EQ			EQ			EQ			EQ			EQ			HH, EQ			HH, EQ						HH
								Mean	Factor	Future Food	Mean	Factor	FF	Mean	Factor	FF	Mean	Factor	FF	Mean	Factor	FF	Mean	Factor	FF	Mean	Factor	FF	Mean	Factor	FF	Mean	Factor	FF	Mean	Factor	FF	Mean	Factor	FF	Mean	Factor	FF	Mean	Factor	FF	Mean	Factor	FF
11111000	Milk, whole	Milk and Dairy	Dairy	Milk	Dairy	244	8.13495	0.62952	0.00258	0.0209882	0.40504	0.00166	0.013504	0.29768	0.00122	0.00992464	2.03496	0.00834	0.0678455	0.0027328	1.12e-05	9.11115e-05	0.00102724	4.21e-06	3.42482e-05	0.0026596	1.09e-05	8.8671e-05	0.00025376	1.04e-06	8.46035e-06	8.906e-05	3.65e-07	2.96926e-06	1.70312	0.00698	0.056782	3.172	0.013	0.105754	1.88856e-08	7.74e-11	6.29645e-10	0.0207888	8.52e-05	0.000693098	3.6844e-11	1.51e-13	1.22838e-12
21500100	Ground beef, cooked	Protein Foods	Beef	Red meat	Beef	85	2.8635	3.1705	0.0373	0.106809	2.227	0.0262	0.0750238	2.227	0.0262	0.0750238	15.13	0.178	0.509704	0.024225	0.000285	0.000816099	0.0081855	9.63e-05	0.000275755	0.02431	0.000286	0.000818962	0.002346	2.76e-05	7.90327e-05	0.0008585	1.01e-05	2.89214e-05	9.605	0.113	0.323576	25.5	0.3	0.859051	1.2665e-07	1.49e-09	4.26662e-09	7.106e-05	8.36e-07	2.39389e-06	2.635e-10	3.1e-12	8.87686e-12
24144210	Chicken, drumstick, fried, no coating, skin eaten, NS as to type of fat added in cooking	Protein Foods	Poultry	Poultry	Poultry	85	2.34287	0.44115	0.00519	0.0121595	0.41395	0.00487	0.0114098	0.73865	0.00869	0.0203595	3.9865	0.0469	0.10988	0.005406	6.36e-05	0.000149006	0.0016235	1.91e-05	4.47488e-05	0.0048365	5.69e-05	0.000133309	0.00069615	8.19e-06	1.91881e-05	0.00016405	1.93e-06	4.52173e-06	2.2015	0.0259	0.0606803	4.352	0.0512	0.119955	3.74e-08	4.4e-10	1.03086e-09	0.02006	0.000236	0.000552917	5.4655e-11	6.43e-13	1.50646e-12
25221405	Pork sausage	Protein Foods	Processed meat	Cured Meats/Poultry	Processed meat	55	0.813495	0.3905	0.0071	0.00577582	0.2761	0.00502	0.00408375	0.2354	0.00428	0.00348176	4.3615	0.0793	0.0645102	0.0027445	4.99e-05	4.05934e-05	0.0009295	1.69e-05	1.37481e-05	0.0028435	5.17e-05	4.20577e-05	0.0002904	5.28e-06	4.29526e-06	0.0001848	3.36e-06	2.73334e-06	1.408	0.0256	0.0208255	22.605	0.411	0.334347	1.8205e-08	3.31e-10	2.69267e-10	0.0627	0.00114	0.000927385	3.1075e-11	5.65e-13	4.59625e-13
26137120	Salmon, baked or broiled, made with oil	Protein Foods	Seafood	Seafood	Seafood	85	4.06748	0.68255	0.00803	0.0326618	0.66555	0.00783	0.0318483	0.3995	0.0047	0.0191171	7.5905	0.0893	0.363226	0.005423	6.38e-05	0.000259505	0.0022015	2.59e-05	0.000105348	0.002856	3.36e-05	0.000136667	0.005474	6.44e-05	0.000261946	0.0006987	8.22e-06	3.34347e-05	2.8475	0.0335	0.13626	9.095	0.107	0.43522	3.1535e-08	3.71e-10	1.50903e-09	0.0034765	4.09e-05	0.00016636	1.496e-10	1.76e-12	7.15876e-12
31103010	Egg, whole, boiled or poached	Protein Foods	Eggs	Eggs	Animal-based (other)	50	1.22024	0.3385	0.00677	0.00826105	0.3325	0.00665	0.00811462	0.37	0.0074	0.0090298	1.775	0.0355	0.0433186	0.00765	0.000153	0.000186697	0.000755	1.51e-05	1.84257e-05	0.00177	3.54e-05	4.31966e-05	0.0002605	5.21e-06	6.35747e-06	5.9e-05	1.18e-06	1.43989e-06	2.425	0.0485	0.0591818	1.97	0.0394	0.0480776	1.9e-08	3.8e-10	4.63692e-10	0.01105	0.000221	0.000269674	3.315e-11	6.63e-13	8.09021e-13
41104020	Pinto, calico, or red Mexican beans, dry, cooked, fat not added in cooking	Protein Foods	Legumes	Legumes and soy products	Plant-based, other	90	0.488097	0.006975	7.75e-05	3.78275e-05	0.006795	7.55e-05	3.68513e-05	0.005319	5.91e-05	2.88465e-05	0.07803	0.000867	0.00042318	0.0003051	3.39e-06	1.65465e-06	3.753e-05	4.17e-07	2.03537e-07	5.76e-05	6.4e-07	3.12382e-07	8.289e-06	9.21e-08	4.49538e-08	2.304e-06	2.56e-08	1.24953e-08	0.03204	0.000356	0.000173763	0.1674	0.00186	0.000907861	3.402e-10	3.78e-12	1.84501e-12	0.005553	6.17e-05	3.01156e-05	2.781e-12	3.09e-14	1.50822e-14
42111200	Peanuts, dry roasted, salted	Protein Foods	Nuts and seeds	Nuts and seeds	Nuts and seeds	30	0.406748	0.0717	0.00239	0.000972127	0.0702	0.00234	0.00095179	0.1803	0.00601	0.00244455	0.318	0.0106	0.00431153	0.001044	3.48e-05	1.41548e-05	0.0002184	7.28e-06	2.96112e-06	0.000657	2.19e-05	8.90777e-06	7.59e-05	2.53e-06	1.02907e-06	2.121e-05	7.07e-07	2.87571e-07	0.2655	0.00885	0.00359972	0.1431	0.00477	0.00194019	3.27e-09	1.09e-10	4.43355e-11	0.00525	0.000175	7.11809e-05	7.23e-12	2.41e-13	9.80262e-14
56203010	Oatmeal, cooked, regular, fat not added in cooking	Grains	Grains	Cooked Cereals	Plant-based, other	234	4.47422	0.046566	0.000199	0.000890371	0.045396	0.000194	0.000868	0.194688	0.000832	0.00372256	0.233064	0.000996	0.00445633	0.00075348	3.22e-06	1.4407e-05	0.00016848	7.2e-07	3.22144e-06	0.0004446	1.9e-06	8.50103e-06	0.000125892	5.38e-07	2.40713e-06	1.40166e-05	5.99e-08	2.68006e-07	0.37206	0.00159	0.00711402	0.13221	0.000565	0.00252794	2.808e-09	1.2e-11	5.36907e-11	0.0106236	4.54e-05	0.00020313	5.967e-12	2.55e-14	1.14093e-13
56205008	Rice, white, cooked, fat not added in cooking	Grains	Grains	Cooked Grains	Plant-based, other	140	3.25398	0.2044	0.00146	0.00475081	0.11886	0.000849	0.00276263	0.1337	0.000955	0.00310755	0.8162	0.00583	0.0189707	0.003094	2.21e-05	7.1913e-05	0.0003094	2.21e-06	7.1913e-06	0.0004914	3.51e-06	1.14215e-05	0.0001582	1.13e-06	3.677e-06	1.2278e-05	8.77e-08	2.85374e-07	2.198	0.0157	0.0510875	0.707	0.00505	0.0164326	7.028e-09	5.02e-11	1.6335e-10	0.04326	0.000309	0.00100548	1.0934e-11	7.81e-14	2.54136e-13
63107010	Banana, raw	Fruit	Fruits	Fruits	Plant-based, other	140	9.76195	0.02772	0.000198	0.00193287	0.02646	0.000189	0.00184501	0.011676	8.34e-05	0.000814146	0.2996	0.00214	0.0208906	0.0011298	8.07e-06	7.87789e-05	0.0002352	1.68e-06	1.64001e-05	0.0009954	7.11e-06	6.94074e-05	5.95e-05	4.25e-07	4.14883e-06	3.248e-05	2.32e-07	2.26477e-06	0.2268	0.00162	0.0158144	0.1932	0.00138	0.0134715	2.002e-09	1.43e-11	1.39596e-10	0.0336	0.00024	0.00234287	4.256e-12	3.04e-14	2.96763e-13
75113000	Lettuce, raw	Vegetables	Vegetables	Vegetables, excluding starchy	Plant-based, other	85	10.5754	0.030345	0.000357	0.00377543	0.029155	0.000343	0.00362738	0.016745	0.000197	0.00208336	0.26095	0.00307	0.0324666	0.00060605	7.13e-06	7.54029e-05	0.00011475	1.35e-06	1.42768e-05	0.00015215	1.79e-06	1.893e-05	2.1335e-05	2.51e-07	2.65444e-06	4.4285e-06	5.21e-08	5.5098e-07	0.17	0.002	0.0211509	0.1343	0.00158	0.0167092	2.9325e-09	3.45e-11	3.64853e-10	0.005372	6.32e-05	0.000668368	6.4175e-12	7.55e-14	7.98446e-13
83106000	Italian dressing, made with vinegar and oil	Fats and Oils	Fats and Oils	Oils	Plant-based, other	30	0.813495	0.093	0.0031	0.00252184	0.0918	0.00306	0.0024893	0.1746	0.00582	0.00473454	0.504	0.0168	0.0136667	0.000987	3.29e-05	2.6764e-05	0.0002271	7.57e-06	6.15816e-06	0.000564	1.88e-05	1.52937e-05	9.24e-05	3.08e-06	2.50557e-06	1.977e-05	6.59e-07	5.36093e-07	10.56	0.352	0.28635	0.516	0.0172	0.0139921	5.22e-09	1.74e-10	1.41548e-10	0.00693	0.000231	0.000187917	1.248e-11	4.16e-13	3.38414e-13
92552010	Fruit flavored drink, powdered, reconstituted, diet	Beverages, Nonalcoholic	Beverages, Nonalcoholic	Diet Beverages	Other	240	8.13495	0.000312	1.3e-06	1.05754e-05	0.0002976	1.24e-06	1.00873e-05	0.000468	1.95e-06	1.58632e-05	0.003144	1.31e-05	0.000106568	1.8072e-05	7.53e-08	6.12562e-07	9.36e-07	3.9e-09	3.17263e-08	2.0016e-06	8.34e-09	6.78455e-08	4.92e-07	2.05e-09	1.66767e-08	1.3128e-07	5.47e-10	4.44982e-09	0.003192	1.33e-05	0.000108195	0.002712	1.13e-05	9.1925e-05	2.712e-11	1.13e-13	9.1925e-13	3.264e-05	1.36e-07	1.10635e-06	3.36e-14	1.4e-16	1.13889e-15
		Emissions from Diet								0.201547			0.156575			0.153888			1.25378			0.0018267			0.000542718			0.00139571			0.000395763			7.823e-05			1.0427			1.96848			9.07926e-09			0.00712199			2.19552e-11
TABLE 4: EMISSION CALCULATION FOR S2M3
S2M3
		Characteristics of select foods						Impact Categories
WWEIA Foodcode	Food Description	USDA Main Group	Food subgroup	HENI category	Main ingredient contributing to environmental impacts	RACC (g/serving)	Qty of Diet	Global warming, shorter term (kg CO2 eq/serving)			Global warming, long term (kg CO2 eq/serving)			Land occupation, biodiversity (ha-yr arable/serving)			Fossil energy use (MJ/serving)			Mineral resources use (kg deprived/serving)			Freshwater acidification (kg SO2 eq/serving)			Terrestrial acidification (kg SO2 eq/serving)			Freshwater eutrophication (kg PO4---P- eq/serving)			Marine eutrophication (kg N eq/serving)			Freshwater ecotoxicity (CTUe/serving)			Ionizing radiation (Bq C-14 eq/serving)			Ozone Layer Depletion (kg CFC-11 eq/serving)			Water use (m3/serving)			Photochemical oxidant formation (DALYs/serving)
								HH, EQ			HH, EQ			EQ									EQ			EQ			EQ			EQ			EQ			HH, EQ			HH, EQ						HH
								Mean	Factor	Future Food	Mean	Factor	FF	Mean	Factor	FF	Mean	Factor	FF	Mean	Factor	FF	Mean	Factor	FF	Mean	Factor	FF	Mean	Factor	FF	Mean	Factor	FF	Mean	Factor	FF	Mean	Factor	FF	Mean	Factor	FF	Mean	Factor	FF	Mean	Factor	FF
11111000	Milk, whole	Milk and Dairy	Dairy	Milk	Dairy	244	7.94956	0.62952	0.00258	0.0205099	0.40504	0.00166	0.0131963	0.29768	0.00122	0.00969846	2.03496	0.00834	0.0662993	0.0027328	1.12e-05	8.9035e-05	0.00102724	4.21e-06	3.34676e-05	0.0026596	1.09e-05	8.66502e-05	0.00025376	1.04e-06	8.26754e-06	8.906e-05	3.65e-07	2.90159e-06	1.70312	0.00698	0.0554879	3.172	0.013	0.103344	1.88856e-08	7.74e-11	6.15296e-10	0.0207888	8.52e-05	0.000677302	3.6844e-11	1.51e-13	1.20038e-12
21500100	Ground beef, cooked	Protein Foods	Beef	Red meat	Beef	85	2.79824	3.1705	0.0373	0.104374	2.227	0.0262	0.073314	2.227	0.0262	0.073314	15.13	0.178	0.498087	0.024225	0.000285	0.000797499	0.0081855	9.63e-05	0.000269471	0.02431	0.000286	0.000800298	0.002346	2.76e-05	7.72315e-05	0.0008585	1.01e-05	2.82623e-05	9.605	0.113	0.316202	25.5	0.3	0.839473	1.2665e-07	1.49e-09	4.16938e-09	7.106e-05	8.36e-07	2.33933e-06	2.635e-10	3.1e-12	8.67455e-12
24144210	Chicken, drumstick, fried, no coating, skin eaten, NS as to type of fat added in cooking	Protein Foods	Poultry	Poultry	Poultry	85	2.28947	0.44115	0.00519	0.0118824	0.41395	0.00487	0.0111497	0.73865	0.00869	0.0198955	3.9865	0.0469	0.107376	0.005406	6.36e-05	0.00014561	0.0016235	1.91e-05	4.37289e-05	0.0048365	5.69e-05	0.000130271	0.00069615	8.19e-06	1.87508e-05	0.00016405	1.93e-06	4.41868e-06	2.2015	0.0259	0.0592973	4.352	0.0512	0.117221	3.74e-08	4.4e-10	1.00737e-09	0.02006	0.000236	0.000540315	5.4655e-11	6.43e-13	1.47213e-12
25221405	Pork sausage	Protein Foods	Processed meat	Cured Meats/Poultry	Processed meat	55	1.43092	0.3905	0.0071	0.0101595	0.2761	0.00502	0.00718322	0.2354	0.00428	0.00612434	4.3615	0.0793	0.113472	0.0027445	4.99e-05	7.14029e-05	0.0009295	1.69e-05	2.41825e-05	0.0028435	5.17e-05	7.39786e-05	0.0002904	5.28e-06	7.55526e-06	0.0001848	3.36e-06	4.80789e-06	1.408	0.0256	0.0366316	22.605	0.411	0.588108	1.8205e-08	3.31e-10	4.73635e-10	0.0627	0.00114	0.00163125	3.1075e-11	5.65e-13	8.0847e-13
26137120	Salmon, baked or broiled, made with oil	Protein Foods	Seafood	Seafood	Seafood	85	3.97478	0.68255	0.00803	0.0319175	0.66555	0.00783	0.0311225	0.3995	0.0047	0.0186815	7.5905	0.0893	0.354948	0.005423	6.38e-05	0.000253591	0.0022015	2.59e-05	0.000102947	0.002856	3.36e-05	0.000133553	0.005474	6.44e-05	0.000255976	0.0006987	8.22e-06	3.26727e-05	2.8475	0.0335	0.133155	9.095	0.107	0.425301	3.1535e-08	3.71e-10	1.47464e-09	0.0034765	4.09e-05	0.000162568	1.496e-10	1.76e-12	6.99561e-12
31103010	Egg, whole, boiled or poached	Protein Foods	Eggs	Eggs	Animal-based (other)	50	1.19243	0.3385	0.00677	0.00807277	0.3325	0.00665	0.00792968	0.37	0.0074	0.00882401	1.775	0.0355	0.0423314	0.00765	0.000153	0.000182442	0.000755	1.51e-05	1.80057e-05	0.00177	3.54e-05	4.22121e-05	0.0002605	5.21e-06	6.21258e-06	5.9e-05	1.18e-06	1.40707e-06	2.425	0.0485	0.057833	1.97	0.0394	0.0469819	1.9e-08	3.8e-10	4.53125e-10	0.01105	0.000221	0.000263528	3.315e-11	6.63e-13	7.90583e-13
41104020	Pinto, calico, or red Mexican beans, dry, cooked, fat not added in cooking	Protein Foods	Legumes	Legumes and soy products	Plant-based, other	90	0.635964	0.006975	7.75e-05	4.92872e-05	0.006795	7.55e-05	4.80153e-05	0.005319	5.91e-05	3.75855e-05	0.07803	0.000867	0.000551381	0.0003051	3.39e-06	2.15592e-06	3.753e-05	4.17e-07	2.65197e-07	5.76e-05	6.4e-07	4.07017e-07	8.289e-06	9.21e-08	5.85723e-08	2.304e-06	2.56e-08	1.62807e-08	0.03204	0.000356	0.000226403	0.1674	0.00186	0.00118289	3.402e-10	3.78e-12	2.40395e-12	0.005553	6.17e-05	3.9239e-05	2.781e-12	3.09e-14	1.96513e-14
42111200	Peanuts, dry roasted, salted	Protein Foods	Nuts and seeds	Nuts and seeds	Nuts and seeds	30	0.397478	0.0717	0.00239	0.000949972	0.0702	0.00234	0.000930098	0.1803	0.00601	0.00238884	0.318	0.0106	0.00421326	0.001044	3.48e-05	1.38322e-05	0.0002184	7.28e-06	2.89364e-06	0.000657	2.19e-05	8.70476e-06	7.59e-05	2.53e-06	1.00562e-06	2.121e-05	7.07e-07	2.81017e-07	0.2655	0.00885	0.00351768	0.1431	0.00477	0.00189597	3.27e-09	1.09e-10	4.33251e-11	0.00525	0.000175	6.95586e-05	7.23e-12	2.41e-13	9.57921e-14
56203010	Oatmeal, cooked, regular, fat not added in cooking	Grains	Grains	Cooked Cereals	Plant-based, other	234	4.37226	0.046566	0.000199	0.000870079	0.045396	0.000194	0.000848218	0.194688	0.000832	0.00363772	0.233064	0.000996	0.00435477	0.00075348	3.22e-06	1.40787e-05	0.00016848	7.2e-07	3.14802e-06	0.0004446	1.9e-06	8.30729e-06	0.000125892	5.38e-07	2.35227e-06	1.40166e-05	5.99e-08	2.61898e-07	0.37206	0.00159	0.00695189	0.13221	0.000565	0.00247032	2.808e-09	1.2e-11	5.24671e-11	0.0106236	4.54e-05	0.0001985	5.967e-12	2.55e-14	1.11493e-13
56205008	Rice, white, cooked, fat not added in cooking	Grains	Grains	Cooked Grains	Plant-based, other	140	3.17982	0.2044	0.00146	0.00464254	0.11886	0.000849	0.00269967	0.1337	0.000955	0.00303673	0.8162	0.00583	0.0185384	0.003094	2.21e-05	7.02741e-05	0.0003094	2.21e-06	7.02741e-06	0.0004914	3.51e-06	1.11612e-05	0.0001582	1.13e-06	3.5932e-06	1.2278e-05	8.77e-08	2.7887e-07	2.198	0.0157	0.0499232	0.707	0.00505	0.0160581	7.028e-09	5.02e-11	1.59627e-10	0.04326	0.000309	0.000982565	1.0934e-11	7.81e-14	2.48344e-13
63107010	Banana, raw	Fruit	Fruits	Fruits	Plant-based, other	140	9.53947	0.02772	0.000198	0.00188881	0.02646	0.000189	0.00180296	0.011676	8.34e-05	0.000795591	0.2996	0.00214	0.0204145	0.0011298	8.07e-06	7.69835e-05	0.0002352	1.68e-06	1.60263e-05	0.0009954	7.11e-06	6.78256e-05	5.95e-05	4.25e-07	4.05427e-06	3.248e-05	2.32e-07	2.21316e-06	0.2268	0.00162	0.0154539	0.1932	0.00138	0.0131645	2.002e-09	1.43e-11	1.36414e-10	0.0336	0.00024	0.00228947	4.256e-12	3.04e-14	2.9e-13
75113000	Lettuce, raw	Vegetables	Vegetables	Vegetables, excluding starchy	Plant-based, other	85	10.3344	0.030345	0.000357	0.00368939	0.029155	0.000343	0.00354471	0.016745	0.000197	0.00203588	0.26095	0.00307	0.0317267	0.00060605	7.13e-06	7.36844e-05	0.00011475	1.35e-06	1.39515e-05	0.00015215	1.79e-06	1.84986e-05	2.1335e-05	2.51e-07	2.59394e-06	4.4285e-06	5.21e-08	5.38423e-07	0.17	0.002	0.0206688	0.1343	0.00158	0.0163284	2.9325e-09	3.45e-11	3.56538e-10	0.005372	6.32e-05	0.000653135	6.4175e-12	7.55e-14	7.80249e-13
83106000	Italian dressing, made with vinegar and oil	Fats and Oils	Fats and Oils	Oils	Plant-based, other	30	0.794956	0.093	0.0031	0.00246436	0.0918	0.00306	0.00243256	0.1746	0.00582	0.00462664	0.504	0.0168	0.0133553	0.000987	3.29e-05	2.6154e-05	0.0002271	7.57e-06	6.01781e-06	0.000564	1.88e-05	1.49452e-05	9.24e-05	3.08e-06	2.44846e-06	1.977e-05	6.59e-07	5.23876e-07	10.56	0.352	0.279824	0.516	0.0172	0.0136732	5.22e-09	1.74e-10	1.38322e-10	0.00693	0.000231	0.000183635	1.248e-11	4.16e-13	3.30702e-13
92552010	Fruit flavored drink, powdered, reconstituted, diet	Beverages, Nonalcoholic	Beverages, Nonalcoholic	Diet Beverages	Other	240	7.94956	0.000312	1.3e-06	1.03344e-05	0.0002976	1.24e-06	9.85745e-06	0.000468	1.95e-06	1.55016e-05	0.003144	1.31e-05	0.000104139	1.8072e-05	7.53e-08	5.98602e-07	9.36e-07	3.9e-09	3.10033e-08	2.0016e-06	8.34e-09	6.62993e-08	4.92e-07	2.05e-09	1.62966e-08	1.3128e-07	5.47e-10	4.34841e-09	0.003192	1.33e-05	0.000105729	0.002712	1.13e-05	8.983e-05	2.712e-11	1.13e-13	8.983e-13	3.264e-05	1.36e-07	1.08114e-06	3.36e-14	1.4e-16	1.11294e-15
			Emissions from Diet							0.201481			0.156211			0.153112			1.27577			0.00181734			0.000541163			0.00139688			0.000390116			7.8588e-05			1.03528			2.18529			9.08344e-09			0.00769449			2.18191e-11
TABLE 5: EMISSION CALCULATION FOR S3M1
		Characteristics of select foods						Impact Categories
WWEIA Foodcode	Food Description	USDA Main Group	Food subgroup	HENI category	Main ingredient contributing to environmental impacts	RACC (g/serving)	Qty of Diet	Global warming, shorter term (kg CO2 eq/serving)			Global warming, long term (kg CO2 eq/serving)			Land occupation, biodiversity (ha-yr arable/serving)			Fossil energy use (MJ/serving)			Mineral resources use (kg deprived/serving)			Freshwater acidification (kg SO2 eq/serving)			Terrestrial acidification (kg SO2 eq/serving)			Freshwater eutrophication (kg PO4---P- eq/serving)			Marine eutrophication (kg N eq/serving)			Freshwater ecotoxicity (CTUe/serving)			Ionizing radiation (Bq C-14 eq/serving)			Ozone Layer Depletion (kg CFC-11 eq/serving)			Water use (m3/serving)			Photochemical oxidant formation (DALYs/serving)
								HH, EQ			HH, EQ			EQ									EQ			EQ			EQ			EQ			EQ			HH, EQ			HH, EQ						HH
								Mean	Factor	Future Food	Mean	Factor	FF	Mean	Factor	FF	Mean	Factor	FF	Mean	Factor	FF	Mean	Factor	FF	Mean	Factor	FF	Mean	Factor	FF	Mean	Factor	FF	Mean	Factor	FF	Mean	Factor	FF	Mean	Factor	FF	Mean	Factor	FF	Mean	Factor	FF
11111000	Milk, whole	Milk and Dairy	Dairy	Milk	Dairy	244	8.10492	0.62952	0.00258	0.0209107	0.40504	0.00166	0.0134542	0.29768	0.00122	0.009888	2.03496	0.00834	0.067595	0.0027328	1.12e-05	9.07751e-05	0.00102724	4.21e-06	3.41217e-05	0.0026596	1.09e-05	8.83436e-05	0.00025376	1.04e-06	8.42912e-06	8.906e-05	3.65e-07	2.9583e-06	1.70312	0.00698	0.0565723	3.172	0.013	0.105364	1.88856e-08	7.74e-11	6.27321e-10	0.0207888	8.52e-05	0.000690539	3.6844e-11	1.51e-13	1.22384e-12
21500100	Ground beef, cooked	Protein Foods	Beef	Red meat	Beef	85	2.4639	3.1705	0.0373	0.0919033	2.227	0.0262	0.0645541	2.227	0.0262	0.0645541	15.13	0.178	0.438573	0.024225	0.000285	0.00070221	0.0081855	9.63e-05	0.000237273	0.02431	0.000286	0.000704674	0.002346	2.76e-05	6.80035e-05	0.0008585	1.01e-05	2.48853e-05	9.605	0.113	0.27842	25.5	0.3	0.739169	1.2665e-07	1.49e-09	3.6712e-09	7.106e-05	8.36e-07	2.05982e-06	2.635e-10	3.1e-12	7.63808e-12
24144210	Chicken, drumstick, fried, no coating, skin eaten, NS as to type of fat added in cooking	Protein Foods	Poultry	Poultry	Poultry	85	2.02623	0.44115	0.00519	0.0105161	0.41395	0.00487	0.00986773	0.73865	0.00869	0.0176079	3.9865	0.0469	0.0950301	0.005406	6.36e-05	0.000128868	0.0016235	1.91e-05	3.87009e-05	0.0048365	5.69e-05	0.000115292	0.00069615	8.19e-06	1.65948e-05	0.00016405	1.93e-06	3.91062e-06	2.2015	0.0259	0.0524793	4.352	0.0512	0.103743	3.74e-08	4.4e-10	8.9154e-10	0.02006	0.000236	0.00047819	5.4655e-11	6.43e-13	1.30286e-12
25221405	Pork sausage	Protein Foods	Processed meat	Cured Meats/Poultry	Processed meat	55	0.810492	0.3905	0.0071	0.00575449	0.2761	0.00502	0.00406867	0.2354	0.00428	0.00346891	4.3615	0.0793	0.064272	0.0027445	4.99e-05	4.04436e-05	0.0009295	1.69e-05	1.36973e-05	0.0028435	5.17e-05	4.19024e-05	0.0002904	5.28e-06	4.2794e-06	0.0001848	3.36e-06	2.72325e-06	1.408	0.0256	0.0207486	22.605	0.411	0.333112	1.8205e-08	3.31e-10	2.68273e-10	0.0627	0.00114	0.000923961	3.1075e-11	5.65e-13	4.57928e-13
26137120	Salmon, baked or broiled, made with oil	Protein Foods	Seafood	Seafood	Seafood	85	4.05246	0.68255	0.00803	0.0325413	0.66555	0.00783	0.0317308	0.3995	0.0047	0.0190466	7.5905	0.0893	0.361885	0.005423	6.38e-05	0.000258547	0.0022015	2.59e-05	0.000104959	0.002856	3.36e-05	0.000136163	0.005474	6.44e-05	0.000260978	0.0006987	8.22e-06	3.33112e-05	2.8475	0.0335	0.135757	9.095	0.107	0.433613	3.1535e-08	3.71e-10	1.50346e-09	0.0034765	4.09e-05	0.000165746	1.496e-10	1.76e-12	7.13233e-12
31103010	Egg, whole, boiled or poached	Protein Foods	Eggs	Eggs	Animal-based (other)	50	1.21574	0.3385	0.00677	0.00823054	0.3325	0.00665	0.00808465	0.37	0.0074	0.00899645	1.775	0.0355	0.0431586	0.00765	0.000153	0.000186008	0.000755	1.51e-05	1.83576e-05	0.00177	3.54e-05	4.30371e-05	0.0002605	5.21e-06	6.33399e-06	5.9e-05	1.18e-06	1.43457e-06	2.425	0.0485	0.0589632	1.97	0.0394	0.0479	1.9e-08	3.8e-10	4.6198e-10	0.01105	0.000221	0.000268678	3.315e-11	6.63e-13	8.06033e-13
41104020	Pinto, calico, or red Mexican beans, dry, cooked, fat not added in cooking	Protein Foods	Legumes	Legumes and soy products	Plant-based, other	90	0.778072	0.006975	7.75e-05	6.03006e-05	0.006795	7.55e-05	5.87445e-05	0.005319	5.91e-05	4.59841e-05	0.07803	0.000867	0.000674589	0.0003051	3.39e-06	2.63767e-06	3.753e-05	4.17e-07	3.24456e-07	5.76e-05	6.4e-07	4.97966e-07	8.289e-06	9.21e-08	7.16605e-08	2.304e-06	2.56e-08	1.99187e-08	0.03204	0.000356	0.000276994	0.1674	0.00186	0.00144721	3.402e-10	3.78e-12	2.94111e-12	0.005553	6.17e-05	4.80071e-05	2.781e-12	3.09e-14	2.40424e-14
42111200	Peanuts, dry roasted, salted	Protein Foods	Nuts and seeds	Nuts and seeds	Nuts and seeds	30	0.405246	0.0717	0.00239	0.000968538	0.0702	0.00234	0.000948276	0.1803	0.00601	0.00243553	0.318	0.0106	0.00429561	0.001044	3.48e-05	1.41026e-05	0.0002184	7.28e-06	2.95019e-06	0.000657	2.19e-05	8.87489e-06	7.59e-05	2.53e-06	1.02527e-06	2.121e-05	7.07e-07	2.86509e-07	0.2655	0.00885	0.00358643	0.1431	0.00477	0.00193302	3.27e-09	1.09e-10	4.41718e-11	0.00525	0.000175	7.09181e-05	7.23e-12	2.41e-13	9.76643e-14
56203010	Oatmeal, cooked, regular, fat not added in cooking	Grains	Grains	Cooked Cereals	Plant-based, other	234	4.45771	0.046566	0.000199	0.000887084	0.045396	0.000194	0.000864795	0.194688	0.000832	0.00370881	0.233064	0.000996	0.00443988	0.00075348	3.22e-06	1.43538e-05	0.00016848	7.2e-07	3.20955e-06	0.0004446	1.9e-06	8.46964e-06	0.000125892	5.38e-07	2.39825e-06	1.40166e-05	5.99e-08	2.67017e-07	0.37206	0.00159	0.00708775	0.13221	0.000565	0.0025186	2.808e-09	1.2e-11	5.34925e-11	0.0106236	4.54e-05	0.00020238	5.967e-12	2.55e-14	1.13672e-13
56205008	Rice, white, cooked, fat not added in cooking	Grains	Grains	Cooked Grains	Plant-based, other	140	3.24197	0.2044	0.00146	0.00473327	0.11886	0.000849	0.00275243	0.1337	0.000955	0.00309608	0.8162	0.00583	0.0189007	0.003094	2.21e-05	7.16475e-05	0.0003094	2.21e-06	7.16475e-06	0.0004914	3.51e-06	1.13793e-05	0.0001582	1.13e-06	3.66342e-06	1.2278e-05	8.77e-08	2.84321e-07	2.198	0.0157	0.0508989	0.707	0.00505	0.0163719	7.028e-09	5.02e-11	1.62747e-10	0.04326	0.000309	0.00100177	1.0934e-11	7.81e-14	2.53198e-13
63107010	Banana, raw	Fruit	Fruits	Fruits	Plant-based, other	140	9.7259	0.02772	0.000198	0.00192573	0.02646	0.000189	0.0018382	0.011676	8.34e-05	0.00081114	0.2996	0.00214	0.0208134	0.0011298	8.07e-06	7.8488e-05	0.0002352	1.68e-06	1.63395e-05	0.0009954	7.11e-06	6.91512e-05	5.95e-05	4.25e-07	4.13351e-06	3.248e-05	2.32e-07	2.25641e-06	0.2268	0.00162	0.015756	0.1932	0.00138	0.0134217	2.002e-09	1.43e-11	1.3908e-10	0.0336	0.00024	0.00233422	4.256e-12	3.04e-14	2.95667e-13
75113000	Lettuce, raw	Vegetables	Vegetables	Vegetables, excluding starchy	Plant-based, other	85	10.5364	0.030345	0.000357	0.00376149	0.029155	0.000343	0.00361398	0.016745	0.000197	0.00207567	0.26095	0.00307	0.0323467	0.00060605	7.13e-06	7.51245e-05	0.00011475	1.35e-06	1.42241e-05	0.00015215	1.79e-06	1.88601e-05	2.1335e-05	2.51e-07	2.64464e-06	4.4285e-06	5.21e-08	5.48946e-07	0.17	0.002	0.0210728	0.1343	0.00158	0.0166475	2.9325e-09	3.45e-11	3.63506e-10	0.005372	6.32e-05	0.0006659	6.4175e-12	7.55e-14	7.95498e-13
83106000	Italian dressing, made with vinegar and oil	Fats and Oils	Fats and Oils	Oils	Plant-based, other	30	0.810492	0.093	0.0031	0.00251253	0.0918	0.00306	0.00248011	0.1746	0.00582	0.00471706	0.504	0.0168	0.0136163	0.000987	3.29e-05	2.66652e-05	0.0002271	7.57e-06	6.13542e-06	0.000564	1.88e-05	1.52373e-05	9.24e-05	3.08e-06	2.49632e-06	1.977e-05	6.59e-07	5.34114e-07	10.56	0.352	0.285293	0.516	0.0172	0.0139405	5.22e-09	1.74e-10	1.41026e-10	0.00693	0.000231	0.000187224	1.248e-11	4.16e-13	3.37165e-13
92552010	Fruit flavored drink, powdered, reconstituted, diet	Beverages, Nonalcoholic	Beverages, Nonalcoholic	Diet Beverages	Other	240	8.10491	0.000312	1.3e-06	1.05364e-05	0.0002976	1.24e-06	1.00501e-05	0.000468	1.95e-06	1.58046e-05	0.003144	1.31e-05	0.000106174	1.8072e-05	7.53e-08	6.103e-07	9.36e-07	3.9e-09	3.16091e-08	2.0016e-06	8.34e-09	6.75949e-08	4.92e-07	2.05e-09	1.66151e-08	1.3128e-07	5.47e-10	4.43339e-09	0.003192	1.33e-05	0.000107795	0.002712	1.13e-05	9.15855e-05	2.712e-11	1.13e-13	9.15855e-13	3.264e-05	1.36e-07	1.10227e-06	3.36e-14	1.4e-16	1.13469e-15
		Emissiosns from Diet								0.184716			0.144327			0.140468			1.16571			0.00169048			0.000497489			0.00126195			0.000381069			7.3425e-05			0.987021			1.82927			8.33166e-09			0.00704069			2.04791e-11
TABLE 6: EMISSION CALCULATION FOR S3M2
		Characteristics of select foods						Impact Categories
WWEIA Foodcode	Food Description	USDA Main Group	Food subgroup	HENI category	Main ingredient contributing to environmental impacts	RACC (g/serving)	Qty of Diet	Global warming, shorter term (kg CO2 eq/serving)			Global warming, long term (kg CO2 eq/serving)			Land occupation, biodiversity (ha-yr arable/serving)			Fossil energy use (MJ/serving)			Mineral resources use (kg deprived/serving)			Freshwater acidification (kg SO2 eq/serving)			Terrestrial acidification (kg SO2 eq/serving)			Freshwater eutrophication (kg PO4---P- eq/serving)			Marine eutrophication (kg N eq/serving)			Freshwater ecotoxicity (CTUe/serving)			Ionizing radiation (Bq C-14 eq/serving)			Ozone Layer Depletion (kg CFC-11 eq/serving)			Water use (m3/serving)			Photochemical oxidant formation (DALYs/serving)
								HH, EQ			HH, EQ			EQ									EQ			EQ			EQ			EQ			EQ			HH, EQ			HH, EQ						HH
								Mean	Factor	Future Food	Mean	Factor	FF	Mean	Factor	FF	Mean	Factor	FF	Mean	Factor	FF	Mean	Factor	FF	Mean	Factor	FF	Mean	Factor	FF	Mean	Factor	FF	Mean	Factor	FF	Mean	Factor	FF	Mean	Factor	FF	Mean	Factor	FF	Mean	Factor	FF
11111000	Milk, whole	Milk and Dairy	Dairy	Milk	Dairy	244	8.02042	0.62952	0.00258	0.0206927	0.40504	0.00166	0.0133139	0.29768	0.00122	0.00978492	2.03496	0.00834	0.0668903	0.0027328	1.12e-05	8.98288e-05	0.00102724	4.21e-06	3.3766e-05	0.0026596	1.09e-05	8.74226e-05	0.00025376	1.04e-06	8.34124e-06	8.906e-05	3.65e-07	2.92745e-06	1.70312	0.00698	0.0559826	3.172	0.013	0.104266	1.88856e-08	7.74e-11	6.20781e-10	0.0207888	8.52e-05	0.00068334	3.6844e-11	1.51e-13	1.21108e-12
21500100	Ground beef, cooked	Protein Foods	Beef	Red meat	Beef	85	2.43821	3.1705	0.0373	0.0909452	2.227	0.0262	0.0638811	2.227	0.0262	0.0638811	15.13	0.178	0.434001	0.024225	0.000285	0.00069489	0.0081855	9.63e-05	0.0002348	0.02431	0.000286	0.000697328	0.002346	2.76e-05	6.72946e-05	0.0008585	1.01e-05	2.46259e-05	9.605	0.113	0.275518	25.5	0.3	0.731463	1.2665e-07	1.49e-09	3.63293e-09	7.106e-05	8.36e-07	2.03834e-06	2.635e-10	3.1e-12	7.55845e-12
24144210	Chicken, drumstick, fried, no coating, skin eaten, NS as to type of fat added in cooking	Protein Foods	Poultry	Poultry	Poultry	85	2.21364	0.44115	0.00519	0.0114888	0.41395	0.00487	0.0107804	0.73865	0.00869	0.0192365	3.9865	0.0469	0.10382	0.005406	6.36e-05	0.000140787	0.0016235	1.91e-05	4.22805e-05	0.0048365	5.69e-05	0.000125956	0.00069615	8.19e-06	1.81297e-05	0.00016405	1.93e-06	4.27232e-06	2.2015	0.0259	0.0573332	4.352	0.0512	0.113338	3.74e-08	4.4e-10	9.74001e-10	0.02006	0.000236	0.000522419	5.4655e-11	6.43e-13	1.42337e-12
25221405	Pork sausage	Protein Foods	Processed meat	Cured Meats/Poultry	Processed meat	55	0.802042	0.3905	0.0071	0.0056945	0.2761	0.00502	0.00402625	0.2354	0.00428	0.00343274	4.3615	0.0793	0.063602	0.0027445	4.99e-05	4.00219e-05	0.0009295	1.69e-05	1.35545e-05	0.0028435	5.17e-05	4.14656e-05	0.0002904	5.28e-06	4.23478e-06	0.0001848	3.36e-06	2.69486e-06	1.408	0.0256	0.0205323	22.605	0.411	0.329639	1.8205e-08	3.31e-10	2.65476e-10	0.0627	0.00114	0.000914328	3.1075e-11	5.65e-13	4.53154e-13
26137120	Salmon, baked or broiled, made with oil	Protein Foods	Seafood	Seafood	Seafood	85	4.01021	0.68255	0.00803	0.032202	0.66555	0.00783	0.0314	0.3995	0.0047	0.018848	7.5905	0.0893	0.358112	0.005423	6.38e-05	0.000255852	0.0022015	2.59e-05	0.000103864	0.002856	3.36e-05	0.000134743	0.005474	6.44e-05	0.000258258	0.0006987	8.22e-06	3.29639e-05	2.8475	0.0335	0.134342	9.095	0.107	0.429093	3.1535e-08	3.71e-10	1.48779e-09	0.0034765	4.09e-05	0.000164018	1.496e-10	1.76e-12	7.05797e-12
31103010	Egg, whole, boiled or poached	Protein Foods	Eggs	Eggs	Animal-based (other)	50	1.20306	0.3385	0.00677	0.00814475	0.3325	0.00665	0.00800038	0.37	0.0074	0.00890268	1.775	0.0355	0.0427088	0.00765	0.000153	0.000184069	0.000755	1.51e-05	1.81663e-05	0.00177	3.54e-05	4.25885e-05	0.0002605	5.21e-06	6.26797e-06	5.9e-05	1.18e-06	1.41962e-06	2.425	0.0485	0.0583486	1.97	0.0394	0.0474007	1.9e-08	3.8e-10	4.57164e-10	0.01105	0.000221	0.000265877	3.315e-11	6.63e-13	7.97632e-13
41104020	Pinto, calico, or red Mexican beans, dry, cooked, fat not added in cooking	Protein Foods	Legumes	Legumes and soy products	Plant-based, other	90	0.962451	0.006975	7.75e-05	7.45899e-05	0.006795	7.55e-05	7.2665e-05	0.005319	5.91e-05	5.68809e-05	0.07803	0.000867	0.000834445	0.0003051	3.39e-06	3.26271e-06	3.753e-05	4.17e-07	4.01342e-07	5.76e-05	6.4e-07	6.15969e-07	8.289e-06	9.21e-08	8.86417e-08	2.304e-06	2.56e-08	2.46387e-08	0.03204	0.000356	0.000342633	0.1674	0.00186	0.00179016	3.402e-10	3.78e-12	3.63806e-12	0.005553	6.17e-05	5.93832e-05	2.781e-12	3.09e-14	2.97397e-14
42111200	Peanuts, dry roasted, salted	Protein Foods	Nuts and seeds	Nuts and seeds	Nuts and seeds	30	0.401021	0.0717	0.00239	0.000958441	0.0702	0.00234	0.00093839	0.1803	0.00601	0.00241014	0.318	0.0106	0.00425082	0.001044	3.48e-05	1.39555e-05	0.0002184	7.28e-06	2.91943e-06	0.000657	2.19e-05	8.78236e-06	7.59e-05	2.53e-06	1.01458e-06	2.121e-05	7.07e-07	2.83522e-07	0.2655	0.00885	0.00354904	0.1431	0.00477	0.00191287	3.27e-09	1.09e-10	4.37113e-11	0.00525	0.000175	7.01787e-05	7.23e-12	2.41e-13	9.66461e-14
56203010	Oatmeal, cooked, regular, fat not added in cooking	Grains	Grains	Cooked Cereals	Plant-based, other	234	4.41123	0.046566	0.000199	0.000877835	0.045396	0.000194	0.000855779	0.194688	0.000832	0.00367015	0.233064	0.000996	0.00439359	0.00075348	3.22e-06	1.42042e-05	0.00016848	7.2e-07	3.17609e-06	0.0004446	1.9e-06	8.38134e-06	0.000125892	5.38e-07	2.37324e-06	1.40166e-05	5.99e-08	2.64233e-07	0.37206	0.00159	0.00701386	0.13221	0.000565	0.00249235	2.808e-09	1.2e-11	5.29348e-11	0.0106236	4.54e-05	0.00020027	5.967e-12	2.55e-14	1.12486e-13
56205008	Rice, white, cooked, fat not added in cooking	Grains	Grains	Cooked Grains	Plant-based, other	140	3.20817	0.2044	0.00146	0.00468393	0.11886	0.000849	0.00272374	0.1337	0.000955	0.0030638	0.8162	0.00583	0.0187036	0.003094	2.21e-05	7.09006e-05	0.0003094	2.21e-06	7.09006e-06	0.0004914	3.51e-06	1.12607e-05	0.0001582	1.13e-06	3.62523e-06	1.2278e-05	8.77e-08	2.81356e-07	2.198	0.0157	0.0503683	0.707	0.00505	0.0162013	7.028e-09	5.02e-11	1.6105e-10	0.04326	0.000309	0.000991324	1.0934e-11	7.81e-14	2.50558e-13
63107010	Banana, raw	Fruit	Fruits	Fruits	Plant-based, other	140	9.62451	0.02772	0.000198	0.00190565	0.02646	0.000189	0.00181903	0.011676	8.34e-05	0.000802684	0.2996	0.00214	0.0205965	0.0011298	8.07e-06	7.76698e-05	0.0002352	1.68e-06	1.61692e-05	0.0009954	7.11e-06	6.84303e-05	5.95e-05	4.25e-07	4.09042e-06	3.248e-05	2.32e-07	2.23289e-06	0.2268	0.00162	0.0155917	0.1932	0.00138	0.0132818	2.002e-09	1.43e-11	1.3763e-10	0.0336	0.00024	0.00230988	4.256e-12	3.04e-14	2.92585e-13
75113000	Lettuce, raw	Vegetables	Vegetables	Vegetables, excluding starchy	Plant-based, other	85	10.4266	0.030345	0.000357	0.00372228	0.029155	0.000343	0.00357631	0.016745	0.000197	0.00205403	0.26095	0.00307	0.0320095	0.00060605	7.13e-06	7.43413e-05	0.00011475	1.35e-06	1.40758e-05	0.00015215	1.79e-06	1.86635e-05	2.1335e-05	2.51e-07	2.61706e-06	4.4285e-06	5.21e-08	5.43223e-07	0.17	0.002	0.0208531	0.1343	0.00158	0.016474	2.9325e-09	3.45e-11	3.59716e-10	0.005372	6.32e-05	0.000658958	6.4175e-12	7.55e-14	7.87205e-13
83106000	Italian dressing, made with vinegar and oil	Fats and Oils	Fats and Oils	Oils	Plant-based, other	30	0.802042	0.093	0.0031	0.00248633	0.0918	0.00306	0.00245425	0.1746	0.00582	0.00466789	0.504	0.0168	0.0134743	0.000987	3.29e-05	2.63872e-05	0.0002271	7.57e-06	6.07146e-06	0.000564	1.88e-05	1.50784e-05	9.24e-05	3.08e-06	2.47029e-06	1.977e-05	6.59e-07	5.28546e-07	10.56	0.352	0.282319	0.516	0.0172	0.0137951	5.22e-09	1.74e-10	1.39555e-10	0.00693	0.000231	0.000185272	1.248e-11	4.16e-13	3.3365e-13
92552010	Fruit flavored drink, powdered, reconstituted, diet	Beverages, Nonalcoholic	Beverages, Nonalcoholic	Diet Beverages	Other	240	8.02043	0.000312	1.3e-06	1.04266e-05	0.0002976	1.24e-06	9.94533e-06	0.000468	1.95e-06	1.56398e-05	0.003144	1.31e-05	0.000105068	1.8072e-05	7.53e-08	6.03938e-07	9.36e-07	3.9e-09	3.12797e-08	2.0016e-06	8.34e-09	6.68904e-08	4.92e-07	2.05e-09	1.64419e-08	1.3128e-07	5.47e-10	4.38718e-09	0.003192	1.33e-05	0.000106672	0.002712	1.13e-05	9.06309e-05	2.712e-11	1.13e-13	9.06309e-13	3.264e-05	1.36e-07	1.09078e-06	3.36e-14	1.4e-16	1.12286e-15
		Emissions from Diet								0.183887			0.143852			0.140827			1.1635			0.00168677			0.000496366			0.00126078			0.000378822			7.30669e-05			0.982201			1.82124			8.33729e-09			0.00702838			2.04057e-11
TABLE 7: EMISSION CALCULATION FOR S3M3
S3M3		Characteristics of select foods						Impact Categories
WWEIA Foodcode	Food Description	USDA Main Group	Food subgroup	HENI category	Main ingredient contributing to environmental impacts	RACC (g/serving)	Qty of Diet	Global warming, shorter term (kg CO2 eq/serving)			Global warming, long term (kg CO2 eq/serving)			Land occupation, biodiversity (ha-yr arable/serving)			Fossil energy use (MJ/serving)			Mineral resources use (kg deprived/serving)			Freshwater acidification (kg SO2 eq/serving)			Terrestrial acidification (kg SO2 eq/serving)			Freshwater eutrophication (kg PO4---P- eq/serving)			Marine eutrophication (kg N eq/serving)			Freshwater ecotoxicity (CTUe/serving)			Ionizing radiation (Bq C-14 eq/serving)			Ozone Layer Depletion (kg CFC-11 eq/serving)			Water use (m3/serving)			Photochemical oxidant formation (DALYs/serving)
								HH, EQ			HH, EQ			EQ									EQ			EQ			EQ			EQ			EQ			HH, EQ			HH, EQ						HH
								Mean	Factor	Future Food	Mean	Factor	FF	Mean	Factor	FF	Mean	Factor	FF	Mean	Factor	FF	Mean	Factor	FF	Mean	Factor	FF	Mean	Factor	FF	Mean	Factor	FF	Mean	Factor	FF	Mean	Factor	FF	Mean	Factor	FF	Mean	Factor	FF	Mean	Factor	FF
11111000	Milk, whole	Milk and Dairy	Dairy	Milk	Dairy	244	7.93351	0.62952	0.00258	0.0204685	0.40504	0.00166	0.0131696	0.29768	0.00122	0.00967889	2.03496	0.00834	0.0661655	0.0027328	1.12e-05	8.88553e-05	0.00102724	4.21e-06	3.34001e-05	0.0026596	1.09e-05	8.64753e-05	0.00025376	1.04e-06	8.25085e-06	8.906e-05	3.65e-07	2.89573e-06	1.70312	0.00698	0.0553759	3.172	0.013	0.103136	1.88856e-08	7.74e-11	6.14054e-10	0.0207888	8.52e-05	0.000675935	3.6844e-11	1.51e-13	1.19796e-12
21500100	Ground beef, cooked	Protein Foods	Beef	Red meat	Beef	85	2.41179	3.1705	0.0373	0.0899597	2.227	0.0262	0.0631888	2.227	0.0262	0.0631888	15.13	0.178	0.429298	0.024225	0.000285	0.00068736	0.0081855	9.63e-05	0.000232255	0.02431	0.000286	0.000689771	0.002346	2.76e-05	6.65654e-05	0.0008585	1.01e-05	2.43591e-05	9.605	0.113	0.272532	25.5	0.3	0.723536	1.2665e-07	1.49e-09	3.59356e-09	7.106e-05	8.36e-07	2.01625e-06	2.635e-10	3.1e-12	7.47654e-12
24144210	Chicken, drumstick, fried, no coating, skin eaten, NS as to type of fat added in cooking	Protein Foods	Poultry	Poultry	Poultry	85	2.18965	0.44115	0.00519	0.0113643	0.41395	0.00487	0.0106636	0.73865	0.00869	0.019028	3.9865	0.0469	0.102695	0.005406	6.36e-05	0.000139262	0.0016235	1.91e-05	4.18223e-05	0.0048365	5.69e-05	0.000124591	0.00069615	8.19e-06	1.79332e-05	0.00016405	1.93e-06	4.22602e-06	2.2015	0.0259	0.0567119	4.352	0.0512	0.11211	3.74e-08	4.4e-10	9.63446e-10	0.02006	0.000236	0.000516757	5.4655e-11	6.43e-13	1.40794e-12
25221405	Pork sausage	Protein Foods	Processed meat	Cured Meats/Poultry	Processed meat	55	1.26936	0.3905	0.0071	0.00901247	0.2761	0.00502	0.0063722	0.2354	0.00428	0.00543287	4.3615	0.0793	0.10066	0.0027445	4.99e-05	6.33412e-05	0.0009295	1.69e-05	2.14522e-05	0.0028435	5.17e-05	6.5626e-05	0.0002904	5.28e-06	6.70223e-06	0.0001848	3.36e-06	4.26506e-06	1.408	0.0256	0.0324957	22.605	0.411	0.521708	1.8205e-08	3.31e-10	4.20159e-10	0.0627	0.00114	0.00144707	3.1075e-11	5.65e-13	7.1719e-13
26137120	Salmon, baked or broiled, made with oil	Protein Foods	Seafood	Seafood	Seafood	85	3.96676	0.68255	0.00803	0.0318531	0.66555	0.00783	0.0310597	0.3995	0.0047	0.0186438	7.5905	0.0893	0.354231	0.005423	6.38e-05	0.000253079	0.0022015	2.59e-05	0.000102739	0.002856	3.36e-05	0.000133283	0.005474	6.44e-05	0.000255459	0.0006987	8.22e-06	3.26067e-05	2.8475	0.0335	0.132886	9.095	0.107	0.424443	3.1535e-08	3.71e-10	1.47167e-09	0.0034765	4.09e-05	0.00016224	1.496e-10	1.76e-12	6.98149e-12
31103010	Egg, whole, boiled or poached	Protein Foods	Eggs	Eggs	Animal-based (other)	50	1.19003	0.3385	0.00677	0.00805648	0.3325	0.00665	0.00791368	0.37	0.0074	0.0088062	1.775	0.0355	0.0422459	0.00765	0.000153	0.000182074	0.000755	1.51e-05	1.79694e-05	0.00177	3.54e-05	4.21269e-05	0.0002605	5.21e-06	6.20004e-06	5.9e-05	1.18e-06	1.40423e-06	2.425	0.0485	0.0577163	1.97	0.0394	0.046887	1.9e-08	3.8e-10	4.5221e-10	0.01105	0.000221	0.000262996	3.315e-11	6.63e-13	7.88988e-13
41104020	Pinto, calico, or red Mexican beans, dry, cooked, fat not added in cooking	Protein Foods	Legumes	Legumes and soy products	Plant-based, other	90	1.26936	0.006975	7.75e-05	9.83756e-05	0.006795	7.55e-05	9.58368e-05	0.005319	5.91e-05	7.50193e-05	0.07803	0.000867	0.00110054	0.0003051	3.39e-06	4.30314e-06	3.753e-05	4.17e-07	5.29324e-07	5.76e-05	6.4e-07	8.12392e-07	8.289e-06	9.21e-08	1.16908e-07	2.304e-06	2.56e-08	3.24957e-08	0.03204	0.000356	0.000451893	0.1674	0.00186	0.00236101	3.402e-10	3.78e-12	4.79819e-12	0.005553	6.17e-05	7.83196e-05	2.781e-12	3.09e-14	3.92233e-14
42111200	Peanuts, dry roasted, salted	Protein Foods	Nuts and seeds	Nuts and seeds	Nuts and seeds	30	0.396676	0.0717	0.00239	0.000948055	0.0702	0.00234	0.000928221	0.1803	0.00601	0.00238402	0.318	0.0106	0.00420476	0.001044	3.48e-05	1.38043e-05	0.0002184	7.28e-06	2.8878e-06	0.000657	2.19e-05	8.6872e-06	7.59e-05	2.53e-06	1.00359e-06	2.121e-05	7.07e-07	2.8045e-07	0.2655	0.00885	0.00351058	0.1431	0.00477	0.00189214	3.27e-09	1.09e-10	4.32376e-11	0.00525	0.000175	6.94182e-05	7.23e-12	2.41e-13	9.55988e-14
56203010	Oatmeal, cooked, regular, fat not added in cooking	Grains	Grains	Cooked Cereals	Plant-based, other	234	2.86961	0.046566	0.000199	0.000571053	0.045396	0.000194	0.000556705	0.194688	0.000832	0.00238752	0.233064	0.000996	0.00285813	0.00075348	3.22e-06	9.24015e-06	0.00016848	7.2e-07	2.06612e-06	0.0004446	1.9e-06	5.45226e-06	0.000125892	5.38e-07	1.54385e-06	1.40166e-05	5.99e-08	1.7189e-07	0.37206	0.00159	0.00456268	0.13221	0.000565	0.00162133	2.808e-09	1.2e-11	3.44353e-11	0.0106236	4.54e-05	0.00013028	5.967e-12	2.55e-14	7.31751e-14
56205008	Rice, white, cooked, fat not added in cooking	Grains	Grains	Cooked Grains	Plant-based, other	140	3.17341	0.2044	0.00146	0.00463317	0.11886	0.000849	0.00269422	0.1337	0.000955	0.0030306	0.8162	0.00583	0.018501	0.003094	2.21e-05	7.01323e-05	0.0003094	2.21e-06	7.01323e-06	0.0004914	3.51e-06	1.11387e-05	0.0001582	1.13e-06	3.58595e-06	1.2278e-05	8.77e-08	2.78308e-07	2.198	0.0157	0.0498225	0.707	0.00505	0.0160257	7.028e-09	5.02e-11	1.59305e-10	0.04326	0.000309	0.000980582	1.0934e-11	7.81e-14	2.47843e-13
63107010	Banana, raw	Fruit	Fruits	Fruits	Plant-based, other	140	9.52022	0.02772	0.000198	0.001885	0.02646	0.000189	0.00179932	0.011676	8.34e-05	0.000793986	0.2996	0.00214	0.0203733	0.0011298	8.07e-06	7.68281e-05	0.0002352	1.68e-06	1.5994e-05	0.0009954	7.11e-06	6.76887e-05	5.95e-05	4.25e-07	4.04609e-06	3.248e-05	2.32e-07	2.20869e-06	0.2268	0.00162	0.0154227	0.1932	0.00138	0.0131379	2.002e-09	1.43e-11	1.36139e-10	0.0336	0.00024	0.00228485	4.256e-12	3.04e-14	2.89415e-13
75113000	Lettuce, raw	Vegetables	Vegetables	Vegetables, excluding starchy	Plant-based, other	85	10.3136	0.030345	0.000357	0.00368194	0.029155	0.000343	0.00353755	0.016745	0.000197	0.00203177	0.26095	0.00307	0.0316627	0.00060605	7.13e-06	7.35357e-05	0.00011475	1.35e-06	1.39233e-05	0.00015215	1.79e-06	1.84613e-05	2.1335e-05	2.51e-07	2.58871e-06	4.4285e-06	5.21e-08	5.37337e-07	0.17	0.002	0.0206271	0.1343	0.00158	0.0162954	2.9325e-09	3.45e-11	3.55818e-10	0.005372	6.32e-05	0.000651817	6.4175e-12	7.55e-14	7.78674e-13
83106000	Italian dressing, made with vinegar and oil	Fats and Oils	Fats and Oils	Oils	Plant-based, other	30	0.793351	0.093	0.0031	0.00245939	0.0918	0.00306	0.00242766	0.1746	0.00582	0.0046173	0.504	0.0168	0.0133283	0.000987	3.29e-05	2.61013e-05	0.0002271	7.57e-06	6.00567e-06	0.000564	1.88e-05	1.4915e-05	9.24e-05	3.08e-06	2.44352e-06	1.977e-05	6.59e-07	5.22819e-07	10.56	0.352	0.27926	0.516	0.0172	0.0136456	5.22e-09	1.74e-10	1.38043e-10	0.00693	0.000231	0.000183264	1.248e-11	4.16e-13	3.30034e-13
92552010	Fruit flavored drink, powdered, reconstituted, diet	Beverages, Nonalcoholic	Beverages, Nonalcoholic	Diet Beverages	Other	240	7.93351	0.000312	1.3e-06	1.03136e-05	0.0002976	1.24e-06	9.83755e-06	0.000468	1.95e-06	1.54703e-05	0.003144	1.31e-05	0.000103929	1.8072e-05	7.53e-08	5.97393e-07	9.36e-07	3.9e-09	3.09407e-08	2.0016e-06	8.34e-09	6.61655e-08	4.92e-07	2.05e-09	1.62637e-08	1.3128e-07	5.47e-10	4.33963e-09	0.003192	1.33e-05	0.000105516	0.002712	1.13e-05	8.96487e-05	2.712e-11	1.13e-13	8.96487e-13	3.264e-05	1.36e-07	1.07896e-06	3.36e-14	1.4e-16	1.11069e-15
			Emissions from Diet							0.185002			0.144417			0.140114			1.18743			0.00168851			0.000498089			0.0012691			0.000376456			7.37932e-05			0.981481			1.99689			8.38777e-09			0.00744663			2.04252e-11
TABLE 8: EMISSION CALCULATION FOR S4M1
		Characteristics of select foods						Impact Categories
WWEIA Foodcode	Food Description	USDA Main Group	Food subgroup	HENI category	Main ingredient contributing to environmental impacts	RACC (g/serving)	Qty of Diet	Global warming, shorter term (kg CO2 eq/serving)			Global warming, long term (kg CO2 eq/serving)			Land occupation, biodiversity (ha-yr arable/serving)			Fossil energy use (MJ/serving)			Mineral resources use (kg deprived/serving)			Freshwater acidification (kg SO2 eq/serving)			Terrestrial acidification (kg SO2 eq/serving)			Freshwater eutrophication (kg PO4---P- eq/serving)			Marine eutrophication (kg N eq/serving)			Freshwater ecotoxicity (CTUe/serving)			Ionizing radiation (Bq C-14 eq/serving)			Ozone Layer Depletion (kg CFC-11 eq/serving)			Water use (m3/serving)			Photochemical oxidant formation (DALYs/serving)
								HH, EQ			HH, EQ			EQ									EQ			EQ			EQ			EQ			EQ			HH, EQ			HH, EQ						HH
								Mean	Factor	Future Food	Mean	Factor	FF	Mean	Factor	FF	Mean	Factor	FF	Mean	Factor	FF	Mean	Factor	FF	Mean	Factor	FF	Mean	Factor	FF	Mean	Factor	FF	Mean	Factor	FF	Mean	Factor	FF	Mean	Factor	FF	Mean	Factor	FF	Mean	Factor	FF
11111000	Milk, whole	Milk and Dairy	Dairy	Milk	Dairy	244	8.02548	0.62952	0.00258	0.0207057	0.40504	0.00166	0.0133223	0.29768	0.00122	0.00979109	2.03496	0.00834	0.0669325	0.0027328	1.12e-05	8.98854e-05	0.00102724	4.21e-06	3.37873e-05	0.0026596	1.09e-05	8.74777e-05	0.00025376	1.04e-06	8.3465e-06	8.906e-05	3.65e-07	2.9293e-06	1.70312	0.00698	0.0560179	3.172	0.013	0.104331	1.88856e-08	7.74e-11	6.21172e-10	0.0207888	8.52e-05	0.000683771	3.6844e-11	1.51e-13	1.21185e-12
21500100	Ground beef, cooked	Protein Foods	Beef	Red meat	Beef	85	2.05452	3.1705	0.0373	0.0766337	2.227	0.0262	0.0538285	2.227	0.0262	0.0538285	15.13	0.178	0.365705	0.024225	0.000285	0.000585539	0.0081855	9.63e-05	0.000197851	0.02431	0.000286	0.000587594	0.002346	2.76e-05	5.67048e-05	0.0008585	1.01e-05	2.07507e-05	9.605	0.113	0.232161	25.5	0.3	0.616357	1.2665e-07	1.49e-09	3.06124e-09	7.106e-05	8.36e-07	1.71758e-06	2.635e-10	3.1e-12	6.36902e-12
24144210	Chicken, drumstick, fried, no coating, skin eaten, NS as to type of fat added in cooking	Protein Foods	Poultry	Poultry	Poultry	85	2.00637	0.44115	0.00519	0.0104131	0.41395	0.00487	0.00977102	0.73865	0.00869	0.0174353	3.9865	0.0469	0.0940987	0.005406	6.36e-05	0.000127605	0.0016235	1.91e-05	3.83216e-05	0.0048365	5.69e-05	0.000114162	0.00069615	8.19e-06	1.64322e-05	0.00016405	1.93e-06	3.87229e-06	2.2015	0.0259	0.051965	4.352	0.0512	0.102726	3.74e-08	4.4e-10	8.82802e-10	0.02006	0.000236	0.000473503	5.4655e-11	6.43e-13	1.2901e-12
25221405	Pork sausage	Protein Foods	Processed meat	Cured Meats/Poultry	Processed meat	55	0.802548	0.3905	0.0071	0.00569809	0.2761	0.00502	0.00402879	0.2354	0.00428	0.00343491	4.3615	0.0793	0.0636421	0.0027445	4.99e-05	4.00472e-05	0.0009295	1.69e-05	1.35631e-05	0.0028435	5.17e-05	4.14917e-05	0.0002904	5.28e-06	4.23745e-06	0.0001848	3.36e-06	2.69656e-06	1.408	0.0256	0.0205452	22.605	0.411	0.329847	1.8205e-08	3.31e-10	2.65643e-10	0.0627	0.00114	0.000914905	3.1075e-11	5.65e-13	4.5344e-13
26137120	Salmon, baked or broiled, made with oil	Protein Foods	Seafood	Seafood	Seafood	85	4.01274	0.68255	0.00803	0.0322223	0.66555	0.00783	0.0314198	0.3995	0.0047	0.0188599	7.5905	0.0893	0.358338	0.005423	6.38e-05	0.000256013	0.0022015	2.59e-05	0.00010393	0.002856	3.36e-05	0.000134828	0.005474	6.44e-05	0.00025842	0.0006987	8.22e-06	3.29847e-05	2.8475	0.0335	0.134427	9.095	0.107	0.429363	3.1535e-08	3.71e-10	1.48873e-09	0.0034765	4.09e-05	0.000164121	1.496e-10	1.76e-12	7.06242e-12
31103010	Egg, whole, boiled or poached	Protein Foods	Eggs	Eggs	Animal-based (other)	50	1.18856	0.3385	0.00677	0.00804655	0.3325	0.00665	0.00790392	0.37	0.0074	0.00879534	1.775	0.0355	0.0421939	0.00765	0.000153	0.00018185	0.000755	1.51e-05	1.79472e-05	0.00177	3.54e-05	4.2075e-05	0.0002605	5.21e-06	6.19239e-06	5.9e-05	1.18e-06	1.4025e-06	2.425	0.0485	0.0576451	1.97	0.0394	0.0468292	1.9e-08	3.8e-10	4.51653e-10	0.01105	0.000221	0.000262672	3.315e-11	6.63e-13	7.88015e-13
41104020	Pinto, calico, or red Mexican beans, dry, cooked, fat not added in cooking	Protein Foods	Legumes	Legumes and soy products	Plant-based, other	90	1.15567	0.006975	7.75e-05	8.95644e-05	0.006795	7.55e-05	8.7253e-05	0.005319	5.91e-05	6.83001e-05	0.07803	0.000867	0.00100197	0.0003051	3.39e-06	3.91772e-06	3.753e-05	4.17e-07	4.81914e-07	5.76e-05	6.4e-07	7.39628e-07	8.289e-06	9.21e-08	1.06437e-07	2.304e-06	2.56e-08	2.95851e-08	0.03204	0.000356	0.000411418	0.1674	0.00186	0.00214954	3.402e-10	3.78e-12	4.36843e-12	0.005553	6.17e-05	7.13048e-05	2.781e-12	3.09e-14	3.57102e-14
42111200	Peanuts, dry roasted, salted	Protein Foods	Nuts and seeds	Nuts and seeds	Nuts and seeds	30	0.401274	0.0717	0.00239	0.000959045	0.0702	0.00234	0.000938981	0.1803	0.00601	0.00241166	0.318	0.0106	0.00425351	0.001044	3.48e-05	1.39643e-05	0.0002184	7.28e-06	2.92128e-06	0.000657	2.19e-05	8.7879e-06	7.59e-05	2.53e-06	1.01522e-06	2.121e-05	7.07e-07	2.83701e-07	0.2655	0.00885	0.00355128	0.1431	0.00477	0.00191408	3.27e-09	1.09e-10	4.37389e-11	0.00525	0.000175	7.0223e-05	7.23e-12	2.41e-13	9.6707e-14
56203010	Oatmeal, cooked, regular, fat not added in cooking	Grains	Grains	Cooked Cereals	Plant-based, other	234	4.41401	0.046566	0.000199	0.000878389	0.045396	0.000194	0.000856319	0.194688	0.000832	0.00367246	0.233064	0.000996	0.00439636	0.00075348	3.22e-06	1.42131e-05	0.00016848	7.2e-07	3.17809e-06	0.0004446	1.9e-06	8.38663e-06	0.000125892	5.38e-07	2.37474e-06	1.40166e-05	5.99e-08	2.64399e-07	0.37206	0.00159	0.00701828	0.13221	0.000565	0.00249392	2.808e-09	1.2e-11	5.29682e-11	0.0106236	4.54e-05	0.000200396	5.967e-12	2.55e-14	1.12557e-13
56205008	Rice, white, cooked, fat not added in cooking	Grains	Grains	Cooked Grains	Plant-based, other	140	3.21019	0.2044	0.00146	0.00468688	0.11886	0.000849	0.00272545	0.1337	0.000955	0.00306573	0.8162	0.00583	0.0187154	0.003094	2.21e-05	7.09453e-05	0.0003094	2.21e-06	7.09453e-06	0.0004914	3.51e-06	1.12678e-05	0.0001582	1.13e-06	3.62752e-06	1.2278e-05	8.77e-08	2.81534e-07	2.198	0.0157	0.0504	0.707	0.00505	0.0162115	7.028e-09	5.02e-11	1.61152e-10	0.04326	0.000309	0.000991949	1.0934e-11	7.81e-14	2.50716e-13
63107010	Banana, raw	Fruit	Fruits	Fruits	Plant-based, other	140	9.63058	0.02772	0.000198	0.00190685	0.02646	0.000189	0.00182018	0.011676	8.34e-05	0.00080319	0.2996	0.00214	0.0206094	0.0011298	8.07e-06	7.77188e-05	0.0002352	1.68e-06	1.61794e-05	0.0009954	7.11e-06	6.84734e-05	5.95e-05	4.25e-07	4.093e-06	3.248e-05	2.32e-07	2.23429e-06	0.2268	0.00162	0.0156015	0.1932	0.00138	0.0132902	2.002e-09	1.43e-11	1.37717e-10	0.0336	0.00024	0.00231134	4.256e-12	3.04e-14	2.9277e-13
75113000	Lettuce, raw	Vegetables	Vegetables	Vegetables, excluding starchy	Plant-based, other	85	10.4331	0.030345	0.000357	0.00372463	0.029155	0.000343	0.00357856	0.016745	0.000197	0.00205533	0.26095	0.00307	0.0320297	0.00060605	7.13e-06	7.43882e-05	0.00011475	1.35e-06	1.40847e-05	0.00015215	1.79e-06	1.86753e-05	2.1335e-05	2.51e-07	2.61871e-06	4.4285e-06	5.21e-08	5.43566e-07	0.17	0.002	0.0208663	0.1343	0.00158	0.0164843	2.9325e-09	3.45e-11	3.59943e-10	0.005372	6.32e-05	0.000659374	6.4175e-12	7.55e-14	7.87701e-13
83106000	Italian dressing, made with vinegar and oil	Fats and Oils	Fats and Oils	Oils	Plant-based, other	30	0.802548	0.093	0.0031	0.0024879	0.0918	0.00306	0.0024558	0.1746	0.00582	0.00467083	0.504	0.0168	0.0134828	0.000987	3.29e-05	2.64038e-05	0.0002271	7.57e-06	6.07529e-06	0.000564	1.88e-05	1.50879e-05	9.24e-05	3.08e-06	2.47185e-06	1.977e-05	6.59e-07	5.28879e-07	10.56	0.352	0.282497	0.516	0.0172	0.0138038	5.22e-09	1.74e-10	1.39643e-10	0.00693	0.000231	0.000185389	1.248e-11	4.16e-13	3.3386e-13
92552010	Fruit flavored drink, powdered, reconstituted, diet	Beverages, Nonalcoholic	Beverages, Nonalcoholic	Diet Beverages	Other	240	8.02548	0.000312	1.3e-06	1.04331e-05	0.0002976	1.24e-06	9.95159e-06	0.000468	1.95e-06	1.56497e-05	0.003144	1.31e-05	0.000105134	1.8072e-05	7.53e-08	6.04318e-07	9.36e-07	3.9e-09	3.12994e-08	2.0016e-06	8.34e-09	6.69325e-08	4.92e-07	2.05e-09	1.64522e-08	1.3128e-07	5.47e-10	4.38994e-09	0.003192	1.33e-05	0.000106739	0.002712	1.13e-05	9.06879e-05	2.712e-11	1.13e-13	9.06879e-13	3.264e-05	1.36e-07	1.09146e-06	3.36e-14	1.4e-16	1.12357e-15
		Emissions from Diet								0.168463			0.132747			0.128908			1.0855			0.00156309			0.000455446			0.00113911			0.000366658			6.88064e-05			0.933214			1.69589			7.67167e-09			0.00699175			1.9086e-11
TABLE 9: EMISSION CALCULATION FOR S4M2
S4M2
		Characteristics of select foods						Impact Categories
WWEIA Foodcode	Food Description	USDA Main Group	Food subgroup	HENI category	Main ingredient contributing to environmental impacts	RACC (g/serving)	Qty of Diet	Global warming, shorter term (kg CO2 eq/serving)			Global warming, long term (kg CO2 eq/serving)			Land occupation, biodiversity (ha-yr arable/serving)			Fossil energy use (MJ/serving)			Mineral resources use (kg deprived/serving)			Freshwater acidification (kg SO2 eq/serving)			Terrestrial acidification (kg SO2 eq/serving)			Freshwater eutrophication (kg PO4---P- eq/serving)			Marine eutrophication (kg N eq/serving)			Freshwater ecotoxicity (CTUe/serving)			Ionizing radiation (Bq C-14 eq/serving)			Ozone Layer Depletion (kg CFC-11 eq/serving)			Water use (m3/serving)			Photochemical oxidant formation (DALYs/serving)
								HH, EQ			HH, EQ			EQ									EQ			EQ			EQ			EQ			EQ			HH, EQ			HH, EQ						HH
								Mean	Factor	Future Food	Mean	Factor	FF	Mean	Factor	FF	Mean	Factor	FF	Mean	Factor	FF	Mean	Factor	FF	Mean	Factor	FF	Mean	Factor	FF	Mean	Factor	FF	Mean	Factor	FF	Mean	Factor	FF	Mean	Factor	FF	Mean	Factor	FF	Mean	Factor	FF
11111000	Milk, whole	Milk and Dairy	Dairy	Milk	Dairy	244	7.96555	0.62952	0.00258	0.0205511	0.40504	0.00166	0.0132228	0.29768	0.00122	0.00971797	2.03496	0.00834	0.0664326	0.0027328	1.12e-05	8.92141e-05	0.00102724	4.21e-06	3.35349e-05	0.0026596	1.09e-05	8.68244e-05	0.00025376	1.04e-06	8.28417e-06	8.906e-05	3.65e-07	2.90742e-06	1.70312	0.00698	0.0555995	3.172	0.013	0.103552	1.88856e-08	7.74e-11	6.16533e-10	0.0207888	8.52e-05	0.000678664	3.6844e-11	1.51e-13	1.2028e-12
21500100	Ground beef, cooked	Protein Foods	Beef	Red meat	Beef	85	2.03918	3.1705	0.0373	0.0760614	2.227	0.0262	0.0534265	2.227	0.0262	0.0534265	15.13	0.178	0.362974	0.024225	0.000285	0.000581166	0.0081855	9.63e-05	0.000196373	0.02431	0.000286	0.000583205	0.002346	2.76e-05	5.62814e-05	0.0008585	1.01e-05	2.05957e-05	9.605	0.113	0.230427	25.5	0.3	0.611754	1.2665e-07	1.49e-09	3.03838e-09	7.106e-05	8.36e-07	1.70475e-06	2.635e-10	3.1e-12	6.32146e-12
24144210	Chicken, drumstick, fried, no coating, skin eaten, NS as to type of fat added in cooking	Protein Foods	Poultry	Poultry	Poultry	85	2.1029	0.44115	0.00519	0.0109141	0.41395	0.00487	0.0102411	0.73865	0.00869	0.0182742	3.9865	0.0469	0.0986261	0.005406	6.36e-05	0.000133745	0.0016235	1.91e-05	4.01654e-05	0.0048365	5.69e-05	0.000119655	0.00069615	8.19e-06	1.72228e-05	0.00016405	1.93e-06	4.0586e-06	2.2015	0.0259	0.0544652	4.352	0.0512	0.107669	3.74e-08	4.4e-10	9.25277e-10	0.02006	0.000236	0.000496285	5.4655e-11	6.43e-13	1.35217e-12
25221405	Pork sausage	Protein Foods	Processed meat	Cured Meats/Poultry	Processed meat	55	0.796555	0.3905	0.0071	0.00565554	0.2761	0.00502	0.0039987	0.2354	0.00428	0.00340925	4.3615	0.0793	0.0631668	0.0027445	4.99e-05	3.97481e-05	0.0009295	1.69e-05	1.34618e-05	0.0028435	5.17e-05	4.11819e-05	0.0002904	5.28e-06	4.20581e-06	0.0001848	3.36e-06	2.67642e-06	1.408	0.0256	0.0203918	22.605	0.411	0.327384	1.8205e-08	3.31e-10	2.6366e-10	0.0627	0.00114	0.000908072	3.1075e-11	5.65e-13	4.50053e-13
26137120	Salmon, baked or broiled, made with oil	Protein Foods	Seafood	Seafood	Seafood	85	3.98277	0.68255	0.00803	0.0319817	0.66555	0.00783	0.0311851	0.3995	0.0047	0.018719	7.5905	0.0893	0.355662	0.005423	6.38e-05	0.000254101	0.0022015	2.59e-05	0.000103154	0.002856	3.36e-05	0.000133821	0.005474	6.44e-05	0.000256491	0.0006987	8.22e-06	3.27384e-05	2.8475	0.0335	0.133423	9.095	0.107	0.426157	3.1535e-08	3.71e-10	1.47761e-09	0.0034765	4.09e-05	0.000162895	1.496e-10	1.76e-12	7.00968e-12
31103010	Egg, whole, boiled or poached	Protein Foods	Eggs	Eggs	Animal-based (other)	50	1.19483	0.3385	0.00677	0.008089	0.3325	0.00665	0.00794562	0.37	0.0074	0.00884175	1.775	0.0355	0.0424165	0.00765	0.000153	0.000182809	0.000755	1.51e-05	1.80419e-05	0.00177	3.54e-05	4.2297e-05	0.0002605	5.21e-06	6.22507e-06	5.9e-05	1.18e-06	1.4099e-06	2.425	0.0485	0.0579493	1.97	0.0394	0.0470763	1.9e-08	3.8e-10	4.54036e-10	0.01105	0.000221	0.000264058	3.315e-11	6.63e-13	7.92173e-13
41104020	Pinto, calico, or red Mexican beans, dry, cooked, fat not added in cooking	Protein Foods	Legumes	Legumes and soy products	Plant-based, other	90	1.4338	0.006975	7.75e-05	0.000111119	0.006795	7.55e-05	0.000108252	0.005319	5.91e-05	8.47375e-05	0.07803	0.000867	0.0012431	0.0003051	3.39e-06	4.86058e-06	3.753e-05	4.17e-07	5.97894e-07	5.76e-05	6.4e-07	9.17631e-07	8.289e-06	9.21e-08	1.32053e-07	2.304e-06	2.56e-08	3.67052e-08	0.03204	0.000356	0.000510432	0.1674	0.00186	0.00266686	3.402e-10	3.78e-12	5.41976e-12	0.005553	6.17e-05	8.84653e-05	2.781e-12	3.09e-14	4.43044e-14
42111200	Peanuts, dry roasted, salted	Protein Foods	Nuts and seeds	Nuts and seeds	Nuts and seeds	30	0.398277	0.0717	0.00239	0.000951883	0.0702	0.00234	0.000931969	0.1803	0.00601	0.00239365	0.318	0.0106	0.00422174	0.001044	3.48e-05	1.386e-05	0.0002184	7.28e-06	2.89946e-06	0.000657	2.19e-05	8.72227e-06	7.59e-05	2.53e-06	1.00764e-06	2.121e-05	7.07e-07	2.81582e-07	0.2655	0.00885	0.00352475	0.1431	0.00477	0.00189978	3.27e-09	1.09e-10	4.34122e-11	0.00525	0.000175	6.96985e-05	7.23e-12	2.41e-13	9.59848e-14
56203010	Oatmeal, cooked, regular, fat not added in cooking	Grains	Grains	Cooked Cereals	Plant-based, other	234	4.38105	0.046566	0.000199	0.000871829	0.045396	0.000194	0.000849924	0.194688	0.000832	0.00364503	0.233064	0.000996	0.00436353	0.00075348	3.22e-06	1.4107e-05	0.00016848	7.2e-07	3.15436e-06	0.0004446	1.9e-06	8.324e-06	0.000125892	5.38e-07	2.357e-06	1.40166e-05	5.99e-08	2.62425e-07	0.37206	0.00159	0.00696587	0.13221	0.000565	0.00247529	2.808e-09	1.2e-11	5.25726e-11	0.0106236	4.54e-05	0.0001989	5.967e-12	2.55e-14	1.11717e-13
56205008	Rice, white, cooked, fat not added in cooking	Grains	Grains	Cooked Grains	Plant-based, other	140	3.18622	0.2044	0.00146	0.00465188	0.11886	0.000849	0.0027051	0.1337	0.000955	0.00304284	0.8162	0.00583	0.0185757	0.003094	2.21e-05	7.04154e-05	0.0003094	2.21e-06	7.04154e-06	0.0004914	3.51e-06	1.11836e-05	0.0001582	1.13e-06	3.60043e-06	1.2278e-05	8.77e-08	2.79431e-07	2.198	0.0157	0.0500236	0.707	0.00505	0.0160904	7.028e-09	5.02e-11	1.59948e-10	0.04326	0.000309	0.000984541	1.0934e-11	7.81e-14	2.48844e-13
63107010	Banana, raw	Fruit	Fruits	Fruits	Plant-based, other	140	9.55865	0.02772	0.000198	0.00189261	0.02646	0.000189	0.00180659	0.011676	8.34e-05	0.000797192	0.2996	0.00214	0.0204555	0.0011298	8.07e-06	7.71383e-05	0.0002352	1.68e-06	1.60585e-05	0.0009954	7.11e-06	6.7962e-05	5.95e-05	4.25e-07	4.06243e-06	3.248e-05	2.32e-07	2.21761e-06	0.2268	0.00162	0.015485	0.1932	0.00138	0.0131909	2.002e-09	1.43e-11	1.36689e-10	0.0336	0.00024	0.00229408	4.256e-12	3.04e-14	2.90583e-13
75113000	Lettuce, raw	Vegetables	Vegetables	Vegetables, excluding starchy	Plant-based, other	85	10.3552	0.030345	0.000357	0.00369681	0.029155	0.000343	0.00355184	0.016745	0.000197	0.00203998	0.26095	0.00307	0.0317905	0.00060605	7.13e-06	7.38326e-05	0.00011475	1.35e-06	1.39795e-05	0.00015215	1.79e-06	1.85358e-05	2.1335e-05	2.51e-07	2.59916e-06	4.4285e-06	5.21e-08	5.39506e-07	0.17	0.002	0.0207104	0.1343	0.00158	0.0163612	2.9325e-09	3.45e-11	3.57255e-10	0.005372	6.32e-05	0.000654449	6.4175e-12	7.55e-14	7.81818e-13
83106000	Italian dressing, made with vinegar and oil	Fats and Oils	Fats and Oils	Oils	Plant-based, other	30	0.796555	0.093	0.0031	0.00246932	0.0918	0.00306	0.00243746	0.1746	0.00582	0.00463595	0.504	0.0168	0.0133821	0.000987	3.29e-05	2.62066e-05	0.0002271	7.57e-06	6.02992e-06	0.000564	1.88e-05	1.49752e-05	9.24e-05	3.08e-06	2.45339e-06	1.977e-05	6.59e-07	5.24929e-07	10.56	0.352	0.280387	0.516	0.0172	0.0137007	5.22e-09	1.74e-10	1.386e-10	0.00693	0.000231	0.000184004	1.248e-11	4.16e-13	3.31367e-13
92552010	Fruit flavored drink, powdered, reconstituted, diet	Beverages, Nonalcoholic	Beverages, Nonalcoholic	Diet Beverages	Other	240	7.96554	0.000312	1.3e-06	1.03552e-05	0.0002976	1.24e-06	9.87727e-06	0.000468	1.95e-06	1.55328e-05	0.003144	1.31e-05	0.000104349	1.8072e-05	7.53e-08	5.99805e-07	9.36e-07	3.9e-09	3.10656e-08	2.0016e-06	8.34e-09	6.64326e-08	4.92e-07	2.05e-09	1.63294e-08	1.3128e-07	5.47e-10	4.35715e-09	0.003192	1.33e-05	0.000105942	0.002712	1.13e-05	9.00106e-05	2.712e-11	1.13e-13	9.00106e-13	3.264e-05	1.36e-07	1.08331e-06	3.36e-14	1.4e-16	1.11518e-15
		Emissions from Diet								0.167909			0.132421			0.129044			1.08341			0.0015618			0.000454523			0.00113767			0.000364938			6.8533e-05			0.929969			1.69007			7.67029e-09			0.0069869			1.90341e-11
TABLE 10: EMISSION CALCULATION FOR S4M3
		Characteristics of select foods						Impact Categories
WWEIA Foodcode	Food Description	USDA Main Group	Food subgroup	HENI category	Main ingredient contributing to environmental impacts	RACC (g/serving)	Qty of Diet	Global warming, shorter term (kg CO2 eq/serving)			Global warming, long term (kg CO2 eq/serving)			Land occupation, biodiversity (ha-yr arable/serving)			Fossil energy use (MJ/serving)			Mineral resources use (kg deprived/serving)			Freshwater acidification (kg SO2 eq/serving)			Terrestrial acidification (kg SO2 eq/serving)			Freshwater eutrophication (kg PO4---P- eq/serving)			Marine eutrophication (kg N eq/serving)			Freshwater ecotoxicity (CTUe/serving)			Ionizing radiation (Bq C-14 eq/serving)			Ozone Layer Depletion (kg CFC-11 eq/serving)			Water use (m3/serving)			Photochemical oxidant formation (DALYs/serving)
								HH, EQ			HH, EQ			EQ									EQ			EQ			EQ			EQ			EQ			HH, EQ			HH, EQ						HH
								Mean	Factor	Future Food	Mean	Factor	FF	Mean	Factor	FF	Mean	Factor	FF	Mean	Factor	FF	Mean	Factor	FF	Mean	Factor	FF	Mean	Factor	FF	Mean	Factor	FF	Mean	Factor	FF	Mean	Factor	FF	Mean	Factor	FF	Mean	Factor	FF	Mean	Factor	FF
11111000	Milk, whole	Milk and Dairy	Dairy	Milk	Dairy	244	7.91553	0.62952	0.00258	0.0204221	0.40504	0.00166	0.0131398	0.29768	0.00122	0.00965695	2.03496	0.00834	0.0660155	0.0027328	1.12e-05	8.86539e-05	0.00102724	4.21e-06	3.33244e-05	0.0026596	1.09e-05	8.62793e-05	0.00025376	1.04e-06	8.23215e-06	8.906e-05	3.65e-07	2.88917e-06	1.70312	0.00698	0.0552504	3.172	0.013	0.102902	1.88856e-08	7.74e-11	6.12662e-10	0.0207888	8.52e-05	0.000674403	3.6844e-11	1.51e-13	1.19525e-12
21500100	Ground beef, cooked	Protein Foods	Beef	Red meat	Beef	85	2.02638	3.1705	0.0373	0.0755838	2.227	0.0262	0.053091	2.227	0.0262	0.053091	15.13	0.178	0.360695	0.024225	0.000285	0.000577517	0.0081855	9.63e-05	0.00019514	0.02431	0.000286	0.000579543	0.002346	2.76e-05	5.5928e-05	0.0008585	1.01e-05	2.04664e-05	9.605	0.113	0.22898	25.5	0.3	0.607913	1.2665e-07	1.49e-09	3.0193e-09	7.106e-05	8.36e-07	1.69405e-06	2.635e-10	3.1e-12	6.28177e-12
24144210	Chicken, drumstick, fried, no coating, skin eaten, NS as to type of fat added in cooking	Protein Foods	Poultry	Poultry	Poultry	85	2.0897	0.44115	0.00519	0.0108455	0.41395	0.00487	0.0101768	0.73865	0.00869	0.0181595	3.9865	0.0469	0.0980069	0.005406	6.36e-05	0.000132905	0.0016235	1.91e-05	3.99132e-05	0.0048365	5.69e-05	0.000118904	0.00069615	8.19e-06	1.71146e-05	0.00016405	1.93e-06	4.03312e-06	2.2015	0.0259	0.0541232	4.352	0.0512	0.106993	3.74e-08	4.4e-10	9.19467e-10	0.02006	0.000236	0.000493169	5.4655e-11	6.43e-13	1.34368e-12
25221405	Pork sausage	Protein Foods	Processed meat	Cured Meats/Poultry	Processed meat	55	1.10817	0.3905	0.0071	0.00786804	0.2761	0.00502	0.00556303	0.2354	0.00428	0.00474299	4.3615	0.0793	0.0878782	0.0027445	4.99e-05	5.52979e-05	0.0009295	1.69e-05	1.87281e-05	0.0028435	5.17e-05	5.72926e-05	0.0002904	5.28e-06	5.85116e-06	0.0001848	3.36e-06	3.72347e-06	1.408	0.0256	0.0283693	22.605	0.411	0.45546	1.8205e-08	3.31e-10	3.66806e-10	0.0627	0.00114	0.00126332	3.1075e-11	5.65e-13	6.26118e-13
26137120	Salmon, baked or broiled, made with oil	Protein Foods	Seafood	Seafood	Seafood	85	3.95777	0.68255	0.00803	0.0317809	0.66555	0.00783	0.0309893	0.3995	0.0047	0.0186015	7.5905	0.0893	0.353428	0.005423	6.38e-05	0.000252505	0.0022015	2.59e-05	0.000102506	0.002856	3.36e-05	0.000132981	0.005474	6.44e-05	0.00025488	0.0006987	8.22e-06	3.25328e-05	2.8475	0.0335	0.132585	9.095	0.107	0.423481	3.1535e-08	3.71e-10	1.46833e-09	0.0034765	4.09e-05	0.000161873	1.496e-10	1.76e-12	6.96567e-12
31103010	Egg, whole, boiled or poached	Protein Foods	Eggs	Eggs	Animal-based (other)	50	1.18733	0.3385	0.00677	0.00803822	0.3325	0.00665	0.00789574	0.37	0.0074	0.00878623	1.775	0.0355	0.0421502	0.00765	0.000153	0.000181661	0.000755	1.51e-05	1.79287e-05	0.00177	3.54e-05	4.20314e-05	0.0002605	5.21e-06	6.18598e-06	5.9e-05	1.18e-06	1.40105e-06	2.425	0.0485	0.0575854	1.97	0.0394	0.0467808	1.9e-08	3.8e-10	4.51185e-10	0.01105	0.000221	0.0002624	3.315e-11	6.63e-13	7.87199e-13
41104020	Pinto, calico, or red Mexican beans, dry, cooked, fat not added in cooking	Protein Foods	Legumes	Legumes and soy products	Plant-based, other	90	1.89973	0.006975	7.75e-05	0.000147229	0.006795	7.55e-05	0.000143429	0.005319	5.91e-05	0.000112274	0.07803	0.000867	0.00164706	0.0003051	3.39e-06	6.44008e-06	3.753e-05	4.17e-07	7.92186e-07	5.76e-05	6.4e-07	1.21583e-06	8.289e-06	9.21e-08	1.74965e-07	2.304e-06	2.56e-08	4.8633e-08	0.03204	0.000356	0.000676303	0.1674	0.00186	0.00353349	3.402e-10	3.78e-12	7.18097e-12	0.005553	6.17e-05	0.000117213	2.781e-12	3.09e-14	5.87016e-14
42111200	Peanuts, dry roasted, salted	Protein Foods	Nuts and seeds	Nuts and seeds	Nuts and seeds	30	0.395777	0.0717	0.00239	0.000945906	0.0702	0.00234	0.000926117	0.1803	0.00601	0.00237862	0.318	0.0106	0.00419523	0.001044	3.48e-05	1.3773e-05	0.0002184	7.28e-06	2.88125e-06	0.000657	2.19e-05	8.66751e-06	7.59e-05	2.53e-06	1.00131e-06	2.121e-05	7.07e-07	2.79814e-07	0.2655	0.00885	0.00350262	0.1431	0.00477	0.00188785	3.27e-09	1.09e-10	4.31396e-11	0.00525	0.000175	6.92609e-05	7.23e-12	2.41e-13	9.53821e-14
56203010	Oatmeal, cooked, regular, fat not added in cooking	Grains	Grains	Cooked Cereals	Plant-based, other	234	4.35354	0.046566	0.000199	0.000866355	0.045396	0.000194	0.000844587	0.194688	0.000832	0.00362215	0.233064	0.000996	0.00433613	0.00075348	3.22e-06	1.40184e-05	0.00016848	7.2e-07	3.13455e-06	0.0004446	1.9e-06	8.27173e-06	0.000125892	5.38e-07	2.34221e-06	1.40166e-05	5.99e-08	2.60777e-07	0.37206	0.00159	0.00692213	0.13221	0.000565	0.00245975	2.808e-09	1.2e-11	5.22425e-11	0.0106236	4.54e-05	0.000197651	5.967e-12	2.55e-14	1.11015e-13
56205008	Rice, white, cooked, fat not added in cooking	Grains	Grains	Cooked Grains	Plant-based, other	140	3.16621	0.2044	0.00146	0.00462267	0.11886	0.000849	0.00268811	0.1337	0.000955	0.00302373	0.8162	0.00583	0.018459	0.003094	2.21e-05	6.99733e-05	0.0003094	2.21e-06	6.99733e-06	0.0004914	3.51e-06	1.11134e-05	0.0001582	1.13e-06	3.57782e-06	1.2278e-05	8.77e-08	2.77677e-07	2.198	0.0157	0.0497095	0.707	0.00505	0.0159894	7.028e-09	5.02e-11	1.58944e-10	0.04326	0.000309	0.00097836	1.0934e-11	7.81e-14	2.47281e-13
63107010	Banana, raw	Fruit	Fruits	Fruits	Plant-based, other	140	9.49864	0.02772	0.000198	0.00188073	0.02646	0.000189	0.00179524	0.011676	8.34e-05	0.000792186	0.2996	0.00214	0.0203271	0.0011298	8.07e-06	7.6654e-05	0.0002352	1.68e-06	1.59577e-05	0.0009954	7.11e-06	6.75353e-05	5.95e-05	4.25e-07	4.03692e-06	3.248e-05	2.32e-07	2.20368e-06	0.2268	0.00162	0.0153878	0.1932	0.00138	0.0131081	2.002e-09	1.43e-11	1.35831e-10	0.0336	0.00024	0.00227967	4.256e-12	3.04e-14	2.88759e-13
75113000	Lettuce, raw	Vegetables	Vegetables	Vegetables, excluding starchy	Plant-based, other	85	10.2902	0.030345	0.000357	0.0036736	0.029155	0.000343	0.00352954	0.016745	0.000197	0.00202717	0.26095	0.00307	0.0315909	0.00060605	7.13e-06	7.33691e-05	0.00011475	1.35e-06	1.38918e-05	0.00015215	1.79e-06	1.84194e-05	2.1335e-05	2.51e-07	2.58284e-06	4.4285e-06	5.21e-08	5.36119e-07	0.17	0.002	0.0205804	0.1343	0.00158	0.0162585	2.9325e-09	3.45e-11	3.55012e-10	0.005372	6.32e-05	0.00065034	6.4175e-12	7.55e-14	7.76909e-13
83106000	Italian dressing, made with vinegar and oil	Fats and Oils	Fats and Oils	Oils	Plant-based, other	30	0.791553	0.093	0.0031	0.00245381	0.0918	0.00306	0.00242215	0.1746	0.00582	0.00460684	0.504	0.0168	0.0132981	0.000987	3.29e-05	2.60421e-05	0.0002271	7.57e-06	5.99206e-06	0.000564	1.88e-05	1.48812e-05	9.24e-05	3.08e-06	2.43798e-06	1.977e-05	6.59e-07	5.21633e-07	10.56	0.352	0.278627	0.516	0.0172	0.0136147	5.22e-09	1.74e-10	1.3773e-10	0.00693	0.000231	0.000182849	1.248e-11	4.16e-13	3.29286e-13
92552010	Fruit flavored drink, powdered, reconstituted, diet	Beverages, Nonalcoholic	Beverages, Nonalcoholic	Diet Beverages	Other	240	7.91553	0.000312	1.3e-06	1.02902e-05	0.0002976	1.24e-06	9.81525e-06	0.000468	1.95e-06	1.54353e-05	0.003144	1.31e-05	0.000103693	1.8072e-05	7.53e-08	5.96039e-07	9.36e-07	3.9e-09	3.08705e-08	2.0016e-06	8.34e-09	6.60155e-08	4.92e-07	2.05e-09	1.62268e-08	1.3128e-07	5.47e-10	4.32979e-09	0.003192	1.33e-05	0.000105276	0.002712	1.13e-05	8.94454e-05	2.712e-11	1.13e-13	8.94454e-13	3.264e-05	1.36e-07	1.07651e-06	3.36e-14	1.4e-16	1.10817e-15
		Emissions from Diet								0.169139			0.133215			0.129617			1.10213			0.00156941			0.000457218			0.0011472			0.000364362			6.91787e-05			0.932405			1.81047			7.72872e-09			0.00733328			1.91081e-11
TABLE 11: EMISSION CALCULATION FOR S5M1M2M3
		Characteristics of select foods						Impact Categories
WWEIA Foodcode	Food Description	USDA Main Group	Food subgroup	HENI category	Main ingredient contributing to environmental impacts	RACC (g/serving)	Qty of Diet	Global warming, shorter term (kg CO2 eq/serving)			Global warming, long term (kg CO2 eq/serving)			Land occupation, biodiversity (ha-yr arable/serving)			Fossil energy use (MJ/serving)			Mineral resources use (kg deprived/serving)			Freshwater acidification (kg SO2 eq/serving)			Terrestrial acidification (kg SO2 eq/serving)			Freshwater eutrophication (kg PO4---P- eq/serving)			Marine eutrophication (kg N eq/serving)			Freshwater ecotoxicity (CTUe/serving)			Ionizing radiation (Bq C-14 eq/serving)			Ozone Layer Depletion (kg CFC-11 eq/serving)			Water use (m3/serving)			Photochemical oxidant formation (DALYs/serving)
								HH, EQ			HH, EQ			EQ									EQ			EQ			EQ			EQ			EQ			HH, EQ			HH, EQ						HH
								Mean	Factor	Future Food	Mean	Factor	FF	Mean	Factor	FF	Mean	Factor	FF	Mean	Factor	FF	Mean	Factor	FF	Mean	Factor	FF	Mean	Factor	FF	Mean	Factor	FF	Mean	Factor	FF	Mean	Factor	FF	Mean	Factor	FF	Mean	Factor	FF	Mean	Factor	FF
11111000	Milk, whole	Milk and Dairy	Dairy	Milk	Dairy	244	7.70212	0.62952	0.00258	0.0198715	0.40504	0.00166	0.0127855	0.29768	0.00122	0.00939658	2.03496	0.00834	0.0642357	0.0027328	1.12e-05	8.62637e-05	0.00102724	4.21e-06	3.24259e-05	0.0026596	1.09e-05	8.39531e-05	0.00025376	1.04e-06	8.0102e-06	8.906e-05	3.65e-07	2.81127e-06	1.70312	0.00698	0.0537608	3.172	0.013	0.100128	1.88856e-08	7.74e-11	5.96144e-10	0.0207888	8.52e-05	0.00065622	3.6844e-11	1.51e-13	1.16302e-12
21500100	Ground beef, cooked	Protein Foods	Beef	Red meat	Beef	85	1.54042	3.1705	0.0373	0.0574578	2.227	0.0262	0.0403591	2.227	0.0262	0.0403591	15.13	0.178	0.274195	0.024225	0.000285	0.000439021	0.0081855	9.63e-05	0.000148343	0.02431	0.000286	0.000440561	0.002346	2.76e-05	4.25157e-05	0.0008585	1.01e-05	1.55583e-05	9.605	0.113	0.174068	25.5	0.3	0.462127	1.2665e-07	1.49e-09	2.29523e-09	7.106e-05	8.36e-07	1.28779e-06	2.635e-10	3.1e-12	4.77531e-12
24144210	Chicken, drumstick, fried, no coating, skin eaten, NS as to type of fat added in cooking	Protein Foods	Poultry	Poultry	Poultry	85	1.92553	0.44115	0.00519	0.0099935	0.41395	0.00487	0.00937733	0.73865	0.00869	0.0167328	3.9865	0.0469	0.0903073	0.005406	6.36e-05	0.000122464	0.0016235	1.91e-05	3.67776e-05	0.0048365	5.69e-05	0.000109563	0.00069615	8.19e-06	1.57701e-05	0.00016405	1.93e-06	3.71627e-06	2.2015	0.0259	0.0498712	4.352	0.0512	0.0985871	3.74e-08	4.4e-10	8.47233e-10	0.02006	0.000236	0.000454425	5.4655e-11	6.43e-13	1.23812e-12
25221405	Pork sausage	Protein Foods	Processed meat	Cured Meats/Poultry	Processed meat	55	0.770212	0.3905	0.0071	0.0054685	0.2761	0.00502	0.00386646	0.2354	0.00428	0.00329651	4.3615	0.0793	0.0610778	0.0027445	4.99e-05	3.84336e-05	0.0009295	1.69e-05	1.30166e-05	0.0028435	5.17e-05	3.98199e-05	0.0002904	5.28e-06	4.06672e-06	0.0001848	3.36e-06	2.58791e-06	1.408	0.0256	0.0197174	22.605	0.411	0.316557	1.8205e-08	3.31e-10	2.5494e-10	0.0627	0.00114	0.000878041	3.1075e-11	5.65e-13	4.3517e-13
26137120	Salmon, baked or broiled, made with oil	Protein Foods	Seafood	Seafood	Seafood	85	3.85106	0.68255	0.00803	0.030924	0.66555	0.00783	0.0301538	0.3995	0.0047	0.0181	7.5905	0.0893	0.3439	0.005423	6.38e-05	0.000245698	0.0022015	2.59e-05	9.97424e-05	0.002856	3.36e-05	0.000129396	0.005474	6.44e-05	0.000248008	0.0006987	8.22e-06	3.16557e-05	2.8475	0.0335	0.12901	9.095	0.107	0.412063	3.1535e-08	3.71e-10	1.42874e-09	0.0034765	4.09e-05	0.000157508	1.496e-10	1.76e-12	6.77786e-12
31103010	Egg, whole, boiled or poached	Protein Foods	Eggs	Eggs	Animal-based (other)	50	1.15532	0.3385	0.00677	0.0078215	0.3325	0.00665	0.00768286	0.37	0.0074	0.00854935	1.775	0.0355	0.0410138	0.00765	0.000153	0.000176764	0.000755	1.51e-05	1.74453e-05	0.00177	3.54e-05	4.08982e-05	0.0002605	5.21e-06	6.0192e-06	5.9e-05	1.18e-06	1.36327e-06	2.425	0.0485	0.0560329	1.97	0.0394	0.0455195	1.9e-08	3.8e-10	4.39021e-10	0.01105	0.000221	0.000255325	3.315e-11	6.63e-13	7.65975e-13
41104020	Pinto, calico, or red Mexican beans, dry, cooked, fat not added in cooking	Protein Foods	Legumes	Legumes and soy products	Plant-based, other	90	3.08085	0.006975	7.75e-05	0.000238766	0.006795	7.55e-05	0.000232604	0.005319	5.91e-05	0.000182078	0.07803	0.000867	0.00267109	0.0003051	3.39e-06	1.04441e-05	3.753e-05	4.17e-07	1.28471e-06	5.76e-05	6.4e-07	1.97174e-06	8.289e-06	9.21e-08	2.83746e-07	2.304e-06	2.56e-08	7.88697e-08	0.03204	0.000356	0.00109678	0.1674	0.00186	0.00573037	3.402e-10	3.78e-12	1.16456e-11	0.005553	6.17e-05	0.000190088	2.781e-12	3.09e-14	9.51982e-14
42111200	Peanuts, dry roasted, salted	Protein Foods	Nuts and seeds	Nuts and seeds	Nuts and seeds	30	0.385106	0.0717	0.00239	0.000920403	0.0702	0.00234	0.000901148	0.1803	0.00601	0.00231449	0.318	0.0106	0.00408212	0.001044	3.48e-05	1.34017e-05	0.0002184	7.28e-06	2.80357e-06	0.000657	2.19e-05	8.43382e-06	7.59e-05	2.53e-06	9.74318e-07	2.121e-05	7.07e-07	2.7227e-07	0.2655	0.00885	0.00340819	0.1431	0.00477	0.00183695	3.27e-09	1.09e-10	4.19765e-11	0.00525	0.000175	6.73935e-05	7.23e-12	2.41e-13	9.28105e-14
56203010	Oatmeal, cooked, regular, fat not added in cooking	Grains	Grains	Cooked Cereals	Plant-based, other	234	4.23616	0.046566	0.000199	0.000842997	0.045396	0.000194	0.000821816	0.194688	0.000832	0.00352449	0.233064	0.000996	0.00421922	0.00075348	3.22e-06	1.36404e-05	0.00016848	7.2e-07	3.05004e-06	0.0004446	1.9e-06	8.04871e-06	0.000125892	5.38e-07	2.27906e-06	1.40166e-05	5.99e-08	2.53746e-07	0.37206	0.00159	0.0067355	0.13221	0.000565	0.00239343	2.808e-09	1.2e-11	5.0834e-11	0.0106236	4.54e-05	0.000192322	5.967e-12	2.55e-14	1.08022e-13
56205008	Rice, white, cooked, fat not added in cooking	Grains	Grains	Cooked Grains	Plant-based, other	140	3.08085	0.2044	0.00146	0.00449804	0.11886	0.000849	0.00261564	0.1337	0.000955	0.00294221	0.8162	0.00583	0.0179613	0.003094	2.21e-05	6.80867e-05	0.0003094	2.21e-06	6.80867e-06	0.0004914	3.51e-06	1.08138e-05	0.0001582	1.13e-06	3.48136e-06	1.2278e-05	8.77e-08	2.7019e-07	2.198	0.0157	0.0483693	0.707	0.00505	0.0155583	7.028e-09	5.02e-11	1.54659e-10	0.04326	0.000309	0.000951982	1.0934e-11	7.81e-14	2.40614e-13
63107010	Banana, raw	Fruit	Fruits	Fruits	Plant-based, other	140	9.24254	0.02772	0.000198	0.00183002	0.02646	0.000189	0.00174684	0.011676	8.34e-05	0.000770828	0.2996	0.00214	0.019779	0.0011298	8.07e-06	7.45873e-05	0.0002352	1.68e-06	1.55275e-05	0.0009954	7.11e-06	6.57145e-05	5.95e-05	4.25e-07	3.92808e-06	3.248e-05	2.32e-07	2.14427e-06	0.2268	0.00162	0.0149729	0.1932	0.00138	0.0127547	2.002e-09	1.43e-11	1.32168e-10	0.0336	0.00024	0.00221821	4.256e-12	3.04e-14	2.80973e-13
75113000	Lettuce, raw	Vegetables	Vegetables	Vegetables, excluding starchy	Plant-based, other	85	10.0128	0.030345	0.000357	0.00357455	0.029155	0.000343	0.00343437	0.016745	0.000197	0.00197251	0.26095	0.00307	0.0307391	0.00060605	7.13e-06	7.13909e-05	0.00011475	1.35e-06	1.35172e-05	0.00015215	1.79e-06	1.79228e-05	2.1335e-05	2.51e-07	2.5132e-06	4.4285e-06	5.21e-08	5.21664e-07	0.17	0.002	0.0200255	0.1343	0.00158	0.0158201	2.9325e-09	3.45e-11	3.4544e-10	0.005372	6.32e-05	0.000632806	6.4175e-12	7.55e-14	7.55963e-13
83106000	Italian dressing, made with vinegar and oil	Fats and Oils	Fats and Oils	Oils	Plant-based, other	30	0.770212	0.093	0.0031	0.00238766	0.0918	0.00306	0.00235685	0.1746	0.00582	0.00448263	0.504	0.0168	0.0129396	0.000987	3.29e-05	2.534e-05	0.0002271	7.57e-06	5.8305e-06	0.000564	1.88e-05	1.448e-05	9.24e-05	3.08e-06	2.37225e-06	1.977e-05	6.59e-07	5.07569e-07	10.56	0.352	0.271115	0.516	0.0172	0.0132476	5.22e-09	1.74e-10	1.34017e-10	0.00693	0.000231	0.000177919	1.248e-11	4.16e-13	3.20408e-13
92552010	Fruit flavored drink, powdered, reconstituted, diet	Beverages, Nonalcoholic	Beverages, Nonalcoholic	Diet Beverages	Other	240	7.70212	0.000312	1.3e-06	1.00128e-05	0.0002976	1.24e-06	9.55062e-06	0.000468	1.95e-06	1.50191e-05	0.003144	1.31e-05	0.000100898	1.8072e-05	7.53e-08	5.79969e-07	9.36e-07	3.9e-09	3.00383e-08	2.0016e-06	8.34e-09	6.42357e-08	4.92e-07	2.05e-09	1.57893e-08	1.3128e-07	5.47e-10	4.21306e-09	0.003192	1.33e-05	0.000102438	0.002712	1.13e-05	8.70339e-05	2.712e-11	1.13e-13	8.70339e-13	3.264e-05	1.36e-07	1.04749e-06	3.36e-14	1.4e-16	1.0783e-15
	Emissions from Diet									0.145839			0.116344			0.112639			0.967222			0.00138611			0.000396603			0.00097164			0.000340238			6.17455e-05			0.848286			1.50241			6.73292e-09			0.00683457			1.70505e-11
TABLE 12: EMISSION CALCULATION FOR S6M1
		Characteristics of select foods						Impact Categories
WWEIA Foodcode	Food Description	USDA Main Group	Food subgroup	HENI category	Main ingredient contributing to environmental impacts	RACC (g/serving)	Qty of Diet	Global warming, shorter term (kg CO2 eq/serving)			Global warming, long term (kg CO2 eq/serving)			Land occupation, biodiversity (ha-yr arable/serving)			Fossil energy use (MJ/serving)			Mineral resources use (kg deprived/serving)			Freshwater acidification (kg SO2 eq/serving)			Terrestrial acidification (kg SO2 eq/serving)			Freshwater eutrophication (kg PO4---P- eq/serving)			Marine eutrophication (kg N eq/serving)			Freshwater ecotoxicity (CTUe/serving)			Ionizing radiation (Bq C-14 eq/serving)			Ozone Layer Depletion (kg CFC-11 eq/serving)			Water use (m3/serving)			Photochemical oxidant formation (DALYs/serving)
								HH, EQ			HH, EQ			EQ									EQ			EQ			EQ			EQ			EQ			HH, EQ			HH, EQ						HH
								Mean	Factor	Future Food	Mean	Factor	FF	Mean	Factor	FF	Mean	Factor	FF	Mean	Factor	FF	Mean	Factor	FF	Mean	Factor	FF	Mean	Factor	FF	Mean	Factor	FF	Mean	Factor	FF	Mean	Factor	FF	Mean	Factor	FF	Mean	Factor	FF	Mean	Factor	FF
11111000	Milk, whole	Milk and Dairy	Dairy	Milk	Dairy	244	7.6946	0.62952	0.00258	0.0198521	0.40504	0.00166	0.012773	0.29768	0.00122	0.00938741	2.03496	0.00834	0.0641729	0.0027328	1.12e-05	8.61795e-05	0.00102724	4.21e-06	3.23943e-05	0.0026596	1.09e-05	8.38711e-05	0.00025376	1.04e-06	8.00238e-06	8.906e-05	3.65e-07	2.80853e-06	1.70312	0.00698	0.0537083	3.172	0.013	0.10003	1.88856e-08	7.74e-11	5.95562e-10	0.0207888	8.52e-05	0.00065558	3.6844e-11	1.51e-13	1.16188e-12
21500100	Ground beef, cooked	Protein Foods	Beef	Red meat	Beef	85	1.16958	3.1705	0.0373	0.0436253	2.227	0.0262	0.030643	2.227	0.0262	0.030643	15.13	0.178	0.208185	0.024225	0.000285	0.00033333	0.0081855	9.63e-05	0.00011263	0.02431	0.000286	0.0003345	0.002346	2.76e-05	3.22804e-05	0.0008585	1.01e-05	1.18127e-05	9.605	0.113	0.132162	25.5	0.3	0.350874	1.2665e-07	1.49e-09	1.74267e-09	7.106e-05	8.36e-07	9.77768e-07	2.635e-10	3.1e-12	3.62569e-12
24144210	Chicken, drumstick, fried, no coating, skin eaten, NS as to type of fat added in cooking	Protein Foods	Poultry	Poultry	Poultry	85	1.92365	0.44115	0.00519	0.00998375	0.41395	0.00487	0.00936818	0.73865	0.00869	0.0167165	3.9865	0.0469	0.0902192	0.005406	6.36e-05	0.000122344	0.0016235	1.91e-05	3.67417e-05	0.0048365	5.69e-05	0.000109456	0.00069615	8.19e-06	1.57547e-05	0.00016405	1.93e-06	3.71265e-06	2.2015	0.0259	0.0498226	4.352	0.0512	0.0984909	3.74e-08	4.4e-10	8.46406e-10	0.02006	0.000236	0.000453982	5.4655e-11	6.43e-13	1.23691e-12
25221405	Pork sausage	Protein Foods	Processed meat	Cured Meats/Poultry	Processed meat	55	0.76946	0.3905	0.0071	0.00546316	0.2761	0.00502	0.00386269	0.2354	0.00428	0.00329329	4.3615	0.0793	0.0610182	0.0027445	4.99e-05	3.8396e-05	0.0009295	1.69e-05	1.30039e-05	0.0028435	5.17e-05	3.97811e-05	0.0002904	5.28e-06	4.06275e-06	0.0001848	3.36e-06	2.58538e-06	1.408	0.0256	0.0196982	22.605	0.411	0.316248	1.8205e-08	3.31e-10	2.54691e-10	0.0627	0.00114	0.000877184	3.1075e-11	5.65e-13	4.34745e-13
26137120	Salmon, baked or broiled, made with oil	Protein Foods	Seafood	Seafood	Seafood	85	3.8473	0.68255	0.00803	0.0308938	0.66555	0.00783	0.0301243	0.3995	0.0047	0.0180823	7.5905	0.0893	0.343564	0.005423	6.38e-05	0.000245458	0.0022015	2.59e-05	9.9645e-05	0.002856	3.36e-05	0.000129269	0.005474	6.44e-05	0.000247766	0.0006987	8.22e-06	3.16248e-05	2.8475	0.0335	0.128885	9.095	0.107	0.411661	3.1535e-08	3.71e-10	1.42735e-09	0.0034765	4.09e-05	0.000157355	1.496e-10	1.76e-12	6.77125e-12
31103010	Egg, whole, boiled or poached	Protein Foods	Eggs	Eggs	Animal-based (other)	50	1.15419	0.3385	0.00677	0.00781387	0.3325	0.00665	0.00767537	0.37	0.0074	0.00854101	1.775	0.0355	0.0409738	0.00765	0.000153	0.000176591	0.000755	1.51e-05	1.74283e-05	0.00177	3.54e-05	4.08583e-05	0.0002605	5.21e-06	6.01333e-06	5.9e-05	1.18e-06	1.36194e-06	2.425	0.0485	0.0559782	1.97	0.0394	0.0454751	1.9e-08	3.8e-10	4.38592e-10	0.01105	0.000221	0.000255076	3.315e-11	6.63e-13	7.65228e-13
41104020	Pinto, calico, or red Mexican beans, dry, cooked, fat not added in cooking	Protein Foods	Legumes	Legumes and soy products	Plant-based, other	90	3.44718	0.006975	7.75e-05	0.000267156	0.006795	7.55e-05	0.000260262	0.005319	5.91e-05	0.000203728	0.07803	0.000867	0.0029887	0.0003051	3.39e-06	1.16859e-05	3.753e-05	4.17e-07	1.43747e-06	5.76e-05	6.4e-07	2.20619e-06	8.289e-06	9.21e-08	3.17485e-07	2.304e-06	2.56e-08	8.82478e-08	0.03204	0.000356	0.0012272	0.1674	0.00186	0.00641175	3.402e-10	3.78e-12	1.30303e-11	0.005553	6.17e-05	0.000212691	2.781e-12	3.09e-14	1.06518e-13
42111200	Peanuts, dry roasted, salted	Protein Foods	Nuts and seeds	Nuts and seeds	Nuts and seeds	30	0.38473	0.0717	0.00239	0.000919504	0.0702	0.00234	0.000900268	0.1803	0.00601	0.00231223	0.318	0.0106	0.00407814	0.001044	3.48e-05	1.33886e-05	0.0002184	7.28e-06	2.80083e-06	0.000657	2.19e-05	8.42558e-06	7.59e-05	2.53e-06	9.73367e-07	2.121e-05	7.07e-07	2.72004e-07	0.2655	0.00885	0.00340486	0.1431	0.00477	0.00183516	3.27e-09	1.09e-10	4.19356e-11	0.00525	0.000175	6.73277e-05	7.23e-12	2.41e-13	9.27199e-14
56203010	Oatmeal, cooked, regular, fat not added in cooking	Grains	Grains	Cooked Cereals	Plant-based, other	234	4.23203	0.046566	0.000199	0.000842174	0.045396	0.000194	0.000821014	0.194688	0.000832	0.00352105	0.233064	0.000996	0.0042151	0.00075348	3.22e-06	1.36271e-05	0.00016848	7.2e-07	3.04706e-06	0.0004446	1.9e-06	8.04085e-06	0.000125892	5.38e-07	2.27683e-06	1.40166e-05	5.99e-08	2.53499e-07	0.37206	0.00159	0.00672893	0.13221	0.000565	0.0023911	2.808e-09	1.2e-11	5.07843e-11	0.0106236	4.54e-05	0.000192134	5.967e-12	2.55e-14	1.07917e-13
56205008	Rice, white, cooked, fat not added in cooking	Grains	Grains	Cooked Grains	Plant-based, other	140	3.07784	0.2044	0.00146	0.00449364	0.11886	0.000849	0.00261309	0.1337	0.000955	0.00293934	0.8162	0.00583	0.0179438	0.003094	2.21e-05	6.80202e-05	0.0003094	2.21e-06	6.80202e-06	0.0004914	3.51e-06	1.08032e-05	0.0001582	1.13e-06	3.47796e-06	1.2278e-05	8.77e-08	2.69926e-07	2.198	0.0157	0.0483221	0.707	0.00505	0.0155431	7.028e-09	5.02e-11	1.54508e-10	0.04326	0.000309	0.000951052	1.0934e-11	7.81e-14	2.40379e-13
63107010	Banana, raw	Fruit	Fruits	Fruits	Plant-based, other	140	9.23352	0.02772	0.000198	0.00182824	0.02646	0.000189	0.00174513	0.011676	8.34e-05	0.000770075	0.2996	0.00214	0.0197597	0.0011298	8.07e-06	7.45145e-05	0.0002352	1.68e-06	1.55123e-05	0.0009954	7.11e-06	6.56503e-05	5.95e-05	4.25e-07	3.92424e-06	3.248e-05	2.32e-07	2.14218e-06	0.2268	0.00162	0.0149583	0.1932	0.00138	0.0127423	2.002e-09	1.43e-11	1.32039e-10	0.0336	0.00024	0.00221604	4.256e-12	3.04e-14	2.80699e-13
75113000	Lettuce, raw	Vegetables	Vegetables	Vegetables, excluding starchy	Plant-based, other	85	10.003	0.030345	0.000357	0.00357106	0.029155	0.000343	0.00343102	0.016745	0.000197	0.00197059	0.26095	0.00307	0.0307091	0.00060605	7.13e-06	7.13212e-05	0.00011475	1.35e-06	1.3504e-05	0.00015215	1.79e-06	1.79053e-05	2.1335e-05	2.51e-07	2.51075e-06	4.4285e-06	5.21e-08	5.21155e-07	0.17	0.002	0.020006	0.1343	0.00158	0.0158047	2.9325e-09	3.45e-11	3.45103e-10	0.005372	6.32e-05	0.000632188	6.4175e-12	7.55e-14	7.55225e-13
83106000	Italian dressing, made with vinegar and oil	Fats and Oils	Fats and Oils	Oils	Plant-based, other	30	0.76946	0.093	0.0031	0.00238533	0.0918	0.00306	0.00235455	0.1746	0.00582	0.00447826	0.504	0.0168	0.0129269	0.000987	3.29e-05	2.53152e-05	0.0002271	7.57e-06	5.82481e-06	0.000564	1.88e-05	1.44658e-05	9.24e-05	3.08e-06	2.36994e-06	1.977e-05	6.59e-07	5.07074e-07	10.56	0.352	0.27085	0.516	0.0172	0.0132347	5.22e-09	1.74e-10	1.33886e-10	0.00693	0.000231	0.000177745	1.248e-11	4.16e-13	3.20095e-13
92552010	Fruit flavored drink, powdered, reconstituted, diet	Beverages, Nonalcoholic	Beverages, Nonalcoholic	Diet Beverages	Other	240	7.6946	0.000312	1.3e-06	1.0003e-05	0.0002976	1.24e-06	9.54131e-06	0.000468	1.95e-06	1.50045e-05	0.003144	1.31e-05	0.000100799	1.8072e-05	7.53e-08	5.79404e-07	9.36e-07	3.9e-09	3.0009e-08	2.0016e-06	8.34e-09	6.4173e-08	4.92e-07	2.05e-09	1.57739e-08	1.3128e-07	5.47e-10	4.20895e-09	0.003192	1.33e-05	0.000102338	0.002712	1.13e-05	8.6949e-05	2.712e-11	1.13e-13	8.6949e-13	3.264e-05	1.36e-07	1.04647e-06	3.36e-14	1.4e-16	1.07724e-15
		Emissions from Diet								0.131949			0.106581			0.102874			0.900855			0.00128075			0.000360802			0.000865297			0.000329746			5.79643e-05			0.805854			1.39083			6.17743e-09			0.00685038			1.59003e-11
TABLE 13: EMISSION CALCULATION FOR S6M2
		Characteristics of select foods						Impact Categories
WWEIA Foodcode	Food Description	USDA Main Group	Food subgroup	HENI category	Main ingredient contributing to environmental impacts	RACC (g/serving)	Qty of Diet	Global warming, shorter term (kg CO2 eq/serving)			Global warming, long term (kg CO2 eq/serving)			Land occupation, biodiversity (ha-yr arable/serving)			Fossil energy use (MJ/serving)			Mineral resources use (kg deprived/serving)			Freshwater acidification (kg SO2 eq/serving)			Terrestrial acidification (kg SO2 eq/serving)			Freshwater eutrophication (kg PO4---P- eq/serving)			Marine eutrophication (kg N eq/serving)			Freshwater ecotoxicity (CTUe/serving)			Ionizing radiation (Bq C-14 eq/serving)			Ozone Layer Depletion (kg CFC-11 eq/serving)			Water use (m3/serving)			Photochemical oxidant formation (DALYs/serving)
								HH, EQ			HH, EQ			EQ									EQ			EQ			EQ			EQ			EQ			HH, EQ			HH, EQ						HH
								Mean	Factor	Future Food	Mean	Factor	FF	Mean	Factor	FF	Mean	Factor	FF	Mean	Factor	FF	Mean	Factor	FF	Mean	Factor	FF	Mean	Factor	FF	Mean	Factor	FF	Mean	Factor	FF	Mean	Factor	FF	Mean	Factor	FF	Mean	Factor	FF	Mean	Factor	FF
11111000	Milk, whole	Milk and Dairy	Dairy	Milk	Dairy	244	7.78204	0.62952	0.00258	0.0200777	0.40504	0.00166	0.0129182	0.29768	0.00122	0.00949408	2.03496	0.00834	0.0649022	0.0027328	1.12e-05	8.71588e-05	0.00102724	4.21e-06	3.27624e-05	0.0026596	1.09e-05	8.48242e-05	0.00025376	1.04e-06	8.09332e-06	8.906e-05	3.65e-07	2.84044e-06	1.70312	0.00698	0.0543186	3.172	0.013	0.101166	1.88856e-08	7.74e-11	6.0233e-10	0.0207888	8.52e-05	0.000663029	3.6844e-11	1.51e-13	1.17509e-12
21500100	Ground beef, cooked	Protein Foods	Beef	Red meat	Beef	85	1.18287	3.1705	0.0373	0.044121	2.227	0.0262	0.0309912	2.227	0.0262	0.0309912	15.13	0.178	0.210551	0.024225	0.000285	0.000337118	0.0081855	9.63e-05	0.00011391	0.02431	0.000286	0.000338301	0.002346	2.76e-05	3.26472e-05	0.0008585	1.01e-05	1.1947e-05	9.605	0.113	0.133664	25.5	0.3	0.354861	1.2665e-07	1.49e-09	1.76248e-09	7.106e-05	8.36e-07	9.88879e-07	2.635e-10	3.1e-12	3.6669e-12
24144210	Chicken, drumstick, fried, no coating, skin eaten, NS as to type of fat added in cooking	Protein Foods	Poultry	Poultry	Poultry	85	1.85212	0.44115	0.00519	0.00961252	0.41395	0.00487	0.00901984	0.73865	0.00869	0.0160949	3.9865	0.0469	0.0868646	0.005406	6.36e-05	0.000117795	0.0016235	1.91e-05	3.53755e-05	0.0048365	5.69e-05	0.000105386	0.00069615	8.19e-06	1.51689e-05	0.00016405	1.93e-06	3.5746e-06	2.2015	0.0259	0.04797	4.352	0.0512	0.0948287	3.74e-08	4.4e-10	8.14934e-10	0.02006	0.000236	0.000437101	5.4655e-11	6.43e-13	1.19091e-12
25221405	Pork sausage	Protein Foods	Processed meat	Cured Meats/Poultry	Processed meat	55	0.778204	0.3905	0.0071	0.00552525	0.2761	0.00502	0.00390658	0.2354	0.00428	0.00333071	4.3615	0.0793	0.0617115	0.0027445	4.99e-05	3.88324e-05	0.0009295	1.69e-05	1.31516e-05	0.0028435	5.17e-05	4.02331e-05	0.0002904	5.28e-06	4.10891e-06	0.0001848	3.36e-06	2.61476e-06	1.408	0.0256	0.019922	22.605	0.411	0.319842	1.8205e-08	3.31e-10	2.57585e-10	0.0627	0.00114	0.000887152	3.1075e-11	5.65e-13	4.39685e-13
26137120	Salmon, baked or broiled, made with oil	Protein Foods	Seafood	Seafood	Seafood	85	3.89102	0.68255	0.00803	0.0312449	0.66555	0.00783	0.0304667	0.3995	0.0047	0.0182878	7.5905	0.0893	0.347468	0.005423	6.38e-05	0.000248247	0.0022015	2.59e-05	0.000100777	0.002856	3.36e-05	0.000130738	0.005474	6.44e-05	0.000250582	0.0006987	8.22e-06	3.19842e-05	2.8475	0.0335	0.130349	9.095	0.107	0.416339	3.1535e-08	3.71e-10	1.44357e-09	0.0034765	4.09e-05	0.000159143	1.496e-10	1.76e-12	6.84819e-12
31103010	Egg, whole, boiled or poached	Protein Foods	Eggs	Eggs	Animal-based (other)	50	1.1673	0.3385	0.00677	0.00790265	0.3325	0.00665	0.00776257	0.37	0.0074	0.00863805	1.775	0.0355	0.0414393	0.00765	0.000153	0.000178598	0.000755	1.51e-05	1.76263e-05	0.00177	3.54e-05	4.13226e-05	0.0002605	5.21e-06	6.08166e-06	5.9e-05	1.18e-06	1.37742e-06	2.425	0.0485	0.0566143	1.97	0.0394	0.0459918	1.9e-08	3.8e-10	4.43576e-10	0.01105	0.000221	0.000257974	3.315e-11	6.63e-13	7.73923e-13
41104020	Pinto, calico, or red Mexican beans, dry, cooked, fat not added in cooking	Protein Foods	Legumes	Legumes and soy products	Plant-based, other	90	3.57974	0.006975	7.75e-05	0.00027743	0.006795	7.55e-05	0.00027027	0.005319	5.91e-05	0.000211562	0.07803	0.000867	0.00310363	0.0003051	3.39e-06	1.21353e-05	3.753e-05	4.17e-07	1.49275e-06	5.76e-05	6.4e-07	2.29103e-06	8.289e-06	9.21e-08	3.29694e-07	2.304e-06	2.56e-08	9.16413e-08	0.03204	0.000356	0.00127439	0.1674	0.00186	0.00665831	3.402e-10	3.78e-12	1.35314e-11	0.005553	6.17e-05	0.00022087	2.781e-12	3.09e-14	1.10614e-13
42111200	Peanuts, dry roasted, salted	Protein Foods	Nuts and seeds	Nuts and seeds	Nuts and seeds	30	0.389102	0.0717	0.00239	0.000929953	0.0702	0.00234	0.000910498	0.1803	0.00601	0.0023385	0.318	0.0106	0.00412448	0.001044	3.48e-05	1.35407e-05	0.0002184	7.28e-06	2.83266e-06	0.000657	2.19e-05	8.52133e-06	7.59e-05	2.53e-06	9.84428e-07	2.121e-05	7.07e-07	2.75095e-07	0.2655	0.00885	0.00344355	0.1431	0.00477	0.00185602	3.27e-09	1.09e-10	4.24121e-11	0.00525	0.000175	6.80928e-05	7.23e-12	2.41e-13	9.37735e-14
56203010	Oatmeal, cooked, regular, fat not added in cooking	Grains	Grains	Cooked Cereals	Plant-based, other	234	4.28012	0.046566	0.000199	0.000851744	0.045396	0.000194	0.000830343	0.194688	0.000832	0.00356106	0.233064	0.000996	0.004263	0.00075348	3.22e-06	1.3782e-05	0.00016848	7.2e-07	3.08169e-06	0.0004446	1.9e-06	8.13223e-06	0.000125892	5.38e-07	2.3027e-06	1.40166e-05	5.99e-08	2.56379e-07	0.37206	0.00159	0.00680539	0.13221	0.000565	0.00241827	2.808e-09	1.2e-11	5.13614e-11	0.0106236	4.54e-05	0.000194317	5.967e-12	2.55e-14	1.09143e-13
56205008	Rice, white, cooked, fat not added in cooking	Grains	Grains	Cooked Grains	Plant-based, other	140	3.11281	0.2044	0.00146	0.00454471	0.11886	0.000849	0.00264278	0.1337	0.000955	0.00297274	0.8162	0.00583	0.0181477	0.003094	2.21e-05	6.87932e-05	0.0003094	2.21e-06	6.87932e-06	0.0004914	3.51e-06	1.0926e-05	0.0001582	1.13e-06	3.51748e-06	1.2278e-05	8.77e-08	2.72994e-07	2.198	0.0157	0.0488712	0.707	0.00505	0.0157197	7.028e-09	5.02e-11	1.56263e-10	0.04326	0.000309	0.00096186	1.0934e-11	7.81e-14	2.43111e-13
63107010	Banana, raw	Fruit	Fruits	Fruits	Plant-based, other	140	9.33844	0.02772	0.000198	0.00184901	0.02646	0.000189	0.00176497	0.011676	8.34e-05	0.000778826	0.2996	0.00214	0.0199843	0.0011298	8.07e-06	7.53612e-05	0.0002352	1.68e-06	1.56886e-05	0.0009954	7.11e-06	6.63963e-05	5.95e-05	4.25e-07	3.96884e-06	3.248e-05	2.32e-07	2.16652e-06	0.2268	0.00162	0.0151283	0.1932	0.00138	0.0128871	2.002e-09	1.43e-11	1.3354e-10	0.0336	0.00024	0.00224123	4.256e-12	3.04e-14	2.83889e-13
75113000	Lettuce, raw	Vegetables	Vegetables	Vegetables, excluding starchy	Plant-based, other	85	10.1166	0.030345	0.000357	0.00361164	0.029155	0.000343	0.00347001	0.016745	0.000197	0.00199298	0.26095	0.00307	0.0310581	0.00060605	7.13e-06	7.21317e-05	0.00011475	1.35e-06	1.36575e-05	0.00015215	1.79e-06	1.81088e-05	2.1335e-05	2.51e-07	2.53928e-06	4.4285e-06	5.21e-08	5.27077e-07	0.17	0.002	0.0202333	0.1343	0.00158	0.0159843	2.9325e-09	3.45e-11	3.49024e-10	0.005372	6.32e-05	0.000639372	6.4175e-12	7.55e-14	7.63807e-13
83106000	Italian dressing, made with vinegar and oil	Fats and Oils	Fats and Oils	Oils	Plant-based, other	30	0.778204	0.093	0.0031	0.00241243	0.0918	0.00306	0.0023813	0.1746	0.00582	0.00452914	0.504	0.0168	0.0130738	0.000987	3.29e-05	2.56029e-05	0.0002271	7.57e-06	5.891e-06	0.000564	1.88e-05	1.46302e-05	9.24e-05	3.08e-06	2.39687e-06	1.977e-05	6.59e-07	5.12836e-07	10.56	0.352	0.273928	0.516	0.0172	0.0133851	5.22e-09	1.74e-10	1.35407e-10	0.00693	0.000231	0.000179765	1.248e-11	4.16e-13	3.23733e-13
92552010	Fruit flavored drink, powdered, reconstituted, diet	Beverages, Nonalcoholic	Beverages, Nonalcoholic	Diet Beverages	Other	240	7.78203	0.000312	1.3e-06	1.01166e-05	0.0002976	1.24e-06	9.64972e-06	0.000468	1.95e-06	1.5175e-05	0.003144	1.31e-05	0.000101945	1.8072e-05	7.53e-08	5.85987e-07	9.36e-07	3.9e-09	3.03499e-08	2.0016e-06	8.34e-09	6.49021e-08	4.92e-07	2.05e-09	1.59532e-08	1.3128e-07	5.47e-10	4.25677e-09	0.003192	1.33e-05	0.000103501	0.002712	1.13e-05	8.79369e-05	2.712e-11	1.13e-13	8.79369e-13	3.264e-05	1.36e-07	1.05836e-06	3.36e-14	1.4e-16	1.08948e-15
			Emissions from Diet							0.132971			0.107345			0.103237			0.906793			0.00128968			0.000363157			0.000869875			0.000332737			5.84452e-05			0.812625			1.40203			6.20689e-09			0.00691195			1.60239e-11
TABLE 14: EMISSION CALCULATION FOR S6M3
		Characteristics of select foods						Impact Categories
WWEIA Foodcode	Food Description	USDA Main Group	Food subgroup	HENI category	Main ingredient contributing to environmental impacts	RACC (g/serving)	Qty of Diet	Global warming, shorter term (kg CO2 eq/serving)			Global warming, long term (kg CO2 eq/serving)			Land occupation, biodiversity (ha-yr arable/serving)			Fossil energy use (MJ/serving)			Mineral resources use (kg deprived/serving)			Freshwater acidification (kg SO2 eq/serving)			Terrestrial acidification (kg SO2 eq/serving)			Freshwater eutrophication (kg PO4---P- eq/serving)			Marine eutrophication (kg N eq/serving)			Freshwater ecotoxicity (CTUe/serving)			Ionizing radiation (Bq C-14 eq/serving)			Ozone Layer Depletion (kg CFC-11 eq/serving)			Water use (m3/serving)			Photochemical oxidant formation (DALYs/serving)
								HH, EQ			HH, EQ			EQ									EQ			EQ			EQ			EQ			EQ			HH, EQ			HH, EQ						HH
								Mean	Factor	Future Food	Mean	Factor	FF	Mean	Factor	FF	Mean	Factor	FF	Mean	Factor	FF	Mean	Factor	FF	Mean	Factor	FF	Mean	Factor	FF	Mean	Factor	FF	Mean	Factor	FF	Mean	Factor	FF	Mean	Factor	FF	Mean	Factor	FF	Mean	Factor	FF
11111000	Milk, whole	Milk and Dairy	Dairy	Milk	Dairy	244	7.81687	0.62952	0.00258	0.0201675	0.40504	0.00166	0.012976	0.29768	0.00122	0.00953658	2.03496	0.00834	0.0651927	0.0027328	1.12e-05	8.75489e-05	0.00102724	4.21e-06	3.2909e-05	0.0026596	1.09e-05	8.52039e-05	0.00025376	1.04e-06	8.12954e-06	8.906e-05	3.65e-07	2.85316e-06	1.70312	0.00698	0.0545618	3.172	0.013	0.101619	1.88856e-08	7.74e-11	6.05026e-10	0.0207888	8.52e-05	0.000665997	3.6844e-11	1.51e-13	1.18035e-12
21500100	Ground beef, cooked	Protein Foods	Beef	Red meat	Beef	85	1.18816	3.1705	0.0373	0.0443185	2.227	0.0262	0.0311299	2.227	0.0262	0.0311299	15.13	0.178	0.211493	0.024225	0.000285	0.000338627	0.0081855	9.63e-05	0.00011442	0.02431	0.000286	0.000339815	0.002346	2.76e-05	3.27933e-05	0.0008585	1.01e-05	1.20005e-05	9.605	0.113	0.134263	25.5	0.3	0.356449	1.2665e-07	1.49e-09	1.77036e-09	7.106e-05	8.36e-07	9.93305e-07	2.635e-10	3.1e-12	3.68331e-12
24144210	Chicken, drumstick, fried, no coating, skin eaten, NS as to type of fat added in cooking	Protein Foods	Poultry	Poultry	Poultry	85	1.86042	0.44115	0.00519	0.00965556	0.41395	0.00487	0.00906022	0.73865	0.00869	0.016167	3.9865	0.0469	0.0872535	0.005406	6.36e-05	0.000118322	0.0016235	1.91e-05	3.55339e-05	0.0048365	5.69e-05	0.000105858	0.00069615	8.19e-06	1.52368e-05	0.00016405	1.93e-06	3.5906e-06	2.2015	0.0259	0.0481848	4.352	0.0512	0.0952533	3.74e-08	4.4e-10	8.18583e-10	0.02006	0.000236	0.000439058	5.4655e-11	6.43e-13	1.19625e-12
25221405	Pork sausage	Protein Foods	Processed meat	Cured Meats/Poultry	Processed meat	55	0.62535	0.3905	0.0071	0.00443998	0.2761	0.00502	0.00313926	0.2354	0.00428	0.0026765	4.3615	0.0793	0.0495902	0.0027445	4.99e-05	3.12049e-05	0.0009295	1.69e-05	1.05684e-05	0.0028435	5.17e-05	3.23306e-05	0.0002904	5.28e-06	3.30185e-06	0.0001848	3.36e-06	2.10117e-06	1.408	0.0256	0.016009	22.605	0.411	0.257019	1.8205e-08	3.31e-10	2.06991e-10	0.0627	0.00114	0.000712899	3.1075e-11	5.65e-13	3.53323e-13
26137120	Salmon, baked or broiled, made with oil	Protein Foods	Seafood	Seafood	Seafood	85	3.90844	0.68255	0.00803	0.0313847	0.66555	0.00783	0.030603	0.3995	0.0047	0.0183696	7.5905	0.0893	0.349023	0.005423	6.38e-05	0.000249358	0.0022015	2.59e-05	0.000101228	0.002856	3.36e-05	0.000131323	0.005474	6.44e-05	0.000251703	0.0006987	8.22e-06	3.21273e-05	2.8475	0.0335	0.130933	9.095	0.107	0.418203	3.1535e-08	3.71e-10	1.45003e-09	0.0034765	4.09e-05	0.000159855	1.496e-10	1.76e-12	6.87885e-12
31103010	Egg, whole, boiled or poached	Protein Foods	Eggs	Eggs	Animal-based (other)	50	1.17253	0.3385	0.00677	0.00793803	0.3325	0.00665	0.00779733	0.37	0.0074	0.00867673	1.775	0.0355	0.0416248	0.00765	0.000153	0.000179397	0.000755	1.51e-05	1.77052e-05	0.00177	3.54e-05	4.15076e-05	0.0002605	5.21e-06	6.10889e-06	5.9e-05	1.18e-06	1.38359e-06	2.425	0.0485	0.0568677	1.97	0.0394	0.0461977	1.9e-08	3.8e-10	4.45562e-10	0.01105	0.000221	0.000259129	3.315e-11	6.63e-13	7.77388e-13
41104020	Pinto, calico, or red Mexican beans, dry, cooked, fat not added in cooking	Protein Foods	Legumes	Legumes and soy products	Plant-based, other	90	3.7521	0.006975	7.75e-05	0.000290788	0.006795	7.55e-05	0.000283283	0.005319	5.91e-05	0.000221749	0.07803	0.000867	0.00325307	0.0003051	3.39e-06	1.27196e-05	3.753e-05	4.17e-07	1.56462e-06	5.76e-05	6.4e-07	2.40134e-06	8.289e-06	9.21e-08	3.45568e-07	2.304e-06	2.56e-08	9.60537e-08	0.03204	0.000356	0.00133575	0.1674	0.00186	0.0069789	3.402e-10	3.78e-12	1.41829e-11	0.005553	6.17e-05	0.000231504	2.781e-12	3.09e-14	1.1594e-13
42111200	Peanuts, dry roasted, salted	Protein Foods	Nuts and seeds	Nuts and seeds	Nuts and seeds	30	0.390844	0.0717	0.00239	0.000934116	0.0702	0.00234	0.000914574	0.1803	0.00601	0.00234897	0.318	0.0106	0.00414294	0.001044	3.48e-05	1.36014e-05	0.0002184	7.28e-06	2.84534e-06	0.000657	2.19e-05	8.55947e-06	7.59e-05	2.53e-06	9.88834e-07	2.121e-05	7.07e-07	2.76326e-07	0.2655	0.00885	0.00345897	0.1431	0.00477	0.00186432	3.27e-09	1.09e-10	4.26019e-11	0.00525	0.000175	6.83976e-05	7.23e-12	2.41e-13	9.41933e-14
56203010	Oatmeal, cooked, regular, fat not added in cooking	Grains	Grains	Cooked Cereals	Plant-based, other	234	4.29928	0.046566	0.000199	0.000855556	0.045396	0.000194	0.00083406	0.194688	0.000832	0.003577	0.233064	0.000996	0.00428208	0.00075348	3.22e-06	1.38437e-05	0.00016848	7.2e-07	3.09548e-06	0.0004446	1.9e-06	8.16863e-06	0.000125892	5.38e-07	2.31301e-06	1.40166e-05	5.99e-08	2.57527e-07	0.37206	0.00159	0.00683585	0.13221	0.000565	0.00242909	2.808e-09	1.2e-11	5.15913e-11	0.0106236	4.54e-05	0.000195187	5.967e-12	2.55e-14	1.09632e-13
56205008	Rice, white, cooked, fat not added in cooking	Grains	Grains	Cooked Grains	Plant-based, other	140	3.12675	0.2044	0.00146	0.00456505	0.11886	0.000849	0.00265461	0.1337	0.000955	0.00298604	0.8162	0.00583	0.0182289	0.003094	2.21e-05	6.91011e-05	0.0003094	2.21e-06	6.91011e-06	0.0004914	3.51e-06	1.09749e-05	0.0001582	1.13e-06	3.53323e-06	1.2278e-05	8.77e-08	2.74216e-07	2.198	0.0157	0.0490899	0.707	0.00505	0.0157901	7.028e-09	5.02e-11	1.56963e-10	0.04326	0.000309	0.000966165	1.0934e-11	7.81e-14	2.44199e-13
63107010	Banana, raw	Fruit	Fruits	Fruits	Plant-based, other	140	9.38024	0.02772	0.000198	0.00185729	0.02646	0.000189	0.00177287	0.011676	8.34e-05	0.000782312	0.2996	0.00214	0.0200737	0.0011298	8.07e-06	7.56986e-05	0.0002352	1.68e-06	1.57588e-05	0.0009954	7.11e-06	6.66935e-05	5.95e-05	4.25e-07	3.9866e-06	3.248e-05	2.32e-07	2.17622e-06	0.2268	0.00162	0.015196	0.1932	0.00138	0.0129447	2.002e-09	1.43e-11	1.34137e-10	0.0336	0.00024	0.00225126	4.256e-12	3.04e-14	2.85159e-13
75113000	Lettuce, raw	Vegetables	Vegetables	Vegetables, excluding starchy	Plant-based, other	85	10.1619	0.030345	0.000357	0.00362781	0.029155	0.000343	0.00348554	0.016745	0.000197	0.0020019	0.26095	0.00307	0.0311971	0.00060605	7.13e-06	7.24546e-05	0.00011475	1.35e-06	1.37186e-05	0.00015215	1.79e-06	1.81899e-05	2.1335e-05	2.51e-07	2.55064e-06	4.4285e-06	5.21e-08	5.29437e-07	0.17	0.002	0.0203239	0.1343	0.00158	0.0160559	2.9325e-09	3.45e-11	3.50587e-10	0.005372	6.32e-05	0.000642234	6.4175e-12	7.55e-14	7.67226e-13
83106000	Italian dressing, made with vinegar and oil	Fats and Oils	Fats and Oils	Oils	Plant-based, other	30	0.781687	0.093	0.0031	0.00242323	0.0918	0.00306	0.00239196	0.1746	0.00582	0.00454942	0.504	0.0168	0.0131323	0.000987	3.29e-05	2.57175e-05	0.0002271	7.57e-06	5.91737e-06	0.000564	1.88e-05	1.46957e-05	9.24e-05	3.08e-06	2.4076e-06	1.977e-05	6.59e-07	5.15132e-07	10.56	0.352	0.275154	0.516	0.0172	0.013445	5.22e-09	1.74e-10	1.36014e-10	0.00693	0.000231	0.00018057	1.248e-11	4.16e-13	3.25182e-13
92552010	Fruit flavored drink, powdered, reconstituted, diet	Beverages, Nonalcoholic	Beverages, Nonalcoholic	Diet Beverages	Other	240	7.81687	0.000312	1.3e-06	1.01619e-05	0.0002976	1.24e-06	9.69292e-06	0.000468	1.95e-06	1.52429e-05	0.003144	1.31e-05	0.000102401	1.8072e-05	7.53e-08	5.88611e-07	9.36e-07	3.9e-09	3.04858e-08	2.0016e-06	8.34e-09	6.51927e-08	4.92e-07	2.05e-09	1.60246e-08	1.3128e-07	5.47e-10	4.27583e-09	0.003192	1.33e-05	0.000103964	0.002712	1.13e-05	8.83307e-05	2.712e-11	1.13e-13	8.83307e-13	3.264e-05	1.36e-07	1.06309e-06	3.36e-14	1.4e-16	1.09436e-15
				Emissions from Diet						0.132468			0.107052			0.103039			0.89859			0.00128818			0.000362206			0.000865787			0.000333415			5.81855e-05			0.812317			1.34434			6.18352e-09			0.00677431			1.60121e-11
TABLE 15: EMISSION CALCULATION FOR S7M1
		Characteristics of select foods						Impact Categories
WWEIA Foodcode	Food Description	USDA Main Group	Food subgroup	HENI category	Main ingredient contributing to environmental impacts	RACC (g/serving)	Qty of Diet	Global warming, shorter term (kg CO2 eq/serving)			Global warming, long term (kg CO2 eq/serving)			Land occupation, biodiversity (ha-yr arable/serving)			Fossil energy use (MJ/serving)			Mineral resources use (kg deprived/serving)			Freshwater acidification (kg SO2 eq/serving)			Terrestrial acidification (kg SO2 eq/serving)			Freshwater eutrophication (kg PO4---P- eq/serving)			Marine eutrophication (kg N eq/serving)			Freshwater ecotoxicity (CTUe/serving)			Ionizing radiation (Bq C-14 eq/serving)			Ozone Layer Depletion (kg CFC-11 eq/serving)			Water use (m3/serving)			Photochemical oxidant formation (DALYs/serving)
								HH, EQ			HH, EQ			EQ									EQ			EQ			EQ			EQ			EQ			HH, EQ			HH, EQ						HH
								Mean	Factor	Future Food	Mean	Factor	FF	Mean	Factor	FF	Mean	Factor	FF	Mean	Factor	FF	Mean	Factor	FF	Mean	Factor	FF	Mean	Factor	FF	Mean	Factor	FF	Mean	Factor	FF	Mean	Factor	FF	Mean	Factor	FF	Mean	Factor	FF	Mean	Factor	FF
11111000	Milk, whole	Milk and Dairy	Dairy	Milk	Dairy	244	8.32192	0.62952	0.00258	0.0214705	0.40504	0.00166	0.0138144	0.29768	0.00122	0.0101527	2.03496	0.00834	0.0694048	0.0027328	1.12e-05	9.32055e-05	0.00102724	4.21e-06	3.50353e-05	0.0026596	1.09e-05	9.07089e-05	0.00025376	1.04e-06	8.65479e-06	8.906e-05	3.65e-07	3.0375e-06	1.70312	0.00698	0.058087	3.172	0.013	0.108185	1.88856e-08	7.74e-11	6.44116e-10	0.0207888	8.52e-05	0.000709027	3.6844e-11	1.51e-13	1.25661e-12
21500100	Ground beef, cooked	Protein Foods	Beef	Red meat	Beef	85	0.865479	3.1705	0.0373	0.0322824	2.227	0.0262	0.0226756	2.227	0.0262	0.0226756	15.13	0.178	0.154055	0.024225	0.000285	0.000246662	0.0081855	9.63e-05	8.33456e-05	0.02431	0.000286	0.000247527	0.002346	2.76e-05	2.38872e-05	0.0008585	1.01e-05	8.74134e-06	9.605	0.113	0.0977992	25.5	0.3	0.259644	1.2665e-07	1.49e-09	1.28956e-09	7.106e-05	8.36e-07	7.23541e-07	2.635e-10	3.1e-12	2.68299e-12
24144210	Chicken, drumstick, fried, no coating, skin eaten, NS as to type of fat added in cooking	Protein Foods	Poultry	Poultry	Poultry	85	2.08048	0.44115	0.00519	0.0107977	0.41395	0.00487	0.0101319	0.73865	0.00869	0.0180793	3.9865	0.0469	0.0975743	0.005406	6.36e-05	0.000132318	0.0016235	1.91e-05	3.97371e-05	0.0048365	5.69e-05	0.000118379	0.00069615	8.19e-06	1.70391e-05	0.00016405	1.93e-06	4.01532e-06	2.2015	0.0259	0.0538843	4.352	0.0512	0.10652	3.74e-08	4.4e-10	9.1541e-10	0.02006	0.000236	0.000490992	5.4655e-11	6.43e-13	1.33775e-12
25221405	Pork sausage	Protein Foods	Processed meat	Cured Meats/Poultry	Processed meat	55	0.832192	0.3905	0.0071	0.00590856	0.2761	0.00502	0.0041776	0.2354	0.00428	0.00356178	4.3615	0.0793	0.0659928	0.0027445	4.99e-05	4.15264e-05	0.0009295	1.69e-05	1.4064e-05	0.0028435	5.17e-05	4.30243e-05	0.0002904	5.28e-06	4.39397e-06	0.0001848	3.36e-06	2.79616e-06	1.408	0.0256	0.0213041	22.605	0.411	0.342031	1.8205e-08	3.31e-10	2.75455e-10	0.0627	0.00114	0.000948698	3.1075e-11	5.65e-13	4.70188e-13
26137120	Salmon, baked or broiled, made with oil	Protein Foods	Seafood	Seafood	Seafood	85	4.16096	0.68255	0.00803	0.0334125	0.66555	0.00783	0.0325803	0.3995	0.0047	0.0195565	7.5905	0.0893	0.371574	0.005423	6.38e-05	0.000265469	0.0022015	2.59e-05	0.000107769	0.002856	3.36e-05	0.000139808	0.005474	6.44e-05	0.000267966	0.0006987	8.22e-06	3.42031e-05	2.8475	0.0335	0.139392	9.095	0.107	0.445222	3.1535e-08	3.71e-10	1.54372e-09	0.0034765	4.09e-05	0.000170183	1.496e-10	1.76e-12	7.32329e-12
31103010	Egg, whole, boiled or poached	Protein Foods	Eggs	Eggs	Animal-based (other)	50	1.24829	0.3385	0.00677	0.00845089	0.3325	0.00665	0.0083011	0.37	0.0074	0.00923731	1.775	0.0355	0.0443141	0.00765	0.000153	0.000190988	0.000755	1.51e-05	1.88491e-05	0.00177	3.54e-05	4.41893e-05	0.0002605	5.21e-06	6.50357e-06	5.9e-05	1.18e-06	1.47298e-06	2.425	0.0485	0.0605419	1.97	0.0394	0.0491825	1.9e-08	3.8e-10	4.74349e-10	0.01105	0.000221	0.000275871	3.315e-11	6.63e-13	8.27613e-13
41104020	Pinto, calico, or red Mexican beans, dry, cooked, fat not added in cooking	Protein Foods	Legumes	Legumes and soy products	Plant-based, other	90	4.12767	0.006975	7.75e-05	0.000319894	0.006795	7.55e-05	0.000311639	0.005319	5.91e-05	0.000243945	0.07803	0.000867	0.00357869	0.0003051	3.39e-06	1.39928e-05	3.753e-05	4.17e-07	1.72124e-06	5.76e-05	6.4e-07	2.64171e-06	8.289e-06	9.21e-08	3.80158e-07	2.304e-06	2.56e-08	1.05668e-07	0.03204	0.000356	0.00146945	0.1674	0.00186	0.00767747	3.402e-10	3.78e-12	1.56026e-11	0.005553	6.17e-05	0.000254677	2.781e-12	3.09e-14	1.27545e-13
42111200	Peanuts, dry roasted, salted	Protein Foods	Nuts and seeds	Nuts and seeds	Nuts and seeds	30	0.416096	0.0717	0.00239	0.000994469	0.0702	0.00234	0.000973664	0.1803	0.00601	0.00250074	0.318	0.0106	0.00441062	0.001044	3.48e-05	1.44801e-05	0.0002184	7.28e-06	3.02918e-06	0.000657	2.19e-05	9.1125e-06	7.59e-05	2.53e-06	1.05272e-06	2.121e-05	7.07e-07	2.9418e-07	0.2655	0.00885	0.00368245	0.1431	0.00477	0.00198478	3.27e-09	1.09e-10	4.53544e-11	0.00525	0.000175	7.28168e-05	7.23e-12	2.41e-13	1.00279e-13
56203010	Oatmeal, cooked, regular, fat not added in cooking	Grains	Grains	Cooked Cereals	Plant-based, other	234	4.57705	0.046566	0.000199	0.000910834	0.045396	0.000194	0.000887948	0.194688	0.000832	0.00380811	0.233064	0.000996	0.00455875	0.00075348	3.22e-06	1.47381e-05	0.00016848	7.2e-07	3.29548e-06	0.0004446	1.9e-06	8.6964e-06	0.000125892	5.38e-07	2.46245e-06	1.40166e-05	5.99e-08	2.74166e-07	0.37206	0.00159	0.00727752	0.13221	0.000565	0.00258604	2.808e-09	1.2e-11	5.49246e-11	0.0106236	4.54e-05	0.000207798	5.967e-12	2.55e-14	1.16715e-13
56205008	Rice, white, cooked, fat not added in cooking	Grains	Grains	Cooked Grains	Plant-based, other	140	3.32877	0.2044	0.00146	0.00486	0.11886	0.000849	0.00282612	0.1337	0.000955	0.00317897	0.8162	0.00583	0.0194067	0.003094	2.21e-05	7.35657e-05	0.0003094	2.21e-06	7.35657e-06	0.0004914	3.51e-06	1.1684e-05	0.0001582	1.13e-06	3.76151e-06	1.2278e-05	8.77e-08	2.91933e-07	2.198	0.0157	0.0522616	0.707	0.00505	0.0168103	7.028e-09	5.02e-11	1.67104e-10	0.04326	0.000309	0.00102859	1.0934e-11	7.81e-14	2.59977e-13
63107010	Banana, raw	Fruit	Fruits	Fruits	Plant-based, other	140	9.9863	0.02772	0.000198	0.00197729	0.02646	0.000189	0.00188741	0.011676	8.34e-05	0.000832857	0.2996	0.00214	0.0213707	0.0011298	8.07e-06	8.05894e-05	0.0002352	1.68e-06	1.6777e-05	0.0009954	7.11e-06	7.10026e-05	5.95e-05	4.25e-07	4.24418e-06	3.248e-05	2.32e-07	2.31682e-06	0.2268	0.00162	0.0161778	0.1932	0.00138	0.0137811	2.002e-09	1.43e-11	1.42804e-10	0.0336	0.00024	0.00239671	4.256e-12	3.04e-14	3.03583e-13
75113000	Lettuce, raw	Vegetables	Vegetables	Vegetables, excluding starchy	Plant-based, other	85	10.8185	0.030345	0.000357	0.0038622	0.029155	0.000343	0.00371074	0.016745	0.000197	0.00213124	0.26095	0.00307	0.0332128	0.00060605	7.13e-06	7.71358e-05	0.00011475	1.35e-06	1.4605e-05	0.00015215	1.79e-06	1.93651e-05	2.1335e-05	2.51e-07	2.71544e-06	4.4285e-06	5.21e-08	5.63643e-07	0.17	0.002	0.021637	0.1343	0.00158	0.0170932	2.9325e-09	3.45e-11	3.73238e-10	0.005372	6.32e-05	0.000683729	6.4175e-12	7.55e-14	8.16796e-13
83106000	Italian dressing, made with vinegar and oil	Fats and Oils	Fats and Oils	Oils	Plant-based, other	30	0.832192	0.093	0.0031	0.00257979	0.0918	0.00306	0.00254651	0.1746	0.00582	0.00484335	0.504	0.0168	0.0139808	0.000987	3.29e-05	2.73791e-05	0.0002271	7.57e-06	6.29969e-06	0.000564	1.88e-05	1.56452e-05	9.24e-05	3.08e-06	2.56315e-06	1.977e-05	6.59e-07	5.48414e-07	10.56	0.352	0.292931	0.516	0.0172	0.0143137	5.22e-09	1.74e-10	1.44801e-10	0.00693	0.000231	0.000192236	1.248e-11	4.16e-13	3.46192e-13
92552010	Fruit flavored drink, powdered, reconstituted, diet	Beverages, Nonalcoholic	Beverages, Nonalcoholic	Diet Beverages	Other	240	8.3219	0.000312	1.3e-06	1.08185e-05	0.0002976	1.24e-06	1.03192e-05	0.000468	1.95e-06	1.62277e-05	0.003144	1.31e-05	0.000109017	1.8072e-05	7.53e-08	6.26639e-07	9.36e-07	3.9e-09	3.24554e-08	2.0016e-06	8.34e-09	6.94047e-08	4.92e-07	2.05e-09	1.70599e-08	1.3128e-07	5.47e-10	4.55208e-09	0.003192	1.33e-05	0.000110681	0.002712	1.13e-05	9.40375e-05	2.712e-11	1.13e-13	9.40375e-13	3.264e-05	1.36e-07	1.13178e-06	3.36e-14	1.4e-16	1.16507e-15
			Emissions from Diet							0.127838			0.104835			0.100819			0.903543			0.00127268			0.000351917			0.000821854			0.000345641			5.86657e-05			0.826556			1.38513			6.08738e-09			0.00743319			1.59707e-11
TABLE 16: EMISSION CALCULATION FOR S7M2
		Characteristics of select foods						Impact Categories
WWEIA Foodcode	Food Description	USDA Main Group	Food subgroup	HENI category	Main ingredient contributing to environmental impacts	RACC (g/serving)	Qty of Diet	Global warming, shorter term (kg CO2 eq/serving)			Global warming, long term (kg CO2 eq/serving)			Land occupation, biodiversity (ha-yr arable/serving)			Fossil energy use (MJ/serving)			Mineral resources use (kg deprived/serving)			Freshwater acidification (kg SO2 eq/serving)			Terrestrial acidification (kg SO2 eq/serving)			Freshwater eutrophication (kg PO4---P- eq/serving)			Marine eutrophication (kg N eq/serving)			Freshwater ecotoxicity (CTUe/serving)			Ionizing radiation (Bq C-14 eq/serving)			Ozone Layer Depletion (kg CFC-11 eq/serving)			Water use (m3/serving)			Photochemical oxidant formation (DALYs/serving)
								HH, EQ			HH, EQ			EQ									EQ			EQ			EQ			EQ			EQ			HH, EQ			HH, EQ						HH
								Mean	Factor	Future Food	Mean	Factor	FF	Mean	Factor	FF	Mean	Factor	FF	Mean	Factor	FF	Mean	Factor	FF	Mean	Factor	FF	Mean	Factor	FF	Mean	Factor	FF	Mean	Factor	FF	Mean	Factor	FF	Mean	Factor	FF	Mean	Factor	FF	Mean	Factor	FF
11111000	Milk, whole	Milk and Dairy	Dairy	Milk	Dairy	244	7.77457	0.62952	0.00258	0.0200584	0.40504	0.00166	0.0129058	0.29768	0.00122	0.00948498	2.03496	0.00834	0.0648399	0.0027328	1.12e-05	8.70752e-05	0.00102724	4.21e-06	3.27309e-05	0.0026596	1.09e-05	8.47428e-05	0.00025376	1.04e-06	8.08556e-06	8.906e-05	3.65e-07	2.83772e-06	1.70312	0.00698	0.0542665	3.172	0.013	0.101069	1.88856e-08	7.74e-11	6.01752e-10	0.0207888	8.52e-05	0.000662394	3.6844e-11	1.51e-13	1.17396e-12
21500100	Ground beef, cooked	Protein Foods	Beef	Red meat	Beef	85	0.808556	3.1705	0.0373	0.0301591	2.227	0.0262	0.0211842	2.227	0.0262	0.0211842	15.13	0.178	0.143923	0.024225	0.000285	0.000230438	0.0081855	9.63e-05	7.78639e-05	0.02431	0.000286	0.000231247	0.002346	2.76e-05	2.23161e-05	0.0008585	1.01e-05	8.16641e-06	9.605	0.113	0.0913668	25.5	0.3	0.242567	1.2665e-07	1.49e-09	1.20475e-09	7.106e-05	8.36e-07	6.75952e-07	2.635e-10	3.1e-12	2.50652e-12
24144210	Chicken, drumstick, fried, no coating, skin eaten, NS as to type of fat added in cooking	Protein Foods	Poultry	Poultry	Poultry	85	1.57046	0.44115	0.00519	0.00815071	0.41395	0.00487	0.00764816	0.73865	0.00869	0.0136473	3.9865	0.0469	0.0736548	0.005406	6.36e-05	9.98815e-05	0.0016235	1.91e-05	2.99959e-05	0.0048365	5.69e-05	8.93594e-05	0.00069615	8.19e-06	1.28621e-05	0.00016405	1.93e-06	3.031e-06	2.2015	0.0259	0.040675	4.352	0.0512	0.0804078	3.74e-08	4.4e-10	6.91004e-10	0.02006	0.000236	0.00037063	5.4655e-11	6.43e-13	1.00981e-12
25221405	Pork sausage	Protein Foods	Processed meat	Cured Meats/Poultry	Processed meat	55	0.777457	0.3905	0.0071	0.00551995	0.2761	0.00502	0.00390284	0.2354	0.00428	0.00332752	4.3615	0.0793	0.0616524	0.0027445	4.99e-05	3.87951e-05	0.0009295	1.69e-05	1.3139e-05	0.0028435	5.17e-05	4.01945e-05	0.0002904	5.28e-06	4.10497e-06	0.0001848	3.36e-06	2.61226e-06	1.408	0.0256	0.0199029	22.605	0.411	0.319535	1.8205e-08	3.31e-10	2.57338e-10	0.0627	0.00114	0.000886301	3.1075e-11	5.65e-13	4.39263e-13
26137120	Salmon, baked or broiled, made with oil	Protein Foods	Seafood	Seafood	Seafood	85	3.88729	0.68255	0.00803	0.0312149	0.66555	0.00783	0.0304375	0.3995	0.0047	0.0182702	7.5905	0.0893	0.347135	0.005423	6.38e-05	0.000248009	0.0022015	2.59e-05	0.000100681	0.002856	3.36e-05	0.000130613	0.005474	6.44e-05	0.000250341	0.0006987	8.22e-06	3.19535e-05	2.8475	0.0335	0.130224	9.095	0.107	0.41594	3.1535e-08	3.71e-10	1.44218e-09	0.0034765	4.09e-05	0.00015899	1.496e-10	1.76e-12	6.84162e-12
31103010	Egg, whole, boiled or poached	Protein Foods	Eggs	Eggs	Animal-based (other)	50	1.16619	0.3385	0.00677	0.00789508	0.3325	0.00665	0.00775514	0.37	0.0074	0.00862978	1.775	0.0355	0.0413996	0.00765	0.000153	0.000178426	0.000755	1.51e-05	1.76094e-05	0.00177	3.54e-05	4.1283e-05	0.0002605	5.21e-06	6.07583e-06	5.9e-05	1.18e-06	1.3761e-06	2.425	0.0485	0.05656	1.97	0.0394	0.0459477	1.9e-08	3.8e-10	4.43151e-10	0.01105	0.000221	0.000257727	3.315e-11	6.63e-13	7.73181e-13
41104020	Pinto, calico, or red Mexican beans, dry, cooked, fat not added in cooking	Protein Foods	Legumes	Legumes and soy products	Plant-based, other	90	4.04278	0.006975	7.75e-05	0.000313315	0.006795	7.55e-05	0.00030523	0.005319	5.91e-05	0.000238928	0.07803	0.000867	0.00350509	0.0003051	3.39e-06	1.3705e-05	3.753e-05	4.17e-07	1.68584e-06	5.76e-05	6.4e-07	2.58738e-06	8.289e-06	9.21e-08	3.7234e-07	2.304e-06	2.56e-08	1.03495e-07	0.03204	0.000356	0.00143923	0.1674	0.00186	0.00751957	3.402e-10	3.78e-12	1.52817e-11	0.005553	6.17e-05	0.000249439	2.781e-12	3.09e-14	1.24922e-13
42111200	Peanuts, dry roasted, salted	Protein Foods	Nuts and seeds	Nuts and seeds	Nuts and seeds	30	0.388729	0.0717	0.00239	0.000929061	0.0702	0.00234	0.000909625	0.1803	0.00601	0.00233626	0.318	0.0106	0.00412052	0.001044	3.48e-05	1.35278e-05	0.0002184	7.28e-06	2.82994e-06	0.000657	2.19e-05	8.51316e-06	7.59e-05	2.53e-06	9.83483e-07	2.121e-05	7.07e-07	2.74831e-07	0.2655	0.00885	0.00344025	0.1431	0.00477	0.00185424	3.27e-09	1.09e-10	4.23714e-11	0.00525	0.000175	6.80275e-05	7.23e-12	2.41e-13	9.36836e-14
56203010	Oatmeal, cooked, regular, fat not added in cooking	Grains	Grains	Cooked Cereals	Plant-based, other	234	4.27601	0.046566	0.000199	0.000850927	0.045396	0.000194	0.000829547	0.194688	0.000832	0.00355764	0.233064	0.000996	0.00425891	0.00075348	3.22e-06	1.37688e-05	0.00016848	7.2e-07	3.07873e-06	0.0004446	1.9e-06	8.12443e-06	0.000125892	5.38e-07	2.3005e-06	1.40166e-05	5.99e-08	2.56133e-07	0.37206	0.00159	0.00679886	0.13221	0.000565	0.00241595	2.808e-09	1.2e-11	5.13122e-11	0.0106236	4.54e-05	0.000194131	5.967e-12	2.55e-14	1.09038e-13
56205008	Rice, white, cooked, fat not added in cooking	Grains	Grains	Cooked Grains	Plant-based, other	140	3.10983	0.2044	0.00146	0.00454035	0.11886	0.000849	0.00264024	0.1337	0.000955	0.00296989	0.8162	0.00583	0.0181303	0.003094	2.21e-05	6.87272e-05	0.0003094	2.21e-06	6.87272e-06	0.0004914	3.51e-06	1.09155e-05	0.0001582	1.13e-06	3.51411e-06	1.2278e-05	8.77e-08	2.72732e-07	2.198	0.0157	0.0488243	0.707	0.00505	0.0157046	7.028e-09	5.02e-11	1.56113e-10	0.04326	0.000309	0.000960937	1.0934e-11	7.81e-14	2.42878e-13
63107010	Banana, raw	Fruit	Fruits	Fruits	Plant-based, other	140	9.32949	0.02772	0.000198	0.00184724	0.02646	0.000189	0.00176327	0.011676	8.34e-05	0.000778079	0.2996	0.00214	0.0199651	0.0011298	8.07e-06	7.5289e-05	0.0002352	1.68e-06	1.56735e-05	0.0009954	7.11e-06	6.63327e-05	5.95e-05	4.25e-07	3.96503e-06	3.248e-05	2.32e-07	2.16444e-06	0.2268	0.00162	0.0151138	0.1932	0.00138	0.0128747	2.002e-09	1.43e-11	1.33412e-10	0.0336	0.00024	0.00223908	4.256e-12	3.04e-14	2.83616e-13
75113000	Lettuce, raw	Vegetables	Vegetables	Vegetables, excluding starchy	Plant-based, other	85	10.1069	0.030345	0.000357	0.00360818	0.029155	0.000343	0.00346668	0.016745	0.000197	0.00199107	0.26095	0.00307	0.0310283	0.00060605	7.13e-06	7.20625e-05	0.00011475	1.35e-06	1.36444e-05	0.00015215	1.79e-06	1.80914e-05	2.1335e-05	2.51e-07	2.53684e-06	4.4285e-06	5.21e-08	5.26572e-07	0.17	0.002	0.0202139	0.1343	0.00158	0.015969	2.9325e-09	3.45e-11	3.4869e-10	0.005372	6.32e-05	0.000638759	6.4175e-12	7.55e-14	7.63074e-13
83106000	Italian dressing, made with vinegar and oil	Fats and Oils	Fats and Oils	Oils	Plant-based, other	30	0.777457	0.093	0.0031	0.00241012	0.0918	0.00306	0.00237902	0.1746	0.00582	0.0045248	0.504	0.0168	0.0130613	0.000987	3.29e-05	2.55783e-05	0.0002271	7.57e-06	5.88535e-06	0.000564	1.88e-05	1.46162e-05	9.24e-05	3.08e-06	2.39457e-06	1.977e-05	6.59e-07	5.12344e-07	10.56	0.352	0.273665	0.516	0.0172	0.0133723	5.22e-09	1.74e-10	1.35278e-10	0.00693	0.000231	0.000179593	1.248e-11	4.16e-13	3.23422e-13
92552010	Fruit flavored drink, powdered, reconstituted, diet	Beverages, Nonalcoholic	Beverages, Nonalcoholic	Diet Beverages	Other	240	7.77457	0.000312	1.3e-06	1.01069e-05	0.0002976	1.24e-06	9.64047e-06	0.000468	1.95e-06	1.51604e-05	0.003144	1.31e-05	0.000101847	1.8072e-05	7.53e-08	5.85425e-07	9.36e-07	3.9e-09	3.03208e-08	2.0016e-06	8.34e-09	6.484e-08	4.92e-07	2.05e-09	1.59379e-08	1.3128e-07	5.47e-10	4.25269e-09	0.003192	1.33e-05	0.000103402	0.002712	1.13e-05	8.78527e-05	2.712e-11	1.13e-13	8.78527e-13	3.264e-05	1.36e-07	1.05734e-06	3.36e-14	1.4e-16	1.08844e-15
				Emissions from Diet						0.117507			0.0961368			0.0909558			0.826776			0.00116587			0.000321721			0.000746685			0.000319869			5.40918e-05			0.762594			1.27526			5.52351e-09			0.00686774			1.46861e-11
TABLE 17: EMISSION CALCULATION FOR S7M3
		Characteristics of select foods						Impact Categories
WWEIA Foodcode	Food Description	USDA Main Group	Food subgroup	HENI category	Main ingredient contributing to environmental impacts	RACC (g/serving)	Qty of Diet	Global warming, shorter term (kg CO2 eq/serving)			Global warming, long term (kg CO2 eq/serving)			Land occupation, biodiversity (ha-yr arable/serving)			Fossil energy use (MJ/serving)			Mineral resources use (kg deprived/serving)			Freshwater acidification (kg SO2 eq/serving)			Terrestrial acidification (kg SO2 eq/serving)			Freshwater eutrophication (kg PO4---P- eq/serving)			Marine eutrophication (kg N eq/serving)			Freshwater ecotoxicity (CTUe/serving)			Ionizing radiation (Bq C-14 eq/serving)			Ozone Layer Depletion (kg CFC-11 eq/serving)			Water use (m3/serving)			Photochemical oxidant formation (DALYs/serving)
								HH, EQ			HH, EQ			EQ									EQ			EQ			EQ			EQ			EQ			HH, EQ			HH, EQ						HH
								Mean	Factor	Future Food	Mean	Factor	FF	Mean	Factor	FF	Mean	Factor	FF	Mean	Factor	FF	Mean	Factor	FF	Mean	Factor	FF	Mean	Factor	FF	Mean	Factor	FF	Mean	Factor	FF	Mean	Factor	FF	Mean	Factor	FF	Mean	Factor	FF	Mean	Factor	FF
11111000	Milk, whole	Milk and Dairy	Dairy	Milk	Dairy	244	7.80041	0.62952	0.00258	0.020125	0.40504	0.00166	0.0129487	0.29768	0.00122	0.0095165	2.03496	0.00834	0.0650554	0.0027328	1.12e-05	8.73646e-05	0.00102724	4.21e-06	3.28397e-05	0.0026596	1.09e-05	8.50244e-05	0.00025376	1.04e-06	8.11242e-06	8.906e-05	3.65e-07	2.84715e-06	1.70312	0.00698	0.0544468	3.172	0.013	0.101405	1.88856e-08	7.74e-11	6.03751e-10	0.0207888	8.52e-05	0.000664595	3.6844e-11	1.51e-13	1.17786e-12
21500100	Ground beef, cooked	Protein Foods	Beef	Red meat	Beef	85	0.811242	3.1705	0.0373	0.0302593	2.227	0.0262	0.0212545	2.227	0.0262	0.0212545	15.13	0.178	0.144401	0.024225	0.000285	0.000231204	0.0081855	9.63e-05	7.81226e-05	0.02431	0.000286	0.000232015	0.002346	2.76e-05	2.23903e-05	0.0008585	1.01e-05	8.19355e-06	9.605	0.113	0.0916704	25.5	0.3	0.243373	1.2665e-07	1.49e-09	1.20875e-09	7.106e-05	8.36e-07	6.78199e-07	2.635e-10	3.1e-12	2.51485e-12
24144210	Chicken, drumstick, fried, no coating, skin eaten, NS as to type of fat added in cooking	Protein Foods	Poultry	Poultry	Poultry	85	1.57568	0.44115	0.00519	0.00817779	0.41395	0.00487	0.00767357	0.73865	0.00869	0.0136927	3.9865	0.0469	0.0738995	0.005406	6.36e-05	0.000100213	0.0016235	1.91e-05	3.00955e-05	0.0048365	5.69e-05	8.96563e-05	0.00069615	8.19e-06	1.29048e-05	0.00016405	1.93e-06	3.04107e-06	2.2015	0.0259	0.0408102	4.352	0.0512	0.080675	3.74e-08	4.4e-10	6.933e-10	0.02006	0.000236	0.000371861	5.4655e-11	6.43e-13	1.01316e-12
25221405	Pork sausage	Protein Foods	Processed meat	Cured Meats/Poultry	Processed meat	55	0.468024	0.3905	0.0071	0.00332297	0.2761	0.00502	0.00234948	0.2354	0.00428	0.00200314	4.3615	0.0793	0.0371143	0.0027445	4.99e-05	2.33544e-05	0.0009295	1.69e-05	7.90961e-06	0.0028435	5.17e-05	2.41969e-05	0.0002904	5.28e-06	2.47117e-06	0.0001848	3.36e-06	1.57256e-06	1.408	0.0256	0.0119814	22.605	0.411	0.192358	1.8205e-08	3.31e-10	1.54916e-10	0.0627	0.00114	0.000533548	3.1075e-11	5.65e-13	2.64434e-13
26137120	Salmon, baked or broiled, made with oil	Protein Foods	Seafood	Seafood	Seafood	85	3.9002	0.68255	0.00803	0.0313186	0.66555	0.00783	0.0305386	0.3995	0.0047	0.018331	7.5905	0.0893	0.348288	0.005423	6.38e-05	0.000248833	0.0022015	2.59e-05	0.000101015	0.002856	3.36e-05	0.000131047	0.005474	6.44e-05	0.000251173	0.0006987	8.22e-06	3.20597e-05	2.8475	0.0335	0.130657	9.095	0.107	0.417322	3.1535e-08	3.71e-10	1.44698e-09	0.0034765	4.09e-05	0.000159518	1.496e-10	1.76e-12	6.86436e-12
31103010	Egg, whole, boiled or poached	Protein Foods	Eggs	Eggs	Animal-based (other)	50	1.17006	0.3385	0.00677	0.00792132	0.3325	0.00665	0.00778091	0.37	0.0074	0.00865845	1.775	0.0355	0.0415372	0.00765	0.000153	0.000179019	0.000755	1.51e-05	1.76679e-05	0.00177	3.54e-05	4.14202e-05	0.0002605	5.21e-06	6.09602e-06	5.9e-05	1.18e-06	1.38067e-06	2.425	0.0485	0.056748	1.97	0.0394	0.0461004	1.9e-08	3.8e-10	4.44623e-10	0.01105	0.000221	0.000258584	3.315e-11	6.63e-13	7.75751e-13
41104020	Pinto, calico, or red Mexican beans, dry, cooked, fat not added in cooking	Protein Foods	Legumes	Legumes and soy products	Plant-based, other	90	4.29022	0.006975	7.75e-05	0.000332492	0.006795	7.55e-05	0.000323912	0.005319	5.91e-05	0.000253552	0.07803	0.000867	0.00371962	0.0003051	3.39e-06	1.45439e-05	3.753e-05	4.17e-07	1.78902e-06	5.76e-05	6.4e-07	2.74574e-06	8.289e-06	9.21e-08	3.9513e-07	2.304e-06	2.56e-08	1.0983e-07	0.03204	0.000356	0.00152732	0.1674	0.00186	0.00797982	3.402e-10	3.78e-12	1.6217e-11	0.005553	6.17e-05	0.000264707	2.781e-12	3.09e-14	1.32568e-13
42111200	Peanuts, dry roasted, salted	Protein Foods	Nuts and seeds	Nuts and seeds	Nuts and seeds	30	0.39002	0.0717	0.00239	0.000932149	0.0702	0.00234	0.000912648	0.1803	0.00601	0.00234402	0.318	0.0106	0.00413422	0.001044	3.48e-05	1.35727e-05	0.0002184	7.28e-06	2.83935e-06	0.000657	2.19e-05	8.54145e-06	7.59e-05	2.53e-06	9.86751e-07	2.121e-05	7.07e-07	2.75744e-07	0.2655	0.00885	0.00345168	0.1431	0.00477	0.0018604	3.27e-09	1.09e-10	4.25122e-11	0.00525	0.000175	6.82536e-05	7.23e-12	2.41e-13	9.39949e-14
56203010	Oatmeal, cooked, regular, fat not added in cooking	Grains	Grains	Cooked Cereals	Plant-based, other	234	4.36823	0.046566	0.000199	0.000869277	0.045396	0.000194	0.000847436	0.194688	0.000832	0.00363437	0.233064	0.000996	0.00435075	0.00075348	3.22e-06	1.40657e-05	0.00016848	7.2e-07	3.14512e-06	0.0004446	1.9e-06	8.29963e-06	0.000125892	5.38e-07	2.35011e-06	1.40166e-05	5.99e-08	2.61657e-07	0.37206	0.00159	0.00694548	0.13221	0.000565	0.00246805	2.808e-09	1.2e-11	5.24187e-11	0.0106236	4.54e-05	0.000198318	5.967e-12	2.55e-14	1.1139e-13
56205008	Rice, white, cooked, fat not added in cooking	Grains	Grains	Cooked Grains	Plant-based, other	140	3.12016	0.2044	0.00146	0.00455544	0.11886	0.000849	0.00264902	0.1337	0.000955	0.00297976	0.8162	0.00583	0.0181905	0.003094	2.21e-05	6.89556e-05	0.0003094	2.21e-06	6.89556e-06	0.0004914	3.51e-06	1.09518e-05	0.0001582	1.13e-06	3.52578e-06	1.2278e-05	8.77e-08	2.73638e-07	2.198	0.0157	0.0489866	0.707	0.00505	0.0157568	7.028e-09	5.02e-11	1.56632e-10	0.04326	0.000309	0.00096413	1.0934e-11	7.81e-14	2.43685e-13
63107010	Banana, raw	Fruit	Fruits	Fruits	Plant-based, other	140	9.36049	0.02772	0.000198	0.00185338	0.02646	0.000189	0.00176913	0.011676	8.34e-05	0.000780665	0.2996	0.00214	0.0200314	0.0011298	8.07e-06	7.55391e-05	0.0002352	1.68e-06	1.57256e-05	0.0009954	7.11e-06	6.65531e-05	5.95e-05	4.25e-07	3.97821e-06	3.248e-05	2.32e-07	2.17163e-06	0.2268	0.00162	0.015164	0.1932	0.00138	0.0129175	2.002e-09	1.43e-11	1.33855e-10	0.0336	0.00024	0.00224652	4.256e-12	3.04e-14	2.84559e-13
75113000	Lettuce, raw	Vegetables	Vegetables	Vegetables, excluding starchy	Plant-based, other	85	10.1405	0.030345	0.000357	0.00362017	0.029155	0.000343	0.0034782	0.016745	0.000197	0.00199768	0.26095	0.00307	0.0311314	0.00060605	7.13e-06	7.2302e-05	0.00011475	1.35e-06	1.36897e-05	0.00015215	1.79e-06	1.81515e-05	2.1335e-05	2.51e-07	2.54527e-06	4.4285e-06	5.21e-08	5.28322e-07	0.17	0.002	0.0202811	0.1343	0.00158	0.016022	2.9325e-09	3.45e-11	3.49848e-10	0.005372	6.32e-05	0.000640881	6.4175e-12	7.55e-14	7.6561e-13
83106000	Italian dressing, made with vinegar and oil	Fats and Oils	Fats and Oils	Oils	Plant-based, other	30	0.780041	0.093	0.0031	0.00241813	0.0918	0.00306	0.00238692	0.1746	0.00582	0.00453984	0.504	0.0168	0.0131047	0.000987	3.29e-05	2.56633e-05	0.0002271	7.57e-06	5.90491e-06	0.000564	1.88e-05	1.46648e-05	9.24e-05	3.08e-06	2.40253e-06	1.977e-05	6.59e-07	5.14047e-07	10.56	0.352	0.274574	0.516	0.0172	0.0134167	5.22e-09	1.74e-10	1.35727e-10	0.00693	0.000231	0.000180189	1.248e-11	4.16e-13	3.24497e-13
92552010	Fruit flavored drink, powdered, reconstituted, diet	Beverages, Nonalcoholic	Beverages, Nonalcoholic	Diet Beverages	Other	240	7.80041	0.000312	1.3e-06	1.01405e-05	0.0002976	1.24e-06	9.67251e-06	0.000468	1.95e-06	1.52108e-05	0.003144	1.31e-05	0.000102185	1.8072e-05	7.53e-08	5.87371e-07	9.36e-07	3.9e-09	3.04216e-08	2.0016e-06	8.34e-09	6.50554e-08	4.92e-07	2.05e-09	1.59908e-08	1.3128e-07	5.47e-10	4.26682e-09	0.003192	1.33e-05	0.000103745	0.002712	1.13e-05	8.81446e-05	2.712e-11	1.13e-13	8.81446e-13	3.264e-05	1.36e-07	1.06086e-06	3.36e-14	1.4e-16	1.09206e-15
			Emissions from Diet							0.115716			0.0949227			0.0900014			0.805061			0.00115522			0.00031767			0.000733333			0.000319348			5.32338e-05			0.757348			1.15174			5.44041e-09			0.00655284			1.45678e-11
TABLE 18: EMISSION CALCULATION FOR S8M1
		Characteristics of select foods						Impact Categories
WWEIA Foodcode	Food Description	USDA Main Group	Food subgroup	HENI category	Main ingredient contributing to environmental impacts	RACC (g/serving)	Qty of Diet	Global warming, shorter term (kg CO2 eq/serving)			Global warming, long term (kg CO2 eq/serving)			Land occupation, biodiversity (ha-yr arable/serving)			Fossil energy use (MJ/serving)			Mineral resources use (kg deprived/serving)			Freshwater acidification (kg SO2 eq/serving)			Terrestrial acidification (kg SO2 eq/serving)			Freshwater eutrophication (kg PO4---P- eq/serving)			Marine eutrophication (kg N eq/serving)			Freshwater ecotoxicity (CTUe/serving)			Ionizing radiation (Bq C-14 eq/serving)			Ozone Layer Depletion (kg CFC-11 eq/serving)			Water use (m3/serving)			Photochemical oxidant formation (DALYs/serving)
								HH, EQ			HH, EQ			EQ									EQ			EQ			EQ			EQ			EQ			HH, EQ			HH, EQ						HH
								Mean	Factor	Future Food	Mean	Factor	FF	Mean	Factor	FF	Mean	Factor	FF	Mean	Factor	FF	Mean	Factor	FF	Mean	Factor	FF	Mean	Factor	FF	Mean	Factor	FF	Mean	Factor	FF	Mean	Factor	FF	Mean	Factor	FF	Mean	Factor	FF	Mean	Factor	FF
11111000	Milk, whole	Milk and Dairy	Dairy	Milk	Dairy	244	7.63301	0.62952	0.00258	0.0196932	0.40504	0.00166	0.0126708	0.29768	0.00122	0.00931227	2.03496	0.00834	0.0636593	0.0027328	1.12e-05	8.54897e-05	0.00102724	4.21e-06	3.2135e-05	0.0026596	1.09e-05	8.31998e-05	0.00025376	1.04e-06	7.93833e-06	8.906e-05	3.65e-07	2.78605e-06	1.70312	0.00698	0.0532784	3.172	0.013	0.0992291	1.88856e-08	7.74e-11	5.90795e-10	0.0207888	8.52e-05	0.000650332	3.6844e-11	1.51e-13	1.15258e-12
21500100	Ground beef, cooked	Protein Foods	Beef	Red meat	Beef	85	0.427449	3.1705	0.0373	0.0159438	2.227	0.0262	0.0111992	2.227	0.0262	0.0111992	15.13	0.178	0.0760858	0.024225	0.000285	0.000121823	0.0081855	9.63e-05	4.11633e-05	0.02431	0.000286	0.00012225	0.002346	2.76e-05	1.17976e-05	0.0008585	1.01e-05	4.31723e-06	9.605	0.113	0.0483017	25.5	0.3	0.128235	1.2665e-07	1.49e-09	6.36898e-10	7.106e-05	8.36e-07	3.57347e-07	2.635e-10	3.1e-12	1.32509e-12
24144210	Chicken, drumstick, fried, no coating, skin eaten, NS as to type of fat added in cooking	Protein Foods	Poultry	Poultry	Poultry	85	1.90825	0.44115	0.00519	0.00990382	0.41395	0.00487	0.00929318	0.73865	0.00869	0.0165827	3.9865	0.0469	0.089497	0.005406	6.36e-05	0.000121365	0.0016235	1.91e-05	3.64476e-05	0.0048365	5.69e-05	0.000108579	0.00069615	8.19e-06	1.56286e-05	0.00016405	1.93e-06	3.68292e-06	2.2015	0.0259	0.0494237	4.352	0.0512	0.0977025	3.74e-08	4.4e-10	8.39631e-10	0.02006	0.000236	0.000450347	5.4655e-11	6.43e-13	1.22701e-12
25221405	Pork sausage	Protein Foods	Processed meat	Cured Meats/Poultry	Processed meat	55	0.763301	0.3905	0.0071	0.00541944	0.2761	0.00502	0.00383177	0.2354	0.00428	0.00326693	4.3615	0.0793	0.0605298	0.0027445	4.99e-05	3.80887e-05	0.0009295	1.69e-05	1.28998e-05	0.0028435	5.17e-05	3.94627e-05	0.0002904	5.28e-06	4.03023e-06	0.0001848	3.36e-06	2.56469e-06	1.408	0.0256	0.0195405	22.605	0.411	0.313717	1.8205e-08	3.31e-10	2.52653e-10	0.0627	0.00114	0.000870163	3.1075e-11	5.65e-13	4.31265e-13
26137120	Salmon, baked or broiled, made with oil	Protein Foods	Seafood	Seafood	Seafood	85	3.8165	0.68255	0.00803	0.0306465	0.66555	0.00783	0.0298832	0.3995	0.0047	0.0179376	7.5905	0.0893	0.340814	0.005423	6.38e-05	0.000243493	0.0022015	2.59e-05	9.88475e-05	0.002856	3.36e-05	0.000128235	0.005474	6.44e-05	0.000245783	0.0006987	8.22e-06	3.13717e-05	2.8475	0.0335	0.127853	9.095	0.107	0.408366	3.1535e-08	3.71e-10	1.41592e-09	0.0034765	4.09e-05	0.000156095	1.496e-10	1.76e-12	6.71705e-12
31103010	Egg, whole, boiled or poached	Protein Foods	Eggs	Eggs	Animal-based (other)	50	1.14495	0.3385	0.00677	0.00775132	0.3325	0.00665	0.00761392	0.37	0.0074	0.00847264	1.775	0.0355	0.0406458	0.00765	0.000153	0.000175177	0.000755	1.51e-05	1.72888e-05	0.00177	3.54e-05	4.05313e-05	0.0002605	5.21e-06	5.96519e-06	5.9e-05	1.18e-06	1.35104e-06	2.425	0.0485	0.0555301	1.97	0.0394	0.0451111	1.9e-08	3.8e-10	4.35081e-10	0.01105	0.000221	0.000253034	3.315e-11	6.63e-13	7.59102e-13
41104020	Pinto, calico, or red Mexican beans, dry, cooked, fat not added in cooking	Protein Foods	Legumes	Legumes and soy products	Plant-based, other	90	4.15236	0.006975	7.75e-05	0.000321808	0.006795	7.55e-05	0.000313503	0.005319	5.91e-05	0.000245404	0.07803	0.000867	0.00360009	0.0003051	3.39e-06	1.40765e-05	3.753e-05	4.17e-07	1.73153e-06	5.76e-05	6.4e-07	2.65751e-06	8.289e-06	9.21e-08	3.82432e-07	2.304e-06	2.56e-08	1.063e-07	0.03204	0.000356	0.00147824	0.1674	0.00186	0.00772338	3.402e-10	3.78e-12	1.56959e-11	0.005553	6.17e-05	0.0002562	2.781e-12	3.09e-14	1.28308e-13
42111200	Peanuts, dry roasted, salted	Protein Foods	Nuts and seeds	Nuts and seeds	Nuts and seeds	30	0.38165	0.0717	0.00239	0.000912145	0.0702	0.00234	0.000893062	0.1803	0.00601	0.00229372	0.318	0.0106	0.0040455	0.001044	3.48e-05	1.32814e-05	0.0002184	7.28e-06	2.77842e-06	0.000657	2.19e-05	8.35815e-06	7.59e-05	2.53e-06	9.65576e-07	2.121e-05	7.07e-07	2.69827e-07	0.2655	0.00885	0.00337761	0.1431	0.00477	0.00182047	3.27e-09	1.09e-10	4.15999e-11	0.00525	0.000175	6.67888e-05	7.23e-12	2.41e-13	9.19778e-14
56203010	Oatmeal, cooked, regular, fat not added in cooking	Grains	Grains	Cooked Cereals	Plant-based, other	234	4.19816	0.046566	0.000199	0.000835433	0.045396	0.000194	0.000814442	0.194688	0.000832	0.00349287	0.233064	0.000996	0.00418136	0.00075348	3.22e-06	1.35181e-05	0.00016848	7.2e-07	3.02267e-06	0.0004446	1.9e-06	7.9765e-06	0.000125892	5.38e-07	2.25861e-06	1.40166e-05	5.99e-08	2.5147e-07	0.37206	0.00159	0.00667507	0.13221	0.000565	0.00237196	2.808e-09	1.2e-11	5.03779e-11	0.0106236	4.54e-05	0.000190596	5.967e-12	2.55e-14	1.07053e-13
56205008	Rice, white, cooked, fat not added in cooking	Grains	Grains	Cooked Grains	Plant-based, other	140	3.0532	0.2044	0.00146	0.00445768	0.11886	0.000849	0.00259217	0.1337	0.000955	0.00291581	0.8162	0.00583	0.0178002	0.003094	2.21e-05	6.74758e-05	0.0003094	2.21e-06	6.74758e-06	0.0004914	3.51e-06	1.07167e-05	0.0001582	1.13e-06	3.45012e-06	1.2278e-05	8.77e-08	2.67766e-07	2.198	0.0157	0.0479353	0.707	0.00505	0.0154187	7.028e-09	5.02e-11	1.53271e-10	0.04326	0.000309	0.00094344	1.0934e-11	7.81e-14	2.38455e-13
63107010	Banana, raw	Fruit	Fruits	Fruits	Plant-based, other	140	9.15961	0.02772	0.000198	0.0018136	0.02646	0.000189	0.00173117	0.011676	8.34e-05	0.000763912	0.2996	0.00214	0.0196016	0.0011298	8.07e-06	7.39181e-05	0.0002352	1.68e-06	1.53881e-05	0.0009954	7.11e-06	6.51248e-05	5.95e-05	4.25e-07	3.89283e-06	3.248e-05	2.32e-07	2.12503e-06	0.2268	0.00162	0.0148386	0.1932	0.00138	0.0126403	2.002e-09	1.43e-11	1.30982e-10	0.0336	0.00024	0.00219831	4.256e-12	3.04e-14	2.78452e-13
75113000	Lettuce, raw	Vegetables	Vegetables	Vegetables, excluding starchy	Plant-based, other	85	9.92291	0.030345	0.000357	0.00354248	0.029155	0.000343	0.00340356	0.016745	0.000197	0.00195481	0.26095	0.00307	0.0304633	0.00060605	7.13e-06	7.07504e-05	0.00011475	1.35e-06	1.33959e-05	0.00015215	1.79e-06	1.7762e-05	2.1335e-05	2.51e-07	2.49065e-06	4.4285e-06	5.21e-08	5.16984e-07	0.17	0.002	0.0198458	0.1343	0.00158	0.0156782	2.9325e-09	3.45e-11	3.4234e-10	0.005372	6.32e-05	0.000627128	6.4175e-12	7.55e-14	7.4918e-13
83106000	Italian dressing, made with vinegar and oil	Fats and Oils	Fats and Oils	Oils	Plant-based, other	30	0.763301	0.093	0.0031	0.00236623	0.0918	0.00306	0.0023357	0.1746	0.00582	0.00444241	0.504	0.0168	0.0128235	0.000987	3.29e-05	2.51126e-05	0.0002271	7.57e-06	5.77819e-06	0.000564	1.88e-05	1.43501e-05	9.24e-05	3.08e-06	2.35097e-06	1.977e-05	6.59e-07	5.03015e-07	10.56	0.352	0.268682	0.516	0.0172	0.0131288	5.22e-09	1.74e-10	1.32814e-10	0.00693	0.000231	0.000176323	1.248e-11	4.16e-13	3.17533e-13
92552010	Fruit flavored drink, powdered, reconstituted, diet	Beverages, Nonalcoholic	Beverages, Nonalcoholic	Diet Beverages	Other	240	7.63301	0.000312	1.3e-06	9.92291e-06	0.0002976	1.24e-06	9.46493e-06	0.000468	1.95e-06	1.48844e-05	0.003144	1.31e-05	9.99924e-05	1.8072e-05	7.53e-08	5.74765e-07	9.36e-07	3.9e-09	2.97687e-08	2.0016e-06	8.34e-09	6.36593e-08	4.92e-07	2.05e-09	1.56477e-08	1.3128e-07	5.47e-10	4.17525e-09	0.003192	1.33e-05	0.000101519	0.002712	1.13e-05	8.6253e-05	2.712e-11	1.13e-13	8.6253e-13	3.264e-05	1.36e-07	1.03809e-06	3.36e-14	1.4e-16	1.06862e-15
				Emissions from Diet						0.103617			0.0865851			0.0828951			0.763847			0.00106414			0.000287654			0.000649268			0.00030695			5.01182e-05			0.716861			1.16123			5.03893e-09			0.00684015			1.35241e-11
TABLE 19: EMISSION CALCULATION FOR S8M2
		Characteristics of select foods						Impact Categories
WWEIA Foodcode	Food Description	USDA Main Group	Food subgroup	HENI category	Main ingredient contributing to environmental impacts	RACC (g/serving)	Qty of Diet	Global warming, shorter term (kg CO2 eq/serving)			Global warming, long term (kg CO2 eq/serving)			Land occupation, biodiversity (ha-yr arable/serving)			Fossil energy use (MJ/serving)			Mineral resources use (kg deprived/serving)			Freshwater acidification (kg SO2 eq/serving)			Terrestrial acidification (kg SO2 eq/serving)			Freshwater eutrophication (kg PO4---P- eq/serving)			Marine eutrophication (kg N eq/serving)			Freshwater ecotoxicity (CTUe/serving)			Ionizing radiation (Bq C-14 eq/serving)			Ozone Layer Depletion (kg CFC-11 eq/serving)			Water use (m3/serving)			Photochemical oxidant formation (DALYs/serving)
								HH, EQ			HH, EQ			EQ									EQ			EQ			EQ			EQ			EQ			HH, EQ			HH, EQ						HH
								Mean	Factor	Future Food	Mean	Factor	FF	Mean	Factor	FF	Mean	Factor	FF	Mean	Factor	FF	Mean	Factor	FF	Mean	Factor	FF	Mean	Factor	FF	Mean	Factor	FF	Mean	Factor	FF	Mean	Factor	FF	Mean	Factor	FF	Mean	Factor	FF	Mean	Factor	FF
11111000	Milk, whole	Milk and Dairy	Dairy	Milk	Dairy	244	7.76618	0.62952	0.00258	0.0200367	0.40504	0.00166	0.0128919	0.29768	0.00122	0.00947474	2.03496	0.00834	0.0647699	0.0027328	1.12e-05	8.69812e-05	0.00102724	4.21e-06	3.26956e-05	0.0026596	1.09e-05	8.46514e-05	0.00025376	1.04e-06	8.07683e-06	8.906e-05	3.65e-07	2.83466e-06	1.70312	0.00698	0.0542079	3.172	0.013	0.10096	1.88856e-08	7.74e-11	6.01102e-10	0.0207888	8.52e-05	0.000661679	3.6844e-11	1.51e-13	1.17269e-12
21500100	Ground beef, cooked	Protein Foods	Beef	Red meat	Beef	85	0.434906	3.1705	0.0373	0.016222	2.227	0.0262	0.0113945	2.227	0.0262	0.0113945	15.13	0.178	0.0774133	0.024225	0.000285	0.000123948	0.0081855	9.63e-05	4.18815e-05	0.02431	0.000286	0.000124383	0.002346	2.76e-05	1.20034e-05	0.0008585	1.01e-05	4.39255e-06	9.605	0.113	0.0491444	25.5	0.3	0.130472	1.2665e-07	1.49e-09	6.4801e-10	7.106e-05	8.36e-07	3.63581e-07	2.635e-10	3.1e-12	1.34821e-12
24144210	Chicken, drumstick, fried, no coating, skin eaten, NS as to type of fat added in cooking	Protein Foods	Poultry	Poultry	Poultry	85	1.56877	0.44115	0.00519	0.0081419	0.41395	0.00487	0.00763989	0.73865	0.00869	0.0136326	3.9865	0.0469	0.0735751	0.005406	6.36e-05	9.97735e-05	0.0016235	1.91e-05	2.99634e-05	0.0048365	5.69e-05	8.92628e-05	0.00069615	8.19e-06	1.28482e-05	0.00016405	1.93e-06	3.02772e-06	2.2015	0.0259	0.040631	4.352	0.0512	0.0803208	3.74e-08	4.4e-10	6.90257e-10	0.02006	0.000236	0.000370229	5.4655e-11	6.43e-13	1.00872e-12
25221405	Pork sausage	Protein Foods	Processed meat	Cured Meats/Poultry	Processed meat	55	0.776618	0.3905	0.0071	0.00551399	0.2761	0.00502	0.00389862	0.2354	0.00428	0.00332392	4.3615	0.0793	0.0615858	0.0027445	4.99e-05	3.87532e-05	0.0009295	1.69e-05	1.31248e-05	0.0028435	5.17e-05	4.01511e-05	0.0002904	5.28e-06	4.10054e-06	0.0001848	3.36e-06	2.60944e-06	1.408	0.0256	0.0198814	22.605	0.411	0.31919	1.8205e-08	3.31e-10	2.57061e-10	0.0627	0.00114	0.000885344	3.1075e-11	5.65e-13	4.38789e-13
26137120	Salmon, baked or broiled, made with oil	Protein Foods	Seafood	Seafood	Seafood	85	3.88309	0.68255	0.00803	0.0311812	0.66555	0.00783	0.0304046	0.3995	0.0047	0.0182505	7.5905	0.0893	0.34676	0.005423	6.38e-05	0.000247741	0.0022015	2.59e-05	0.000100572	0.002856	3.36e-05	0.000130472	0.005474	6.44e-05	0.000250071	0.0006987	8.22e-06	3.1919e-05	2.8475	0.0335	0.130084	9.095	0.107	0.415491	3.1535e-08	3.71e-10	1.44063e-09	0.0034765	4.09e-05	0.000158818	1.496e-10	1.76e-12	6.83424e-12
31103010	Egg, whole, boiled or poached	Protein Foods	Eggs	Eggs	Animal-based (other)	50	1.16493	0.3385	0.00677	0.00788655	0.3325	0.00665	0.00774675	0.37	0.0074	0.00862045	1.775	0.0355	0.0413549	0.00765	0.000153	0.000178234	0.000755	1.51e-05	1.75904e-05	0.00177	3.54e-05	4.12384e-05	0.0002605	5.21e-06	6.06926e-06	5.9e-05	1.18e-06	1.37461e-06	2.425	0.0485	0.0564989	1.97	0.0394	0.0458981	1.9e-08	3.8e-10	4.42672e-10	0.01105	0.000221	0.000257449	3.315e-11	6.63e-13	7.72346e-13
41104020	Pinto, calico, or red Mexican beans, dry, cooked, fat not added in cooking	Protein Foods	Legumes	Legumes and soy products	Plant-based, other	90	4.50438	0.006975	7.75e-05	0.00034909	0.006795	7.55e-05	0.000340081	0.005319	5.91e-05	0.000266209	0.07803	0.000867	0.0039053	0.0003051	3.39e-06	1.52699e-05	3.753e-05	4.17e-07	1.87833e-06	5.76e-05	6.4e-07	2.88281e-06	8.289e-06	9.21e-08	4.14854e-07	2.304e-06	2.56e-08	1.15312e-07	0.03204	0.000356	0.00160356	0.1674	0.00186	0.00837815	3.402e-10	3.78e-12	1.70266e-11	0.005553	6.17e-05	0.000277921	2.781e-12	3.09e-14	1.39185e-13
42111200	Peanuts, dry roasted, salted	Protein Foods	Nuts and seeds	Nuts and seeds	Nuts and seeds	30	0.388309	0.0717	0.00239	0.000928058	0.0702	0.00234	0.000908643	0.1803	0.00601	0.00233374	0.318	0.0106	0.00411608	0.001044	3.48e-05	1.35132e-05	0.0002184	7.28e-06	2.82689e-06	0.000657	2.19e-05	8.50397e-06	7.59e-05	2.53e-06	9.82422e-07	2.121e-05	7.07e-07	2.74534e-07	0.2655	0.00885	0.00343653	0.1431	0.00477	0.00185223	3.27e-09	1.09e-10	4.23257e-11	0.00525	0.000175	6.79541e-05	7.23e-12	2.41e-13	9.35825e-14
56203010	Oatmeal, cooked, regular, fat not added in cooking	Grains	Grains	Cooked Cereals	Plant-based, other	234	4.2714	0.046566	0.000199	0.000850008	0.045396	0.000194	0.000828651	0.194688	0.000832	0.0035538	0.233064	0.000996	0.00425431	0.00075348	3.22e-06	1.37539e-05	0.00016848	7.2e-07	3.07541e-06	0.0004446	1.9e-06	8.11566e-06	0.000125892	5.38e-07	2.29801e-06	1.40166e-05	5.99e-08	2.55857e-07	0.37206	0.00159	0.00679152	0.13221	0.000565	0.00241334	2.808e-09	1.2e-11	5.12568e-11	0.0106236	4.54e-05	0.000193922	5.967e-12	2.55e-14	1.08921e-13
56205008	Rice, white, cooked, fat not added in cooking	Grains	Grains	Cooked Grains	Plant-based, other	140	3.10647	0.2044	0.00146	0.00453545	0.11886	0.000849	0.00263739	0.1337	0.000955	0.00296668	0.8162	0.00583	0.0181107	0.003094	2.21e-05	6.8653e-05	0.0003094	2.21e-06	6.8653e-06	0.0004914	3.51e-06	1.09037e-05	0.0001582	1.13e-06	3.51031e-06	1.2278e-05	8.77e-08	2.72438e-07	2.198	0.0157	0.0487716	0.707	0.00505	0.0156877	7.028e-09	5.02e-11	1.55945e-10	0.04326	0.000309	0.0009599	1.0934e-11	7.81e-14	2.42615e-13
63107010	Banana, raw	Fruit	Fruits	Fruits	Plant-based, other	140	9.31942	0.02772	0.000198	0.00184524	0.02646	0.000189	0.00176137	0.011676	8.34e-05	0.000777239	0.2996	0.00214	0.0199435	0.0011298	8.07e-06	7.52077e-05	0.0002352	1.68e-06	1.56566e-05	0.0009954	7.11e-06	6.6261e-05	5.95e-05	4.25e-07	3.96075e-06	3.248e-05	2.32e-07	2.1621e-06	0.2268	0.00162	0.0150975	0.1932	0.00138	0.0128608	2.002e-09	1.43e-11	1.33268e-10	0.0336	0.00024	0.00223666	4.256e-12	3.04e-14	2.8331e-13
75113000	Lettuce, raw	Vegetables	Vegetables	Vegetables, excluding starchy	Plant-based, other	85	10.096	0.030345	0.000357	0.00360428	0.029155	0.000343	0.00346294	0.016745	0.000197	0.00198892	0.26095	0.00307	0.0309948	0.00060605	7.13e-06	7.19847e-05	0.00011475	1.35e-06	1.36296e-05	0.00015215	1.79e-06	1.80719e-05	2.1335e-05	2.51e-07	2.5341e-06	4.4285e-06	5.21e-08	5.26003e-07	0.17	0.002	0.0201921	0.1343	0.00158	0.0159517	2.9325e-09	3.45e-11	3.48313e-10	0.005372	6.32e-05	0.000638069	6.4175e-12	7.55e-14	7.62251e-13
83106000	Italian dressing, made with vinegar and oil	Fats and Oils	Fats and Oils	Oils	Plant-based, other	30	0.776618	0.093	0.0031	0.00240752	0.0918	0.00306	0.00237645	0.1746	0.00582	0.00451992	0.504	0.0168	0.0130472	0.000987	3.29e-05	2.55507e-05	0.0002271	7.57e-06	5.879e-06	0.000564	1.88e-05	1.46004e-05	9.24e-05	3.08e-06	2.39198e-06	1.977e-05	6.59e-07	5.11791e-07	10.56	0.352	0.27337	0.516	0.0172	0.0133578	5.22e-09	1.74e-10	1.35132e-10	0.00693	0.000231	0.000179399	1.248e-11	4.16e-13	3.23073e-13
92552010	Fruit flavored drink, powdered, reconstituted, diet	Beverages, Nonalcoholic	Beverages, Nonalcoholic	Diet Beverages	Other	240	7.76617	0.000312	1.3e-06	1.0096e-05	0.0002976	1.24e-06	9.63005e-06	0.000468	1.95e-06	1.5144e-05	0.003144	1.31e-05	0.000101737	1.8072e-05	7.53e-08	5.84793e-07	9.36e-07	3.9e-09	3.02881e-08	2.0016e-06	8.34e-09	6.47699e-08	4.92e-07	2.05e-09	1.59206e-08	1.3128e-07	5.47e-10	4.24809e-09	0.003192	1.33e-05	0.00010329	0.002712	1.13e-05	8.77577e-05	2.712e-11	1.13e-13	8.77577e-13	3.264e-05	1.36e-07	1.0562e-06	3.36e-14	1.4e-16	1.08726e-15
			Emissions from Diet							0.103512			0.0863014			0.0811184			0.759933			0.00105995			0.000285669			0.000639563			0.000309278			5.02803e-05			0.719813			1.16292			4.96387e-09			0.00688876			1.3529e-11
TABLE 20: EMISSION CALCULATION FOR S8M3
		Characteristics of select foods						Impact Categories
WWEIA Foodcode	Food Description	USDA Main Group	Food subgroup	HENI category	Main ingredient contributing to environmental impacts	RACC (g/serving)	Qty of Diet	Global warming, shorter term (kg CO2 eq/serving)			Global warming, long term (kg CO2 eq/serving)			Land occupation, biodiversity (ha-yr arable/serving)			Fossil energy use (MJ/serving)			Mineral resources use (kg deprived/serving)			Freshwater acidification (kg SO2 eq/serving)			Terrestrial acidification (kg SO2 eq/serving)			Freshwater eutrophication (kg PO4---P- eq/serving)			Marine eutrophication (kg N eq/serving)			Freshwater ecotoxicity (CTUe/serving)			Ionizing radiation (Bq C-14 eq/serving)			Ozone Layer Depletion (kg CFC-11 eq/serving)			Water use (m3/serving)			Photochemical oxidant formation (DALYs/serving)
								HH, EQ			HH, EQ			EQ									EQ			EQ			EQ			EQ			EQ			HH, EQ			HH, EQ						HH
								Mean	Factor	Future Food	Mean	Factor	FF	Mean	Factor	FF	Mean	Factor	FF	Mean	Factor	FF	Mean	Factor	FF	Mean	Factor	FF	Mean	Factor	FF	Mean	Factor	FF	Mean	Factor	FF	Mean	Factor	FF	Mean	Factor	FF	Mean	Factor	FF	Mean	Factor	FF
11111000	Milk, whole	Milk and Dairy	Dairy	Milk	Dairy	244	7.80587	0.62952	0.00258	0.0201391	0.40504	0.00166	0.0129577	0.29768	0.00122	0.00952316	2.03496	0.00834	0.0651009	0.0027328	1.12e-05	8.74257e-05	0.00102724	4.21e-06	3.28627e-05	0.0026596	1.09e-05	8.50839e-05	0.00025376	1.04e-06	8.1181e-06	8.906e-05	3.65e-07	2.84914e-06	1.70312	0.00698	0.0544849	3.172	0.013	0.101476	1.88856e-08	7.74e-11	6.04174e-10	0.0207888	8.52e-05	0.00066506	3.6844e-11	1.51e-13	1.17869e-12
21500100	Ground beef, cooked	Protein Foods	Beef	Red meat	Beef	85	0.437128	3.1705	0.0373	0.0163049	2.227	0.0262	0.0114528	2.227	0.0262	0.0114528	15.13	0.178	0.0778089	0.024225	0.000285	0.000124582	0.0081855	9.63e-05	4.20955e-05	0.02431	0.000286	0.000125019	0.002346	2.76e-05	1.20647e-05	0.0008585	1.01e-05	4.415e-06	9.605	0.113	0.0493955	25.5	0.3	0.131139	1.2665e-07	1.49e-09	6.51321e-10	7.106e-05	8.36e-07	3.65439e-07	2.635e-10	3.1e-12	1.3551e-12
24144210	Chicken, drumstick, fried, no coating, skin eaten, NS as to type of fat added in cooking	Protein Foods	Poultry	Poultry	Poultry	85	1.57678	0.44115	0.00519	0.00818351	0.41395	0.00487	0.00767894	0.73865	0.00869	0.0137023	3.9865	0.0469	0.0739512	0.005406	6.36e-05	0.000100284	0.0016235	1.91e-05	3.01166e-05	0.0048365	5.69e-05	8.97191e-05	0.00069615	8.19e-06	1.29139e-05	0.00016405	1.93e-06	3.04319e-06	2.2015	0.0259	0.0408387	4.352	0.0512	0.0807314	3.74e-08	4.4e-10	6.93785e-10	0.02006	0.000236	0.000372121	5.4655e-11	6.43e-13	1.01387e-12
25221405	Pork sausage	Protein Foods	Processed meat	Cured Meats/Poultry	Processed meat	55	0.312235	0.3905	0.0071	0.00221687	0.2761	0.00502	0.00156742	0.2354	0.00428	0.00133636	4.3615	0.0793	0.0247602	0.0027445	4.99e-05	1.55805e-05	0.0009295	1.69e-05	5.27676e-06	0.0028435	5.17e-05	1.61425e-05	0.0002904	5.28e-06	1.6486e-06	0.0001848	3.36e-06	1.04911e-06	1.408	0.0256	0.00799321	22.605	0.411	0.128328	1.8205e-08	3.31e-10	1.0335e-10	0.0627	0.00114	0.000355947	3.1075e-11	5.65e-13	1.76413e-13
26137120	Salmon, baked or broiled, made with oil	Protein Foods	Seafood	Seafood	Seafood	85	3.90293	0.68255	0.00803	0.0313405	0.66555	0.00783	0.03056	0.3995	0.0047	0.0183438	7.5905	0.0893	0.348532	0.005423	6.38e-05	0.000249007	0.0022015	2.59e-05	0.000101086	0.002856	3.36e-05	0.000131139	0.005474	6.44e-05	0.000251349	0.0006987	8.22e-06	3.20821e-05	2.8475	0.0335	0.130748	9.095	0.107	0.417614	3.1535e-08	3.71e-10	1.44799e-09	0.0034765	4.09e-05	0.00015963	1.496e-10	1.76e-12	6.86916e-12
31103010	Egg, whole, boiled or poached	Protein Foods	Eggs	Eggs	Animal-based (other)	50	1.17088	0.3385	0.00677	0.00792686	0.3325	0.00665	0.00778635	0.37	0.0074	0.00866451	1.775	0.0355	0.0415662	0.00765	0.000153	0.000179145	0.000755	1.51e-05	1.76803e-05	0.00177	3.54e-05	4.14491e-05	0.0002605	5.21e-06	6.10028e-06	5.9e-05	1.18e-06	1.38164e-06	2.425	0.0485	0.0567877	1.97	0.0394	0.0461327	1.9e-08	3.8e-10	4.44934e-10	0.01105	0.000221	0.000258764	3.315e-11	6.63e-13	7.76293e-13
41104020	Pinto, calico, or red Mexican beans, dry, cooked, fat not added in cooking	Protein Foods	Legumes	Legumes and soy products	Plant-based, other	90	4.99575	0.006975	7.75e-05	0.000387171	0.006795	7.55e-05	0.000377179	0.005319	5.91e-05	0.000295249	0.07803	0.000867	0.00433132	0.0003051	3.39e-06	1.69356e-05	3.753e-05	4.17e-07	2.08323e-06	5.76e-05	6.4e-07	3.19728e-06	8.289e-06	9.21e-08	4.60109e-07	2.304e-06	2.56e-08	1.27891e-07	0.03204	0.000356	0.00177849	0.1674	0.00186	0.0092921	3.402e-10	3.78e-12	1.88839e-11	0.005553	6.17e-05	0.000308238	2.781e-12	3.09e-14	1.54369e-13
42111200	Peanuts, dry roasted, salted	Protein Foods	Nuts and seeds	Nuts and seeds	Nuts and seeds	30	0.390293	0.0717	0.00239	0.000932801	0.0702	0.00234	0.000913286	0.1803	0.00601	0.00234566	0.318	0.0106	0.00413711	0.001044	3.48e-05	1.35822e-05	0.0002184	7.28e-06	2.84133e-06	0.000657	2.19e-05	8.54742e-06	7.59e-05	2.53e-06	9.87442e-07	2.121e-05	7.07e-07	2.75937e-07	0.2655	0.00885	0.0034541	0.1431	0.00477	0.0018617	3.27e-09	1.09e-10	4.2542e-11	0.00525	0.000175	6.83013e-05	7.23e-12	2.41e-13	9.40607e-14
56203010	Oatmeal, cooked, regular, fat not added in cooking	Grains	Grains	Cooked Cereals	Plant-based, other	234	4.29323	0.046566	0.000199	0.000854352	0.045396	0.000194	0.000832886	0.194688	0.000832	0.00357196	0.233064	0.000996	0.00427605	0.00075348	3.22e-06	1.38242e-05	0.00016848	7.2e-07	3.09112e-06	0.0004446	1.9e-06	8.15713e-06	0.000125892	5.38e-07	2.30976e-06	1.40166e-05	5.99e-08	2.57164e-07	0.37206	0.00159	0.00682623	0.13221	0.000565	0.00242567	2.808e-09	1.2e-11	5.15187e-11	0.0106236	4.54e-05	0.000194912	5.967e-12	2.55e-14	1.09477e-13
56205008	Rice, white, cooked, fat not added in cooking	Grains	Grains	Cooked Grains	Plant-based, other	140	3.12235	0.2044	0.00146	0.00455863	0.11886	0.000849	0.00265087	0.1337	0.000955	0.00298184	0.8162	0.00583	0.0182033	0.003094	2.21e-05	6.90038e-05	0.0003094	2.21e-06	6.90038e-06	0.0004914	3.51e-06	1.09594e-05	0.0001582	1.13e-06	3.52825e-06	1.2278e-05	8.77e-08	2.7383e-07	2.198	0.0157	0.0490208	0.707	0.00505	0.0157678	7.028e-09	5.02e-11	1.56742e-10	0.04326	0.000309	0.000964805	1.0934e-11	7.81e-14	2.43855e-13
63107010	Banana, raw	Fruit	Fruits	Fruits	Plant-based, other	140	9.36704	0.02772	0.000198	0.00185467	0.02646	0.000189	0.00177037	0.011676	8.34e-05	0.000781211	0.2996	0.00214	0.0200455	0.0011298	8.07e-06	7.5592e-05	0.0002352	1.68e-06	1.57366e-05	0.0009954	7.11e-06	6.65996e-05	5.95e-05	4.25e-07	3.98099e-06	3.248e-05	2.32e-07	2.17315e-06	0.2268	0.00162	0.0151746	0.1932	0.00138	0.0129265	2.002e-09	1.43e-11	1.33949e-10	0.0336	0.00024	0.00224809	4.256e-12	3.04e-14	2.84758e-13
75113000	Lettuce, raw	Vegetables	Vegetables	Vegetables, excluding starchy	Plant-based, other	85	10.1476	0.030345	0.000357	0.0036227	0.029155	0.000343	0.00348064	0.016745	0.000197	0.00199908	0.26095	0.00307	0.0311532	0.00060605	7.13e-06	7.23526e-05	0.00011475	1.35e-06	1.36993e-05	0.00015215	1.79e-06	1.81642e-05	2.1335e-05	2.51e-07	2.54705e-06	4.4285e-06	5.21e-08	5.28691e-07	0.17	0.002	0.0202952	0.1343	0.00158	0.0160332	2.9325e-09	3.45e-11	3.50093e-10	0.005372	6.32e-05	0.00064133	6.4175e-12	7.55e-14	7.66146e-13
83106000	Italian dressing, made with vinegar and oil	Fats and Oils	Fats and Oils	Oils	Plant-based, other	30	0.780587	0.093	0.0031	0.00241982	0.0918	0.00306	0.00238859	0.1746	0.00582	0.00454301	0.504	0.0168	0.0131139	0.000987	3.29e-05	2.56813e-05	0.0002271	7.57e-06	5.90904e-06	0.000564	1.88e-05	1.4675e-05	9.24e-05	3.08e-06	2.40421e-06	1.977e-05	6.59e-07	5.14407e-07	10.56	0.352	0.274766	0.516	0.0172	0.0134261	5.22e-09	1.74e-10	1.35822e-10	0.00693	0.000231	0.000180315	1.248e-11	4.16e-13	3.24724e-13
92552010	Fruit flavored drink, powdered, reconstituted, diet	Beverages, Nonalcoholic	Beverages, Nonalcoholic	Diet Beverages	Other	240	7.80587	0.000312	1.3e-06	1.01476e-05	0.0002976	1.24e-06	9.67927e-06	0.000468	1.95e-06	1.52214e-05	0.003144	1.31e-05	0.000102257	1.8072e-05	7.53e-08	5.87782e-07	9.36e-07	3.9e-09	3.04429e-08	2.0016e-06	8.34e-09	6.51009e-08	4.92e-07	2.05e-09	1.6002e-08	1.3128e-07	5.47e-10	4.26981e-09	0.003192	1.33e-05	0.000103818	0.002712	1.13e-05	8.82063e-05	2.712e-11	1.13e-13	8.82063e-13	3.264e-05	1.36e-07	1.0616e-06	3.36e-14	1.4e-16	1.09282e-15
		Emissions from Diet								0.100752			0.0844267			0.0795561			0.727082			0.00104358			0.000279409			0.000618917			0.000308428			4.89755e-05			0.711668			0.977242			4.83598e-09			0.00641894			1.3348e-11
TABLE 21: EMISSION CALCULATION FOR S9M1
		Characteristics of select foods						Impact Categories
WWEIA Foodcode	Food Description	USDA Main Group	Food subgroup	HENI category	Main ingredient contributing to environmental impacts	RACC (g/serving)	Qty of Diet	Global warming, shorter term (kg CO2 eq/serving)			Global warming, long term (kg CO2 eq/serving)			Land occupation, biodiversity (ha-yr arable/serving)			Fossil energy use (MJ/serving)			Mineral resources use (kg deprived/serving)			Freshwater acidification (kg SO2 eq/serving)			Terrestrial acidification (kg SO2 eq/serving)			Freshwater eutrophication (kg PO4---P- eq/serving)			Marine eutrophication (kg N eq/serving)			Freshwater ecotoxicity (CTUe/serving)			Ionizing radiation (Bq C-14 eq/serving)			Ozone Layer Depletion (kg CFC-11 eq/serving)			Water use (m3/serving)			Photochemical oxidant formation (DALYs/serving)
								HH, EQ			HH, EQ			EQ									EQ			EQ			EQ			EQ			EQ			HH, EQ			HH, EQ						HH
								Mean	Factor	Future Food	Mean	Factor	FF	Mean	Factor	FF	Mean	Factor	FF	Mean	Factor	FF	Mean	Factor	FF	Mean	Factor	FF	Mean	Factor	FF	Mean	Factor	FF	Mean	Factor	FF	Mean	Factor	FF	Mean	Factor	FF	Mean	Factor	FF	Mean	Factor	FF
11111000	Milk, whole	Milk and Dairy	Dairy	Milk	Dairy	244	7.85267	0.62952	0.00258	0.0202599	0.40504	0.00166	0.0130354	0.29768	0.00122	0.00958025	2.03496	0.00834	0.0654912	0.0027328	1.12e-05	8.79499e-05	0.00102724	4.21e-06	3.30597e-05	0.0026596	1.09e-05	8.55941e-05	0.00025376	1.04e-06	8.16677e-06	8.906e-05	3.65e-07	2.86622e-06	1.70312	0.00698	0.0548116	3.172	0.013	0.102085	1.88856e-08	7.74e-11	6.07796e-10	0.0207888	8.52e-05	0.000669047	3.6844e-11	1.51e-13	1.18575e-12
21500100	Ground beef, cooked	Protein Foods	Beef	Red meat	Beef	85	0.0628213	3.1705	0.0373	0.00234324	2.227	0.0262	0.00164592	2.227	0.0262	0.00164592	15.13	0.178	0.0111822	0.024225	0.000285	1.79041e-05	0.0081855	9.63e-05	6.04969e-06	0.02431	0.000286	1.79669e-05	0.002346	2.76e-05	1.73387e-06	0.0008585	1.01e-05	6.34495e-07	9.605	0.113	0.00709881	25.5	0.3	0.0188464	1.2665e-07	1.49e-09	9.36038e-11	7.106e-05	8.36e-07	5.25186e-08	2.635e-10	3.1e-12	1.94746e-13
24144210	Chicken, drumstick, fried, no coating, skin eaten, NS as to type of fat added in cooking	Protein Foods	Poultry	Poultry	Poultry	85	1.99131	0.44115	0.00519	0.0103349	0.41395	0.00487	0.0096977	0.73865	0.00869	0.0173045	3.9865	0.0469	0.0933927	0.005406	6.36e-05	0.000126648	0.0016235	1.91e-05	3.80341e-05	0.0048365	5.69e-05	0.000113306	0.00069615	8.19e-06	1.63089e-05	0.00016405	1.93e-06	3.84324e-06	2.2015	0.0259	0.0515751	4.352	0.0512	0.101955	3.74e-08	4.4e-10	8.76178e-10	0.02006	0.000236	0.00046995	5.4655e-11	6.43e-13	1.28042e-12
25221405	Pork sausage	Protein Foods	Processed meat	Cured Meats/Poultry	Processed meat	55	0.785267	0.3905	0.0071	0.00557539	0.2761	0.00502	0.00394204	0.2354	0.00428	0.00336094	4.3615	0.0793	0.0622716	0.0027445	4.99e-05	3.91848e-05	0.0009295	1.69e-05	1.3271e-05	0.0028435	5.17e-05	4.05983e-05	0.0002904	5.28e-06	4.14621e-06	0.0001848	3.36e-06	2.6385e-06	1.408	0.0256	0.0201028	22.605	0.411	0.322745	1.8205e-08	3.31e-10	2.59923e-10	0.0627	0.00114	0.000895204	3.1075e-11	5.65e-13	4.43676e-13
26137120	Salmon, baked or broiled, made with oil	Protein Foods	Seafood	Seafood	Seafood	85	3.92633	0.68255	0.00803	0.0315285	0.66555	0.00783	0.0307432	0.3995	0.0047	0.0184538	7.5905	0.0893	0.350622	0.005423	6.38e-05	0.0002505	0.0022015	2.59e-05	0.000101692	0.002856	3.36e-05	0.000131925	0.005474	6.44e-05	0.000252856	0.0006987	8.22e-06	3.22745e-05	2.8475	0.0335	0.131532	9.095	0.107	0.420118	3.1535e-08	3.71e-10	1.45667e-09	0.0034765	4.09e-05	0.000160587	1.496e-10	1.76e-12	6.91035e-12
31103010	Egg, whole, boiled or poached	Protein Foods	Eggs	Eggs	Animal-based (other)	50	1.1779	0.3385	0.00677	0.00797439	0.3325	0.00665	0.00783304	0.37	0.0074	0.00871647	1.775	0.0355	0.0418155	0.00765	0.000153	0.000180219	0.000755	1.51e-05	1.77863e-05	0.00177	3.54e-05	4.16977e-05	0.0002605	5.21e-06	6.13686e-06	5.9e-05	1.18e-06	1.38992e-06	2.425	0.0485	0.0571282	1.97	0.0394	0.0464093	1.9e-08	3.8e-10	4.47602e-10	0.01105	0.000221	0.000260316	3.315e-11	6.63e-13	7.80948e-13
41104020	Pinto, calico, or red Mexican beans, dry, cooked, fat not added in cooking	Protein Foods	Legumes	Legumes and soy products	Plant-based, other	90	4.64878	0.006975	7.75e-05	0.00036028	0.006795	7.55e-05	0.000350983	0.005319	5.91e-05	0.000274743	0.07803	0.000867	0.00403049	0.0003051	3.39e-06	1.57594e-05	3.753e-05	4.17e-07	1.93854e-06	5.76e-05	6.4e-07	2.97522e-06	8.289e-06	9.21e-08	4.28153e-07	2.304e-06	2.56e-08	1.19009e-07	0.03204	0.000356	0.00165497	0.1674	0.00186	0.00864673	3.402e-10	3.78e-12	1.75724e-11	0.005553	6.17e-05	0.00028683	2.781e-12	3.09e-14	1.43647e-13
42111200	Peanuts, dry roasted, salted	Protein Foods	Nuts and seeds	Nuts and seeds	Nuts and seeds	30	0.392633	0.0717	0.00239	0.000938394	0.0702	0.00234	0.000918762	0.1803	0.00601	0.00235973	0.318	0.0106	0.00416191	0.001044	3.48e-05	1.36636e-05	0.0002184	7.28e-06	2.85837e-06	0.000657	2.19e-05	8.59867e-06	7.59e-05	2.53e-06	9.93362e-07	2.121e-05	7.07e-07	2.77592e-07	0.2655	0.00885	0.0034748	0.1431	0.00477	0.00187286	3.27e-09	1.09e-10	4.2797e-11	0.00525	0.000175	6.87108e-05	7.23e-12	2.41e-13	9.46246e-14
56203010	Oatmeal, cooked, regular, fat not added in cooking	Grains	Grains	Cooked Cereals	Plant-based, other	234	4.31897	0.046566	0.000199	0.000859474	0.045396	0.000194	0.00083788	0.194688	0.000832	0.00359338	0.233064	0.000996	0.00430169	0.00075348	3.22e-06	1.39071e-05	0.00016848	7.2e-07	3.10966e-06	0.0004446	1.9e-06	8.20604e-06	0.000125892	5.38e-07	2.3236e-06	1.40166e-05	5.99e-08	2.58706e-07	0.37206	0.00159	0.00686716	0.13221	0.000565	0.00244022	2.808e-09	1.2e-11	5.18276e-11	0.0106236	4.54e-05	0.000196081	5.967e-12	2.55e-14	1.10134e-13
56205008	Rice, white, cooked, fat not added in cooking	Grains	Grains	Cooked Grains	Plant-based, other	140	3.14107	0.2044	0.00146	0.00458596	0.11886	0.000849	0.00266677	0.1337	0.000955	0.00299972	0.8162	0.00583	0.0183124	0.003094	2.21e-05	6.94176e-05	0.0003094	2.21e-06	6.94176e-06	0.0004914	3.51e-06	1.10251e-05	0.0001582	1.13e-06	3.54941e-06	1.2278e-05	8.77e-08	2.75472e-07	2.198	0.0157	0.0493147	0.707	0.00505	0.0158624	7.028e-09	5.02e-11	1.57682e-10	0.04326	0.000309	0.00097059	1.0934e-11	7.81e-14	2.45317e-13
63107010	Banana, raw	Fruit	Fruits	Fruits	Plant-based, other	140	9.4232	0.02772	0.000198	0.00186579	0.02646	0.000189	0.00178098	0.011676	8.34e-05	0.000785895	0.2996	0.00214	0.0201656	0.0011298	8.07e-06	7.60452e-05	0.0002352	1.68e-06	1.5831e-05	0.0009954	7.11e-06	6.69989e-05	5.95e-05	4.25e-07	4.00486e-06	3.248e-05	2.32e-07	2.18618e-06	0.2268	0.00162	0.0152656	0.1932	0.00138	0.013004	2.002e-09	1.43e-11	1.34752e-10	0.0336	0.00024	0.00226157	4.256e-12	3.04e-14	2.86465e-13
75113000	Lettuce, raw	Vegetables	Vegetables	Vegetables, excluding starchy	Plant-based, other	85	10.2085	0.030345	0.000357	0.00364442	0.029155	0.000343	0.0035015	0.016745	0.000197	0.00201107	0.26095	0.00307	0.03134	0.00060605	7.13e-06	7.27864e-05	0.00011475	1.35e-06	1.37814e-05	0.00015215	1.79e-06	1.82732e-05	2.1335e-05	2.51e-07	2.56233e-06	4.4285e-06	5.21e-08	5.31861e-07	0.17	0.002	0.0204169	0.1343	0.00158	0.0161294	2.9325e-09	3.45e-11	3.52192e-10	0.005372	6.32e-05	0.000645175	6.4175e-12	7.55e-14	7.70739e-13
83106000	Italian dressing, made with vinegar and oil	Fats and Oils	Fats and Oils	Oils	Plant-based, other	30	0.785267	0.093	0.0031	0.00243433	0.0918	0.00306	0.00240292	0.1746	0.00582	0.00457025	0.504	0.0168	0.0131925	0.000987	3.29e-05	2.58353e-05	0.0002271	7.57e-06	5.94447e-06	0.000564	1.88e-05	1.4763e-05	9.24e-05	3.08e-06	2.41862e-06	1.977e-05	6.59e-07	5.17491e-07	10.56	0.352	0.276414	0.516	0.0172	0.0135066	5.22e-09	1.74e-10	1.36636e-10	0.00693	0.000231	0.000181397	1.248e-11	4.16e-13	3.26671e-13
92552010	Fruit flavored drink, powdered, reconstituted, diet	Beverages, Nonalcoholic	Beverages, Nonalcoholic	Diet Beverages	Other	240	7.85267	0.000312	1.3e-06	1.02085e-05	0.0002976	1.24e-06	9.73731e-06	0.000468	1.95e-06	1.53127e-05	0.003144	1.31e-05	0.00010287	1.8072e-05	7.53e-08	5.91306e-07	9.36e-07	3.9e-09	3.06254e-08	2.0016e-06	8.34e-09	6.54913e-08	4.92e-07	2.05e-09	1.6098e-08	1.3128e-07	5.47e-10	4.29541e-09	0.003192	1.33e-05	0.000104441	0.002712	1.13e-05	8.87352e-05	2.712e-11	1.13e-13	8.87352e-13	3.264e-05	1.36e-07	1.06796e-06	3.36e-14	1.4e-16	1.09937e-15
		Emissions from Diet								0.0927151			0.0793668			0.075672			0.720382			0.000990411			0.000260329			0.000561993			0.000305645			4.78174e-05			0.695761			1.08371			4.63612e-09			0.00706658			1.27746e-11
TABLE 22: EMISSION CALCULATION FOR S9M2
		Characteristics of select foods						Impact Categories
WWEIA Foodcode	Food Description	USDA Main Group	Food subgroup	HENI category	Main ingredient contributing to environmental impacts	RACC (g/serving)	Qty of Diet	Global warming, shorter term (kg CO2 eq/serving)			Global warming, long term (kg CO2 eq/serving)			Land occupation, biodiversity (ha-yr arable/serving)			Fossil energy use (MJ/serving)			Mineral resources use (kg deprived/serving)			Freshwater acidification (kg SO2 eq/serving)			Terrestrial acidification (kg SO2 eq/serving)			Freshwater eutrophication (kg PO4---P- eq/serving)			Marine eutrophication (kg N eq/serving)			Freshwater ecotoxicity (CTUe/serving)			Ionizing radiation (Bq C-14 eq/serving)			Ozone Layer Depletion (kg CFC-11 eq/serving)			Water use (m3/serving)			Photochemical oxidant formation (DALYs/serving)
								HH, EQ			HH, EQ			EQ									EQ			EQ			EQ			EQ			EQ			HH, EQ			HH, EQ						HH
								Mean	Factor	Future Food	Mean	Factor	FF	Mean	Factor	FF	Mean	Factor	FF	Mean	Factor	FF	Mean	Factor	FF	Mean	Factor	FF	Mean	Factor	FF	Mean	Factor	FF	Mean	Factor	FF	Mean	Factor	FF	Mean	Factor	FF	Mean	Factor	FF	Mean	Factor	FF
11111000	Milk, whole	Milk and Dairy	Dairy	Milk	Dairy	244	7.75875	0.62952	0.00258	0.0200176	0.40504	0.00166	0.0128795	0.29768	0.00122	0.00946567	2.03496	0.00834	0.0647079	0.0027328	1.12e-05	8.6898e-05	0.00102724	4.21e-06	3.26643e-05	0.0026596	1.09e-05	8.45703e-05	0.00025376	1.04e-06	8.0691e-06	8.906e-05	3.65e-07	2.83194e-06	1.70312	0.00698	0.0541561	3.172	0.013	0.100864	1.88856e-08	7.74e-11	6.00527e-10	0.0207888	8.52e-05	0.000661045	3.6844e-11	1.51e-13	1.17157e-12
21500100	Ground beef, cooked	Protein Foods	Beef	Red meat	Beef	85	0.06207	3.1705	0.0373	0.00231521	2.227	0.0262	0.00162623	2.227	0.0262	0.00162623	15.13	0.178	0.0110485	0.024225	0.000285	1.76899e-05	0.0081855	9.63e-05	5.97734e-06	0.02431	0.000286	1.7752e-05	0.002346	2.76e-05	1.71313e-06	0.0008585	1.01e-05	6.26907e-07	9.605	0.113	0.00701391	25.5	0.3	0.018621	1.2665e-07	1.49e-09	9.24843e-11	7.106e-05	8.36e-07	5.18905e-08	2.635e-10	3.1e-12	1.92417e-13
24144210	Chicken, drumstick, fried, no coating, skin eaten, NS as to type of fat added in cooking	Protein Foods	Poultry	Poultry	Poultry	85	1.56727	0.44115	0.00519	0.00813411	0.41395	0.00487	0.00763259	0.73865	0.00869	0.0136195	3.9865	0.0469	0.0735048	0.005406	6.36e-05	9.96782e-05	0.0016235	1.91e-05	2.99348e-05	0.0048365	5.69e-05	8.91775e-05	0.00069615	8.19e-06	1.28359e-05	0.00016405	1.93e-06	3.02482e-06	2.2015	0.0259	0.0405922	4.352	0.0512	0.0802441	3.74e-08	4.4e-10	6.89597e-10	0.02006	0.000236	0.000369875	5.4655e-11	6.43e-13	1.00775e-12
25221405	Pork sausage	Protein Foods	Processed meat	Cured Meats/Poultry	Processed meat	55	0.775875	0.3905	0.0071	0.00550871	0.2761	0.00502	0.00389489	0.2354	0.00428	0.00332074	4.3615	0.0793	0.0615269	0.0027445	4.99e-05	3.87161e-05	0.0009295	1.69e-05	1.31123e-05	0.0028435	5.17e-05	4.01127e-05	0.0002904	5.28e-06	4.09662e-06	0.0001848	3.36e-06	2.60694e-06	1.408	0.0256	0.0198624	22.605	0.411	0.318884	1.8205e-08	3.31e-10	2.56815e-10	0.0627	0.00114	0.000884497	3.1075e-11	5.65e-13	4.38369e-13
26137120	Salmon, baked or broiled, made with oil	Protein Foods	Seafood	Seafood	Seafood	85	3.87937	0.68255	0.00803	0.0311514	0.66555	0.00783	0.0303755	0.3995	0.0047	0.0182331	7.5905	0.0893	0.346428	0.005423	6.38e-05	0.000247504	0.0022015	2.59e-05	0.000100476	0.002856	3.36e-05	0.000130347	0.005474	6.44e-05	0.000249832	0.0006987	8.22e-06	3.18884e-05	2.8475	0.0335	0.129959	9.095	0.107	0.415093	3.1535e-08	3.71e-10	1.43925e-09	0.0034765	4.09e-05	0.000158666	1.496e-10	1.76e-12	6.8277e-12
31103010	Egg, whole, boiled or poached	Protein Foods	Eggs	Eggs	Animal-based (other)	50	1.16381	0.3385	0.00677	0.00787901	0.3325	0.00665	0.00773935	0.37	0.0074	0.00861221	1.775	0.0355	0.0413153	0.00765	0.000153	0.000178063	0.000755	1.51e-05	1.75736e-05	0.00177	3.54e-05	4.11989e-05	0.0002605	5.21e-06	6.06346e-06	5.9e-05	1.18e-06	1.3733e-06	2.425	0.0485	0.0564449	1.97	0.0394	0.0458542	1.9e-08	3.8e-10	4.42249e-10	0.01105	0.000221	0.000257202	3.315e-11	6.63e-13	7.71607e-13
41104020	Pinto, calico, or red Mexican beans, dry, cooked, fat not added in cooking	Protein Foods	Legumes	Legumes and soy products	Plant-based, other	90	4.9656	0.006975	7.75e-05	0.000384834	0.006795	7.55e-05	0.000374903	0.005319	5.91e-05	0.000293467	0.07803	0.000867	0.00430517	0.0003051	3.39e-06	1.68334e-05	3.753e-05	4.17e-07	2.07065e-06	5.76e-05	6.4e-07	3.17798e-06	8.289e-06	9.21e-08	4.57332e-07	2.304e-06	2.56e-08	1.27119e-07	0.03204	0.000356	0.00176775	0.1674	0.00186	0.00923601	3.402e-10	3.78e-12	1.877e-11	0.005553	6.17e-05	0.000306377	2.781e-12	3.09e-14	1.53437e-13
42111200	Peanuts, dry roasted, salted	Protein Foods	Nuts and seeds	Nuts and seeds	Nuts and seeds	30	0.387937	0.0717	0.00239	0.00092717	0.0702	0.00234	0.000907773	0.1803	0.00601	0.0023315	0.318	0.0106	0.00411214	0.001044	3.48e-05	1.35002e-05	0.0002184	7.28e-06	2.82418e-06	0.000657	2.19e-05	8.49583e-06	7.59e-05	2.53e-06	9.81481e-07	2.121e-05	7.07e-07	2.74272e-07	0.2655	0.00885	0.00343325	0.1431	0.00477	0.00185046	3.27e-09	1.09e-10	4.22852e-11	0.00525	0.000175	6.7889e-05	7.23e-12	2.41e-13	9.34929e-14
56203010	Oatmeal, cooked, regular, fat not added in cooking	Grains	Grains	Cooked Cereals	Plant-based, other	234	4.26731	0.046566	0.000199	0.000849195	0.045396	0.000194	0.000827858	0.194688	0.000832	0.0035504	0.233064	0.000996	0.00425024	0.00075348	3.22e-06	1.37407e-05	0.00016848	7.2e-07	3.07246e-06	0.0004446	1.9e-06	8.10789e-06	0.000125892	5.38e-07	2.29581e-06	1.40166e-05	5.99e-08	2.55612e-07	0.37206	0.00159	0.00678502	0.13221	0.000565	0.00241103	2.808e-09	1.2e-11	5.12077e-11	0.0106236	4.54e-05	0.000193736	5.967e-12	2.55e-14	1.08816e-13
56205008	Rice, white, cooked, fat not added in cooking	Grains	Grains	Cooked Grains	Plant-based, other	140	3.1035	0.2044	0.00146	0.00453111	0.11886	0.000849	0.00263487	0.1337	0.000955	0.00296384	0.8162	0.00583	0.0180934	0.003094	2.21e-05	6.85873e-05	0.0003094	2.21e-06	6.85873e-06	0.0004914	3.51e-06	1.08933e-05	0.0001582	1.13e-06	3.50695e-06	1.2278e-05	8.77e-08	2.72177e-07	2.198	0.0157	0.0487249	0.707	0.00505	0.0156727	7.028e-09	5.02e-11	1.55796e-10	0.04326	0.000309	0.000958981	1.0934e-11	7.81e-14	2.42383e-13
63107010	Banana, raw	Fruit	Fruits	Fruits	Plant-based, other	140	9.3105	0.02772	0.000198	0.00184348	0.02646	0.000189	0.00175968	0.011676	8.34e-05	0.000776495	0.2996	0.00214	0.0199245	0.0011298	8.07e-06	7.51357e-05	0.0002352	1.68e-06	1.56416e-05	0.0009954	7.11e-06	6.61976e-05	5.95e-05	4.25e-07	3.95696e-06	3.248e-05	2.32e-07	2.16004e-06	0.2268	0.00162	0.015083	0.1932	0.00138	0.0128485	2.002e-09	1.43e-11	1.3314e-10	0.0336	0.00024	0.00223452	4.256e-12	3.04e-14	2.83039e-13
75113000	Lettuce, raw	Vegetables	Vegetables	Vegetables, excluding starchy	Plant-based, other	85	10.0864	0.030345	0.000357	0.00360083	0.029155	0.000343	0.00345963	0.016745	0.000197	0.00198701	0.26095	0.00307	0.0309652	0.00060605	7.13e-06	7.19158e-05	0.00011475	1.35e-06	1.36166e-05	0.00015215	1.79e-06	1.80546e-05	2.1335e-05	2.51e-07	2.53168e-06	4.4285e-06	5.21e-08	5.255e-07	0.17	0.002	0.0201727	0.1343	0.00158	0.0159365	2.9325e-09	3.45e-11	3.4798e-10	0.005372	6.32e-05	0.000637459	6.4175e-12	7.55e-14	7.61521e-13
83106000	Italian dressing, made with vinegar and oil	Fats and Oils	Fats and Oils	Oils	Plant-based, other	30	0.775875	0.093	0.0031	0.00240521	0.0918	0.00306	0.00237418	0.1746	0.00582	0.00451559	0.504	0.0168	0.0130347	0.000987	3.29e-05	2.55263e-05	0.0002271	7.57e-06	5.87337e-06	0.000564	1.88e-05	1.45864e-05	9.24e-05	3.08e-06	2.38969e-06	1.977e-05	6.59e-07	5.11301e-07	10.56	0.352	0.273108	0.516	0.0172	0.013345	5.22e-09	1.74e-10	1.35002e-10	0.00693	0.000231	0.000179227	1.248e-11	4.16e-13	3.22764e-13
92552010	Fruit flavored drink, powdered, reconstituted, diet	Beverages, Nonalcoholic	Beverages, Nonalcoholic	Diet Beverages	Other	240	7.75875	0.000312	1.3e-06	1.00864e-05	0.0002976	1.24e-06	9.62085e-06	0.000468	1.95e-06	1.51296e-05	0.003144	1.31e-05	0.00010164	1.8072e-05	7.53e-08	5.84234e-07	9.36e-07	3.9e-09	3.02591e-08	2.0016e-06	8.34e-09	6.47079e-08	4.92e-07	2.05e-09	1.59054e-08	1.3128e-07	5.47e-10	4.24403e-09	0.003192	1.33e-05	0.000103191	0.002712	1.13e-05	8.76738e-05	2.712e-11	1.13e-13	8.76738e-13	3.264e-05	1.36e-07	1.05519e-06	3.36e-14	1.4e-16	1.08622e-15
				Emissions from Diet						0.0895579			0.0764966			0.0713109			0.693318			0.000954373			0.000249726			0.000532737			0.000298746			4.64826e-05			0.677206			1.05095			4.40598e-09			0.00691058			1.2376e-11
TABLE 23: EMISSION CALCULATION FOR S9M3
		Characteristics of select foods						Impact Categories
WWEIA Foodcode	Food Description	USDA Main Group	Food subgroup	HENI category	Main ingredient contributing to environmental impacts	RACC (g/serving)	Qty of Diet	Global warming, shorter term (kg CO2 eq/serving)			Global warming, long term (kg CO2 eq/serving)			Land occupation, biodiversity (ha-yr arable/serving)			Fossil energy use (MJ/serving)			Mineral resources use (kg deprived/serving)			Freshwater acidification (kg SO2 eq/serving)			Terrestrial acidification (kg SO2 eq/serving)			Freshwater eutrophication (kg PO4---P- eq/serving)			Marine eutrophication (kg N eq/serving)			Freshwater ecotoxicity (CTUe/serving)			Ionizing radiation (Bq C-14 eq/serving)			Ozone Layer Depletion (kg CFC-11 eq/serving)			Water use (m3/serving)			Photochemical oxidant formation (DALYs/serving)
								HH, EQ			HH, EQ			EQ									EQ			EQ			EQ			EQ			EQ			HH, EQ			HH, EQ						HH
								Mean	Factor	Future Food	Mean	Factor	FF	Mean	Factor	FF	Mean	Factor	FF	Mean	Factor	FF	Mean	Factor	FF	Mean	Factor	FF	Mean	Factor	FF	Mean	Factor	FF	Mean	Factor	FF	Mean	Factor	FF	Mean	Factor	FF	Mean	Factor	FF	Mean	Factor	FF
11111000	Milk, whole	Milk and Dairy	Dairy	Milk	Dairy	244	7.72447	0.62952	0.00258	0.0199291	0.40504	0.00166	0.0128226	0.29768	0.00122	0.00942385	2.03496	0.00834	0.064422	0.0027328	1.12e-05	8.6514e-05	0.00102724	4.21e-06	3.252e-05	0.0026596	1.09e-05	8.41967e-05	0.00025376	1.04e-06	8.03344e-06	8.906e-05	3.65e-07	2.81943e-06	1.70312	0.00698	0.0539168	3.172	0.013	0.100418	1.88856e-08	7.74e-11	5.97874e-10	0.0207888	8.52e-05	0.000658124	3.6844e-11	1.51e-13	1.16639e-12
21500100	Ground beef, cooked	Protein Foods	Beef	Red meat	Beef	85	0.0617957	3.1705	0.0373	0.00230498	2.227	0.0262	0.00161905	2.227	0.0262	0.00161905	15.13	0.178	0.0109996	0.024225	0.000285	1.76118e-05	0.0081855	9.63e-05	5.95093e-06	0.02431	0.000286	1.76736e-05	0.002346	2.76e-05	1.70556e-06	0.0008585	1.01e-05	6.24137e-07	9.605	0.113	0.00698292	25.5	0.3	0.0185387	1.2665e-07	1.49e-09	9.20756e-11	7.106e-05	8.36e-07	5.16612e-08	2.635e-10	3.1e-12	1.91567e-13
24144210	Chicken, drumstick, fried, no coating, skin eaten, NS as to type of fat added in cooking	Protein Foods	Poultry	Poultry	Poultry	85	1.56034	0.44115	0.00519	0.00809817	0.41395	0.00487	0.00759887	0.73865	0.00869	0.0135594	3.9865	0.0469	0.07318	0.005406	6.36e-05	9.92377e-05	0.0016235	1.91e-05	2.98025e-05	0.0048365	5.69e-05	8.87835e-05	0.00069615	8.19e-06	1.27792e-05	0.00016405	1.93e-06	3.01146e-06	2.2015	0.0259	0.0404129	4.352	0.0512	0.0798895	3.74e-08	4.4e-10	6.8655e-10	0.02006	0.000236	0.000368241	5.4655e-11	6.43e-13	1.0033e-12
25221405	Pork sausage	Protein Foods	Processed meat	Cured Meats/Poultry	Processed meat	55	0.154489	0.3905	0.0071	0.00109687	0.2761	0.00502	0.000775536	0.2354	0.00428	0.000661214	4.3615	0.0793	0.012251	0.0027445	4.99e-05	7.70902e-06	0.0009295	1.69e-05	2.61087e-06	0.0028435	5.17e-05	7.9871e-06	0.0002904	5.28e-06	8.15704e-07	0.0001848	3.36e-06	5.19084e-07	1.408	0.0256	0.00395493	22.605	0.411	0.0634951	1.8205e-08	3.31e-10	5.1136e-11	0.0627	0.00114	0.000176118	3.1075e-11	5.65e-13	8.72865e-14
26137120	Salmon, baked or broiled, made with oil	Protein Foods	Seafood	Seafood	Seafood	85	3.86223	0.68255	0.00803	0.0310137	0.66555	0.00783	0.0302413	0.3995	0.0047	0.0181525	7.5905	0.0893	0.344897	0.005423	6.38e-05	0.00024641	0.0022015	2.59e-05	0.000100032	0.002856	3.36e-05	0.000129771	0.005474	6.44e-05	0.000248728	0.0006987	8.22e-06	3.17476e-05	2.8475	0.0335	0.129385	9.095	0.107	0.413259	3.1535e-08	3.71e-10	1.43289e-09	0.0034765	4.09e-05	0.000157965	1.496e-10	1.76e-12	6.79753e-12
31103010	Egg, whole, boiled or poached	Protein Foods	Eggs	Eggs	Animal-based (other)	50	1.15867	0.3385	0.00677	0.00784419	0.3325	0.00665	0.00770515	0.37	0.0074	0.00857416	1.775	0.0355	0.0411328	0.00765	0.000153	0.000177276	0.000755	1.51e-05	1.74959e-05	0.00177	3.54e-05	4.10169e-05	0.0002605	5.21e-06	6.03667e-06	5.9e-05	1.18e-06	1.36723e-06	2.425	0.0485	0.0561955	1.97	0.0394	0.0456516	1.9e-08	3.8e-10	4.40295e-10	0.01105	0.000221	0.000256066	3.315e-11	6.63e-13	7.68198e-13
41104020	Pinto, calico, or red Mexican beans, dry, cooked, fat not added in cooking	Protein Foods	Legumes	Legumes and soy products	Plant-based, other	90	5.56161	0.006975	7.75e-05	0.000431025	0.006795	7.55e-05	0.000419902	0.005319	5.91e-05	0.000328691	0.07803	0.000867	0.00482192	0.0003051	3.39e-06	1.88539e-05	3.753e-05	4.17e-07	2.31919e-06	5.76e-05	6.4e-07	3.55943e-06	8.289e-06	9.21e-08	5.12225e-07	2.304e-06	2.56e-08	1.42377e-07	0.03204	0.000356	0.00197993	0.1674	0.00186	0.0103446	3.402e-10	3.78e-12	2.10229e-11	0.005553	6.17e-05	0.000343152	2.781e-12	3.09e-14	1.71854e-13
42111200	Peanuts, dry roasted, salted	Protein Foods	Nuts and seeds	Nuts and seeds	Nuts and seeds	30	0.386223	0.0717	0.00239	0.000923074	0.0702	0.00234	0.000903762	0.1803	0.00601	0.0023212	0.318	0.0106	0.00409397	0.001044	3.48e-05	1.34406e-05	0.0002184	7.28e-06	2.81171e-06	0.000657	2.19e-05	8.45829e-06	7.59e-05	2.53e-06	9.77145e-07	2.121e-05	7.07e-07	2.7306e-07	0.2655	0.00885	0.00341808	0.1431	0.00477	0.00184228	3.27e-09	1.09e-10	4.20983e-11	0.00525	0.000175	6.75891e-05	7.23e-12	2.41e-13	9.30798e-14
56203010	Oatmeal, cooked, regular, fat not added in cooking	Grains	Grains	Cooked Cereals	Plant-based, other	234	4.24846	0.046566	0.000199	0.000845443	0.045396	0.000194	0.0008242	0.194688	0.000832	0.00353472	0.233064	0.000996	0.00423146	0.00075348	3.22e-06	1.368e-05	0.00016848	7.2e-07	3.05889e-06	0.0004446	1.9e-06	8.07207e-06	0.000125892	5.38e-07	2.28567e-06	1.40166e-05	5.99e-08	2.54483e-07	0.37206	0.00159	0.00675504	0.13221	0.000565	0.00240038	2.808e-09	1.2e-11	5.09815e-11	0.0106236	4.54e-05	0.00019288	5.967e-12	2.55e-14	1.08336e-13
56205008	Rice, white, cooked, fat not added in cooking	Grains	Grains	Cooked Grains	Plant-based, other	140	3.08979	0.2044	0.00146	0.00451109	0.11886	0.000849	0.00262323	0.1337	0.000955	0.00295075	0.8162	0.00583	0.0180135	0.003094	2.21e-05	6.82843e-05	0.0003094	2.21e-06	6.82843e-06	0.0004914	3.51e-06	1.08451e-05	0.0001582	1.13e-06	3.49146e-06	1.2278e-05	8.77e-08	2.70974e-07	2.198	0.0157	0.0485096	0.707	0.00505	0.0156034	7.028e-09	5.02e-11	1.55107e-10	0.04326	0.000309	0.000954744	1.0934e-11	7.81e-14	2.41312e-13
63107010	Banana, raw	Fruit	Fruits	Fruits	Plant-based, other	140	9.26936	0.02772	0.000198	0.00183533	0.02646	0.000189	0.00175191	0.011676	8.34e-05	0.000773064	0.2996	0.00214	0.0198364	0.0011298	8.07e-06	7.48037e-05	0.0002352	1.68e-06	1.55725e-05	0.0009954	7.11e-06	6.59051e-05	5.95e-05	4.25e-07	3.93948e-06	3.248e-05	2.32e-07	2.15049e-06	0.2268	0.00162	0.0150164	0.1932	0.00138	0.0127917	2.002e-09	1.43e-11	1.32552e-10	0.0336	0.00024	0.00222465	4.256e-12	3.04e-14	2.81788e-13
75113000	Lettuce, raw	Vegetables	Vegetables	Vegetables, excluding starchy	Plant-based, other	85	10.0418	0.030345	0.000357	0.00358492	0.029155	0.000343	0.00344434	0.016745	0.000197	0.00197824	0.26095	0.00307	0.0308283	0.00060605	7.13e-06	7.15981e-05	0.00011475	1.35e-06	1.35564e-05	0.00015215	1.79e-06	1.79748e-05	2.1335e-05	2.51e-07	2.52049e-06	4.4285e-06	5.21e-08	5.23178e-07	0.17	0.002	0.0200836	0.1343	0.00158	0.0158661	2.9325e-09	3.45e-11	3.46442e-10	0.005372	6.32e-05	0.000634642	6.4175e-12	7.55e-14	7.58156e-13
83106000	Italian dressing, made with vinegar and oil	Fats and Oils	Fats and Oils	Oils	Plant-based, other	30	0.772447	0.093	0.0031	0.00239458	0.0918	0.00306	0.00236369	0.1746	0.00582	0.00449564	0.504	0.0168	0.0129771	0.000987	3.29e-05	2.54135e-05	0.0002271	7.57e-06	5.84742e-06	0.000564	1.88e-05	1.4522e-05	9.24e-05	3.08e-06	2.37914e-06	1.977e-05	6.59e-07	5.09042e-07	10.56	0.352	0.271901	0.516	0.0172	0.0132861	5.22e-09	1.74e-10	1.34406e-10	0.00693	0.000231	0.000178435	1.248e-11	4.16e-13	3.21338e-13
92552010	Fruit flavored drink, powdered, reconstituted, diet	Beverages, Nonalcoholic	Beverages, Nonalcoholic	Diet Beverages	Other	240	7.72447	0.000312	1.3e-06	1.00418e-05	0.0002976	1.24e-06	9.57834e-06	0.000468	1.95e-06	1.50627e-05	0.003144	1.31e-05	0.00010119	1.8072e-05	7.53e-08	5.81652e-07	9.36e-07	3.9e-09	3.01254e-08	2.0016e-06	8.34e-09	6.4422e-08	4.92e-07	2.05e-09	1.58352e-08	1.3128e-07	5.47e-10	4.22528e-09	0.003192	1.33e-05	0.000102735	0.002712	1.13e-05	8.72865e-05	2.712e-11	1.13e-13	8.72865e-13	3.264e-05	1.36e-07	1.05053e-06	3.36e-14	1.4e-16	1.08143e-15
				Emissions from Diet						0.0848226			0.0731031			0.0683875			0.641787			0.000921415			0.000238437			0.00049883			0.00029422			4.42167e-05			0.658614			0.793474			4.1843e-09			0.0062137			1.19912e-11
TABLE 23: EMISSION CALCULATION FOR S10M1M2M3
		Characteristics of select foods						Impact Categories
WWEIA Foodcode	Food Description	USDA Main Group	Food subgroup	HENI category	Main ingredient contributing to environmental impacts	RACC (g/serving)	Qty of Diet	Global warming, shorter term (kg CO2 eq/serving)			Global warming, long term (kg CO2 eq/serving)			Land occupation, biodiversity (ha-yr arable/serving)			Fossil energy use (MJ/serving)			Mineral resources use (kg deprived/serving)			Freshwater acidification (kg SO2 eq/serving)			Terrestrial acidification (kg SO2 eq/serving)			Freshwater eutrophication (kg PO4---P- eq/serving)			Marine eutrophication (kg N eq/serving)			Freshwater ecotoxicity (CTUe/serving)			Ionizing radiation (Bq C-14 eq/serving)			Ozone Layer Depletion (kg CFC-11 eq/serving)			Water use (m3/serving)			Photochemical oxidant formation (DALYs/serving)
								HH, EQ			HH, EQ			EQ									EQ			EQ			EQ			EQ			EQ			HH, EQ			HH, EQ						HH
								Mean	Factor	Future Food	Mean	Factor	FF	Mean	Factor	FF	Mean	Factor	FF	Mean	Factor	FF	Mean	Factor	FF	Mean	Factor	FF	Mean	Factor	FF	Mean	Factor	FF	Mean	Factor	FF	Mean	Factor	FF	Mean	Factor	FF	Mean	Factor	FF	Mean	Factor	FF
11111000	Milk, whole	Milk and Dairy	Dairy	Milk	Dairy	244	7.33837	0.62952	0.00258	0.018933	0.40504	0.00166	0.0121817	0.29768	0.00122	0.00895281	2.03496	0.00834	0.061202	0.0027328	1.12e-05	8.21898e-05	0.00102724	4.21e-06	3.08945e-05	0.0026596	1.09e-05	7.99883e-05	0.00025376	1.04e-06	7.63191e-06	8.906e-05	3.65e-07	2.67851e-06	1.70312	0.00698	0.0512218	3.172	0.013	0.0953988	1.88856e-08	7.74e-11	5.6799e-10	0.0207888	8.52e-05	0.000625229	3.6844e-11	1.51e-13	1.10809e-12
21500100	Ground beef, cooked	Protein Foods	Beef	Red meat	Beef	85	0	3.1705	0.0373	0	2.227	0.0262	0	2.227	0.0262	0	15.13	0.178	0	0.024225	0.000285	0	0.0081855	9.63e-05	0	0.02431	0.000286	0	0.002346	2.76e-05	0	0.0008585	1.01e-05	0	9.605	0.113	0	25.5	0.3	0	1.2665e-07	1.49e-09	0	7.106e-05	8.36e-07	0	2.635e-10	3.1e-12	0
24144210	Chicken, drumstick, fried, no coating, skin eaten, NS as to type of fat added in cooking	Protein Foods	Poultry	Poultry	Poultry	85	1.83459	0.44115	0.00519	0.00952154	0.41395	0.00487	0.00893447	0.73865	0.00869	0.0159426	3.9865	0.0469	0.0860424	0.005406	6.36e-05	0.00011668	0.0016235	1.91e-05	3.50407e-05	0.0048365	5.69e-05	0.000104388	0.00069615	8.19e-06	1.50253e-05	0.00016405	1.93e-06	3.54076e-06	2.2015	0.0259	0.047516	4.352	0.0512	0.0939312	3.74e-08	4.4e-10	8.07221e-10	0.02006	0.000236	0.000432964	5.4655e-11	6.43e-13	1.17964e-12
25221405	Pork sausage	Protein Foods	Processed meat	Cured Meats/Poultry	Processed meat	55	0	0.3905	0.0071	0	0.2761	0.00502	0	0.2354	0.00428	0	4.3615	0.0793	0	0.0027445	4.99e-05	0	0.0009295	1.69e-05	0	0.0028435	5.17e-05	0	0.0002904	5.28e-06	0	0.0001848	3.36e-06	0	1.408	0.0256	0	22.605	0.411	0	1.8205e-08	3.31e-10	0	0.0627	0.00114	0	3.1075e-11	5.65e-13	0
26137120	Salmon, baked or broiled, made with oil	Protein Foods	Seafood	Seafood	Seafood	85	7.33837	0.68255	0.00803	0.0589271	0.66555	0.00783	0.0574595	0.3995	0.0047	0.0344904	7.5905	0.0893	0.655317	0.005423	6.38e-05	0.000468188	0.0022015	2.59e-05	0.000190064	0.002856	3.36e-05	0.000246569	0.005474	6.44e-05	0.000472591	0.0006987	8.22e-06	6.03214e-05	2.8475	0.0335	0.245835	9.095	0.107	0.785206	3.1535e-08	3.71e-10	2.72254e-09	0.0034765	4.09e-05	0.000300139	1.496e-10	1.76e-12	1.29155e-11
31103010	Egg, whole, boiled or poached	Protein Foods	Eggs	Eggs	Animal-based (other)	50	0.917297	0.3385	0.00677	0.0062101	0.3325	0.00665	0.00610002	0.37	0.0074	0.00678799	1.775	0.0355	0.032564	0.00765	0.000153	0.000140346	0.000755	1.51e-05	1.38512e-05	0.00177	3.54e-05	3.24723e-05	0.0002605	5.21e-06	4.77911e-06	5.9e-05	1.18e-06	1.08241e-06	2.425	0.0485	0.0444889	1.97	0.0394	0.0361415	1.9e-08	3.8e-10	3.48573e-10	0.01105	0.000221	0.000202723	3.315e-11	6.63e-13	6.08168e-13
41104020	Pinto, calico, or red Mexican beans, dry, cooked, fat not added in cooking	Protein Foods	Legumes	Legumes and soy products	Plant-based, other	90	7.33837	0.006975	7.75e-05	0.000568724	0.006795	7.55e-05	0.000554047	0.005319	5.91e-05	0.000433698	0.07803	0.000867	0.00636237	0.0003051	3.39e-06	2.48771e-05	3.753e-05	4.17e-07	3.0601e-06	5.76e-05	6.4e-07	4.69656e-06	8.289e-06	9.21e-08	6.75864e-07	2.304e-06	2.56e-08	1.87862e-07	0.03204	0.000356	0.00261246	0.1674	0.00186	0.0136494	3.402e-10	3.78e-12	2.7739e-11	0.005553	6.17e-05	0.000452778	2.781e-12	3.09e-14	2.26756e-13
42111200	Peanuts, dry roasted, salted	Protein Foods	Nuts and seeds	Nuts and seeds	Nuts and seeds	30	0.917297	0.0717	0.00239	0.00219234	0.0702	0.00234	0.00214647	0.1803	0.00601	0.00551295	0.318	0.0106	0.00972334	0.001044	3.48e-05	3.19219e-05	0.0002184	7.28e-06	6.67792e-06	0.000657	2.19e-05	2.00888e-05	7.59e-05	2.53e-06	2.32076e-06	2.121e-05	7.07e-07	6.48529e-07	0.2655	0.00885	0.00811807	0.1431	0.00477	0.0043755	3.27e-09	1.09e-10	9.99853e-11	0.00525	0.000175	0.000160527	7.23e-12	2.41e-13	2.21068e-13
56203010	Oatmeal, cooked, regular, fat not added in cooking	Grains	Grains	Cooked Cereals	Plant-based, other	234	8.25567	0.046566	0.000199	0.00164288	0.045396	0.000194	0.0016016	0.194688	0.000832	0.00686872	0.233064	0.000996	0.00822265	0.00075348	3.22e-06	2.65833e-05	0.00016848	7.2e-07	5.94408e-06	0.0004446	1.9e-06	1.56858e-05	0.000125892	5.38e-07	4.44155e-06	1.40166e-05	5.99e-08	4.94515e-07	0.37206	0.00159	0.0131265	0.13221	0.000565	0.00466445	2.808e-09	1.2e-11	9.9068e-11	0.0106236	4.54e-05	0.000374807	5.967e-12	2.55e-14	2.1052e-13
56205008	Rice, white, cooked, fat not added in cooking	Grains	Grains	Cooked Grains	Plant-based, other	140	1.83459	0.2044	0.00146	0.00267851	0.11886	0.000849	0.00155757	0.1337	0.000955	0.00175204	0.8162	0.00583	0.0106957	0.003094	2.21e-05	4.05445e-05	0.0003094	2.21e-06	4.05445e-06	0.0004914	3.51e-06	6.43942e-06	0.0001582	1.13e-06	2.07309e-06	1.2278e-05	8.77e-08	1.60894e-07	2.198	0.0157	0.0288031	0.707	0.00505	0.0092647	7.028e-09	5.02e-11	9.20966e-11	0.04326	0.000309	0.000566889	1.0934e-11	7.81e-14	1.43282e-13
63107010	Banana, raw	Fruit	Fruits	Fruits	Plant-based, other	140	14.6767	0.02772	0.000198	0.002906	0.02646	0.000189	0.0027739	0.011676	8.34e-05	0.00122404	0.2996	0.00214	0.0314082	0.0011298	8.07e-06	0.000118441	0.0002352	1.68e-06	2.46569e-05	0.0009954	7.11e-06	0.000104352	5.95e-05	4.25e-07	6.23762e-06	3.248e-05	2.32e-07	3.405e-06	0.2268	0.00162	0.0237763	0.1932	0.00138	0.0202539	2.002e-09	1.43e-11	2.09877e-10	0.0336	0.00024	0.00352242	4.256e-12	3.04e-14	4.46173e-13
75113000	Lettuce, raw	Vegetables	Vegetables	Vegetables, excluding starchy	Plant-based, other	85	14.6767	0.030345	0.000357	0.0052396	0.029155	0.000343	0.00503412	0.016745	0.000197	0.00289132	0.26095	0.00307	0.0450576	0.00060605	7.13e-06	0.000104645	0.00011475	1.35e-06	1.98136e-05	0.00015215	1.79e-06	2.62714e-05	2.1335e-05	2.51e-07	3.68386e-06	4.4285e-06	5.21e-08	7.64658e-07	0.17	0.002	0.0293535	0.1343	0.00158	0.0231893	2.9325e-09	3.45e-11	5.06348e-10	0.005372	6.32e-05	0.00092757	6.4175e-12	7.55e-14	1.10809e-12
83106000	Italian dressing, made with vinegar and oil	Fats and Oils	Fats and Oils	Oils	Plant-based, other	30	0.917297	0.093	0.0031	0.00284362	0.0918	0.00306	0.00280693	0.1746	0.00582	0.00533867	0.504	0.0168	0.0154106	0.000987	3.29e-05	3.01791e-05	0.0002271	7.57e-06	6.94393e-06	0.000564	1.88e-05	1.72452e-05	9.24e-05	3.08e-06	2.82527e-06	1.977e-05	6.59e-07	6.04498e-07	10.56	0.352	0.322888	0.516	0.0172	0.0157775	5.22e-09	1.74e-10	1.5961e-10	0.00693	0.000231	0.000211896	1.248e-11	4.16e-13	3.81595e-13
92552010	Fruit flavored drink, powdered, reconstituted, diet	Beverages, Nonalcoholic	Beverages, Nonalcoholic	Diet Beverages	Other	240	0	0.000312	1.3e-06	0	0.0002976	1.24e-06	0	0.000468	1.95e-06	0	0.003144	1.31e-05	0	1.8072e-05	7.53e-08	0	9.36e-07	3.9e-09	0	2.0016e-06	8.34e-09	0	4.92e-07	2.05e-09	0	1.3128e-07	5.47e-10	0	0.003192	1.33e-05	0	0.002712	1.13e-05	0	2.712e-11	1.13e-13	0	3.264e-05	1.36e-07	0	3.36e-14	1.4e-16	0
			Emissions from Diet							0.111663			0.10115			0.0901952			0.962006			0.0011846			0.000341001			0.000658197			0.000522286			7.38891e-05			0.817741			1.10185			5.64104e-09			0.00777794			1.85489e-11
[truncated: 12 more columns]

## Sheet: SD2-S2
TABLE 1: DATA BAR VISUALIZATION OF ENVIRONMENTAL IMPACTS: LONGER BAR IS EQUIVALENT TO HIGHER IMPACT
Diet Scenario	Global Warming, Short Term (CO2 eq/100kcal)	Global warming, long term (CO2 eq/100kcal)	Land occupation, biodiversity (ha-yr/100kcal)	Fossil energy use (MJ/serving)	Mineral resources use (kg deprived/100kcal)	Freshwater acidification (kg SO2 eq/100kcal)	Terrestrial acidification (kg SO2 eq/100kcal)	Freshwater eutrophication (kg PO4---P eq/100kcal)	Marine eutrophication (kg N eq/100kcal)	Freshwater ecotoxicity (CTU eq/100kcal)	Ionizing radiation (Bq C-14 eq/100kcal)	Ozone Layer Depletion (kg CFC -11 eq/100kcal)	Water use (m3/100kcal)	Photochemical Oxidant Formation (DALYs/100kcal)	Fine Particulate Matter Formation (DALYs/100kcal)	Human Toxicity (Cancer and Non-cancer)(DALYs/100kcal)	Total Human Health Damages (DALYS/100kcal)	Total Ecosystem Quality Damages (PDF.m2.yr/100kcal)
S1M1/M2/M3	0.187326	0.141504	0.149474	1.09526	0.00171069	0.000489415	0.00135019	0.000232058	5.86907e-05	0.954922	1.96278	8.6133e-09	0.0068375	1.77963e-11	8.7643e-08	8.8097e-08	6.10835e-07	0.241119
S2M1	0.200623	0.155596	0.151716	1.24346	0.00181292	0.000538619	0.00138279	0.000394575	7.78979e-05	1.03822	1.95919	8.97364e-09	0.00706724	2.18283e-11	9.13875e-08	9.48148e-08	6.66035e-07	0.26212
S2M2	0.201547	0.156575	0.153888	1.25378	0.0018267	0.000542718	0.00139571	0.000395763	7.823e-05	1.0427	1.96848	9.07926e-09	0.00712199	2.19552e-11	9.21703e-08	9.54937e-08	6.7034e-07	0.264571
S2M3	0.201481	0.156211	0.153112	1.27577	0.00181734	0.000541163	0.00139688	0.000390116	7.8588e-05	1.03528	2.18529	9.08344e-09	0.00769449	2.18191e-11	9.21701e-08	9.50739e-08	6.68984e-07	0.263456
S3M1	0.184716	0.144327	0.140468	1.16571	0.00169048	0.000497489	0.00126195	0.000381069	7.3425e-05	0.987021	1.82927	8.33166e-09	0.00704069	2.04791e-11	8.36771e-08	8.81839e-08	6.17091e-07	0.243455
S3M2	0.183887	0.143852	0.140827	1.1635	0.00168677	0.000496366	0.00126078	0.000378822	7.30669e-05	0.982201	1.82124	8.33729e-09	0.00702838	2.04057e-11	8.35506e-08	8.7953e-08	6.15148e-07	0.24319
S3M3	0.185002	0.144417	0.140114	1.18743	0.00168851	0.000498089	0.0012691	0.000376456	7.37932e-05	0.981481	1.99689	8.38777e-09	0.00744663	2.04252e-11	8.40391e-08	8.8475e-08	6.18199e-07	0.243156
S4M1	0.168463	0.132747	0.128908	1.0855	0.00156309	0.000455446	0.00113911	0.000366658	6.88064e-05	0.933214	1.69589	7.67167e-09	0.00699175	1.9086e-11	7.5826e-08	8.1302e-08	5.66783e-07	0.224258
S4M2	0.167909	0.132421	0.129044	1.08341	0.0015618	0.000454523	0.00113767	0.000364938	6.8533e-05	0.929969	1.69007	7.67029e-09	0.0069869	1.90341e-11	7.57069e-08	8.11972e-08	5.65498e-07	0.223991
S4M3	0.169139	0.133215	0.129617	1.10213	0.00156941	0.000457218	0.0011472	0.000364362	6.91787e-05	0.932405	1.81047	7.72872e-09	0.00733328	1.91081e-11	7.62972e-08	8.15967e-08	5.69021e-07	0.225075
S5/M1/M2/M3	0.145839	0.116344	0.112639	0.967222	0.00138611	0.000396603	0.00097164	0.000340238	6.17455e-05	0.848286	1.50241	6.73292e-09	0.00683457	1.70505e-11	6.50582e-08	7.16714e-08	4.95952e-07	0.196929
S6M1	0.131949	0.106581	0.102874	0.900855	0.00128075	0.000360802	0.000865297	0.000329746	5.79643e-05	0.805854	1.39083	6.17743e-09	0.00685038	1.59003e-11	5.82913e-08	6.59461e-08	4.53496e-07	0.180785
S6M2	0.132971	0.107345	0.103237	0.906793	0.00128968	0.000363157	0.000869875	0.000332737	5.84452e-05	0.812625	1.40203	6.20689e-09	0.00691195	1.60239e-11	5.86288e-08	6.64029e-08	4.56703e-07	0.181841
S6M3	0.132468	0.107052	0.103039	0.89859	0.00128818	0.000362206	0.000865787	0.000333415	5.81855e-05	0.812317	1.34434	6.18352e-09	0.00677431	1.60121e-11	5.83848e-08	6.62856e-08	4.55396e-07	0.181468
S7M1	0.127838	0.104835	0.100819	0.903543	0.00127268	0.000351917	0.000821854	0.000345641	5.86657e-05	0.826556	1.38513	6.08738e-09	0.00743319	1.59707e-11	5.57938e-08	6.5206e-08	4.45075e-07	0.178271
S7M2	0.117507	0.0961368	0.0909558	0.826776	0.00116587	0.000321721	0.000746685	0.000319869	5.40918e-05	0.762594	1.27526	5.52351e-09	0.00686774	1.46861e-11	5.08162e-08	5.97321e-08	4.07958e-07	0.162536
S7M3	0.115716	0.0949227	0.0900014	0.805061	0.00115522	0.00031767	0.000733333	0.000319348	5.32338e-05	0.757348	1.15174	5.44041e-09	0.00655284	1.45678e-11	4.99802e-08	5.90887e-08	4.02636e-07	0.160757
S8M1	0.103617	0.0865851	0.0828951	0.763847	0.00106414	0.000287654	0.000649268	0.00030695	5.01182e-05	0.716861	1.16123	5.03893e-09	0.00684015	1.35241e-11	4.45253e-08	5.4198e-08	3.66595e-07	0.14769
S8M2	0.103512	0.0863014	0.0811184	0.759933	0.00105995	0.000285669	0.000639563	0.000309278	5.02803e-05	0.719813	1.16292	4.96387e-09	0.00688876	1.3529e-11	4.40004e-08	5.39678e-08	3.65189e-07	0.146271
S8M3	0.100752	0.0844267	0.0795561	0.727082	0.00104358	0.000279409	0.000618917	0.000308428	4.89755e-05	0.711668	0.977242	4.83598e-09	0.00641894	1.3348e-11	4.2708e-08	5.30014e-08	3.57014e-07	0.143464
S9M1	0.0927151	0.0793668	0.075672	0.720382	0.000990411	0.000260329	0.000561993	0.000305645	4.78174e-05	0.695761	1.08371	4.63612e-09	0.00706658	1.27746e-11	3.9065e-08	5.00767e-08	3.34908e-07	0.135964
S9M2	0.0895579	0.0764966	0.0713109	0.693318	0.000954373	0.000249726	0.000532737	0.000298746	4.64826e-05	0.677206	1.05095	4.40598e-09	0.00691058	1.2376e-11	3.72037e-08	4.82218e-08	3.22551e-07	0.130056
S9M3	0.0848226	0.0731031	0.0683875	0.641787	0.000921415	0.000238437	0.00049883	0.00029422	4.42167e-05	0.658614	0.793474	4.1843e-09	0.0062137	1.19912e-11	3.50375e-08	4.63698e-08	3.07878e-07	0.124792
S10M1/M2/M3	0.111663	0.10115	0.0901952	0.962006	0.0011846	0.000341001	0.000658197	0.000522286	7.38891e-05	0.817741	1.10185	5.64104e-09	0.00777794	1.85489e-11	4.70995e-08	6.15725e-08	4.22084e-07	0.174708
TABLE 2: PERCENTAGE EMISSION REDUCTION
Diet Scenario	Global Warming, Short Term (CO2 eq/100kcal)	Global warming, long term (CO2 eq/100kcal)	Land occupation, biodiversity (ha-yr/100kcal)	Fossil energy use (MJ/serving)	Mineral resources use (kg deprived/100kcal)	Freshwater acidification (kg SO2 eq/100kcal)	Terrestrial acidification (kg SO2 eq/100kcal)	Freshwater eutrophication (kg PO4---P eq/100kcal)	Marine eutrophication (kg N eq/100kcal)	Freshwater ecotoxicity (CTU eq/100kcal)	Ionizing radiation (Bq C-14 eq/100kcal)	Ozone Layer Depletion (kg CFC -11 eq/100kcal)	Water use (m3/100kcal)	Photochemical Oxidant Formation (DALYs/100kcal)	Fine Particulate Matter Formation (DALYs/100kcal)	Human Toxicity (Cancer and Non-cancer)(DALYs/100kcal)	Total Human Health Damages (DALYS/100kcal)	Total Ecosystem Quality Damages (PDF.m2.yr/100kcal)
S1M1/M2/M3	0	0	0	0	0	0	0	0	0	0	0	0	0	0	0	0	0	0
S2M1	-7.09825	-9.95877	-1.49994	-13.5306	-5.97595	-10.0537	-2.41499	-70.0331	-32.7262	-8.72328	0.183276	-4.18349	-3.36006	-22.6564	-4.27238	-7.62541	-9.03677	-8.70982
S2M2	-7.59161	-10.6509	-2.95302	-14.4729	-6.78126	-10.8912	-3.37126	-70.5451	-33.292	-9.19263	-0.290163	-5.40975	-4.16079	-23.3698	-5.16561	-8.39607	-9.74162	-9.72621
S2M3	-7.55655	-10.3938	-2.43397	-16.4811	-6.23425	-10.5735	-3.45809	-68.1116	-33.902	-8.41494	-11.3365	-5.45834	-12.5337	-22.6048	-5.16533	-7.91952	-9.51964	-9.26367
S3M1	1.39328	-1.99482	6.02519	-6.43195	1.18152	-1.64976	6.53515	-64.213	-25.1049	-3.36139	6.80205	3.26982	-2.97172	-15.0754	4.52508	-0.098616	-1.02419	-0.968614
S3M2	1.83555	-1.65947	5.78491	-6.23058	1.39827	-1.42028	6.6216	-63.2447	-24.4948	-2.85661	7.21145	3.20452	-2.79169	-14.6626	4.66942	0.163504	-0.706133	-0.858833
S3M3	1.24068	-2.05868	6.26181	-8.41515	1.29656	-1.77224	6.00596	-62.225	-25.7323	-2.78123	-1.73764	2.61837	-8.9087	-14.7724	4.11205	-0.429057	-1.2055	-0.8445
S4M1	10.0695	6.18859	13.7588	0.89078	8.62801	6.94067	15.6329	-58.0028	-17.2356	2.27335	13.5976	10.9322	-2.25604	-7.2472	13.4832	7.71315	7.21182	6.99276
S4M2	10.3655	6.4189	13.6682	1.08162	8.70349	7.12927	15.7397	-57.2618	-16.7697	2.6131	13.8944	10.9483	-2.18501	-6.95541	13.619	7.83203	7.42218	7.10378
S4M3	9.70861	5.8579	13.2849	-0.627304	8.25904	6.5786	15.0339	-57.0136	-17.8699	2.35806	7.76005	10.2699	-7.25092	-7.37153	12.9455	7.3786	6.84541	6.65429
S5/M1/M2/M3	22.1468	17.7804	24.6434	11.6903	18.9736	18.9639	28.0366	-46.6178	-5.20487	11.167	23.4551	21.8311	0.042756	4.1904	25.7692	18.6449	18.8076	18.3272
S6M1	29.5618	24.6795	31.1762	17.7497	25.1327	26.2789	35.9128	-42.0965	1.23765	15.6106	29.14	28.2804	-0.188435	10.6535	33.4901	25.1438	25.758	25.0227
S6M2	29.0162	24.14	30.9333	17.2075	24.6106	25.7977	35.5737	-43.3853	0.418379	14.9014	28.5695	27.9383	-1.08887	9.9594	33.1051	24.6252	25.233	24.5847
S6M3	29.2845	24.3467	31.0656	17.9565	24.6982	25.992	35.8765	-43.6777	0.860817	14.9338	31.5086	28.2097	0.924122	10.0255	33.3835	24.7585	25.447	24.7392
S7M1	31.7564	25.9135	32.5511	17.5043	25.6047	28.0944	39.1304	-48.9461	0.0425439	13.4425	29.4305	29.3258	-8.71206	10.2582	36.3398	25.9839	27.1367	26.0651
S7M2	37.2711	32.0607	39.1494	24.5134	31.8481	34.2642	44.6977	-37.8401	7.8359	20.1407	35.0277	35.8723	-0.442264	17.4766	42.0191	32.1974	33.2131	32.5909
S7M3	38.2273	32.9186	39.788	26.496	32.4707	35.0918	45.6866	-37.6156	9.29774	20.6901	41.3209	36.8371	4.16318	18.1411	42.973	32.9277	34.0843	33.3288
S8M1	44.686	38.8108	44.5422	30.2589	37.7946	41.2249	51.9128	-32.273	14.6063	24.9299	40.8377	41.4983	-0.0387878	24.0058	49.1969	38.4792	39.9846	38.7484
S8M2	44.7422	39.0113	45.7308	30.6163	38.0398	41.6305	52.6315	-33.2761	14.3301	24.6208	40.7514	42.3697	-0.749746	23.9783	49.7959	38.7405	40.2148	39.3367
S8M3	46.2156	40.3361	46.776	33.6156	38.9965	42.9095	54.1606	-32.9101	16.5532	25.4737	50.2114	43.8544	6.1215	24.9954	51.2705	39.8374	41.5531	40.501
S9M1	50.506	43.9119	49.3745	34.2273	42.1047	46.8082	58.3766	-31.7107	18.5264	27.1395	44.7871	46.1749	-3.35031	28.2176	55.4272	43.1573	45.1722	43.6113
S9M2	52.1914	45.9403	52.2921	36.6983	44.2113	48.9746	60.5435	-28.7377	20.8007	29.0826	46.4562	48.8468	-1.06885	30.4575	57.5508	45.2629	47.195	46.0614
S9M3	54.7192	48.3384	54.2479	41.4033	46.1379	51.2813	63.0547	-26.7873	24.6615	31.0295	59.574	51.4205	9.12313	32.6194	60.0225	47.365	49.5972	48.2449
S10M1/M2/M3	40.3908	28.5177	39.6583	12.1665	30.7534	30.3247	51.2514	-125.067	-25.8956	14.3658	43.8628	34.5078	-13.7542	-4.22938	46.2598	30.1083	30.9005	27.5428

## Sheet: SD2-S3
	TABLE 1: COLOUR AND ICON CODING OF ENVIRONMENTAL IMPACT (HIGH : X≥70%; MIDPOINT: X≥30<HIGH; LOW: X<MIDPOINT)									VERY HIGH
										VERY LOW
	Diet Scenario	Global Warming, Short Term (CO2 eq/100kcal)	Global warming, long term (CO2 eq/100kcal)	Land occupation, biodiversity (ha-yr/100kcal)	Total Ecosystem Quality Damages (PDF.m2.yr/100kcal)		Diet Scenario	Fossil energy use (MJ/100kcal)	Freshwater ecotoxicity (CTU eq/100kcal)	Ionizing radiation (Bq C-14 eq/100kcal)		Diet Scenario	Mineral resources use (kg deprived/100kcal)	Freshwater acidification (kg SO2 eq/100kcal)	Terrestrial acidification (kg SO2 eq/100kcal)	Freshwater eutrophication (kg PO4---P eq/100kcal)	Water use (m3/100kcal)		Diet Scenario	Marine eutrophication (kg N eq/100kcal)	Ozone Layer Depletion (kg CFC -11 eq/100kcal)	Photochemical Oxidant Formation (DALYs/100kcal)	Fine Particulate Matter Formation (DALYs/100kcal)	Human Toxicity (Cancer and Non-cancer)(DALYs/100kcal)	Total Human Health Damages (DALYS/100kcal)
1	S1M1/M2/M3	0.187326	0.141504	0.149474	0.241119		S1M1/M2/M3	1.09526	0.954922	1.96278		S1M1/M2/M3	0.00171069	0.000489415	0.00135019	0.000232058	0.0068375		S1M1/M2/M3	5.86907e-05	8.6133e-09	1.77963e-11	8.7643e-08	8.8097e-08	6.10835e-07
2	S2M1	0.200623	0.155596	0.151716	0.26212		S2M1	1.24346	1.03822	1.95919		S2M1	0.00181292	0.000538619	0.00138279	0.000394575	0.00706724		S2M1	7.78979e-05	8.97364e-09	2.18283e-11	9.13875e-08	9.48148e-08	6.66035e-07
3	S2M2	0.201547	0.156575	0.153888	0.264571		S2M2	1.25378	1.0427	1.96848		S2M2	0.0018267	0.000542718	0.00139571	0.000395763	0.00712199		S2M2	7.823e-05	9.07926e-09	2.19552e-11	9.21703e-08	9.54937e-08	6.7034e-07
4	S2M3	0.201481	0.156211	0.153112	0.263456		S2M3	1.27577	1.03528	2.18529		S2M3	0.00181734	0.000541163	0.00139688	0.000390116	0.00769449		S2M3	7.8588e-05	9.08344e-09	2.18191e-11	9.21701e-08	9.50739e-08	6.68984e-07
5	S3M1	0.184716	0.144327	0.140468	0.243455		S3M1	1.16571	0.987021	1.82927		S3M1	0.00169048	0.000497489	0.00126195	0.000381069	0.00704069		S3M1	7.3425e-05	8.33166e-09	2.04791e-11	8.36771e-08	8.81839e-08	6.17091e-07
6	S3M2	0.183887	0.143852	0.140827	0.24319		S3M2	1.1635	0.982201	1.82124		S3M2	0.00168677	0.000496366	0.00126078	0.000378822	0.00702838		S3M2	7.30669e-05	8.33729e-09	2.04057e-11	8.35506e-08	8.7953e-08	6.15148e-07
7	S3M3	0.185002	0.144417	0.140114	0.243156		S3M3	1.18743	0.981481	1.99689		S3M3	0.00168851	0.000498089	0.0012691	0.000376456	0.00744663		S3M3	7.37932e-05	8.38777e-09	2.04252e-11	8.40391e-08	8.8475e-08	6.18199e-07
8	S4M1	0.168463	0.132747	0.128908	0.224258		S4M1	1.0855	0.933214	1.69589		S4M1	0.00156309	0.000455446	0.00113911	0.000366658	0.00699175		S4M1	6.88064e-05	7.67167e-09	1.9086e-11	7.5826e-08	8.1302e-08	5.66783e-07
9	S4M2	0.167909	0.132421	0.129044	0.223991		S4M2	1.08341	0.929969	1.69007		S4M2	0.0015618	0.000454523	0.00113767	0.000364938	0.0069869		S4M2	6.8533e-05	7.67029e-09	1.90341e-11	7.57069e-08	8.11972e-08	5.65498e-07
10	S4M3	0.169139	0.133215	0.129617	0.225075		S4M3	1.10213	0.932405	1.81047		S4M3	0.00156941	0.000457218	0.0011472	0.000364362	0.00733328		S4M3	6.91787e-05	7.72872e-09	1.91081e-11	7.62972e-08	8.15967e-08	5.69021e-07
11	S5/M1/M2/M3	0.145839	0.116344	0.112639	0.196929		S5/M1/M2/M3	0.967222	0.848286	1.50241		S5/M1/M2/M3	0.00138611	0.000396603	0.00097164	0.000340238	0.00683457		S5/M1/M2/M3	6.17455e-05	6.73292e-09	1.70505e-11	6.50582e-08	7.16714e-08	4.95952e-07
12	S6M1	0.131949	0.106581	0.102874	0.180785		S6M1	0.900855	0.805854	1.39083		S6M1	0.00128075	0.000360802	0.000865297	0.000329746	0.00685038		S6M1	5.79643e-05	6.17743e-09	1.59003e-11	5.82913e-08	6.59461e-08	4.53496e-07
13	S6M2	0.132971	0.107345	0.103237	0.181841		S6M2	0.906793	0.812625	1.40203		S6M2	0.00128968	0.000363157	0.000869875	0.000332737	0.00691195		S6M2	5.84452e-05	6.20689e-09	1.60239e-11	5.86288e-08	6.64029e-08	4.56703e-07
14	S6M3	0.132468	0.107052	0.103039	0.181468		S6M3	0.89859	0.812317	1.34434		S6M3	0.00128818	0.000362206	0.000865787	0.000333415	0.00677431		S6M3	5.81855e-05	6.18352e-09	1.60121e-11	5.83848e-08	6.62856e-08	4.55396e-07
15	S7M1	0.127838	0.104835	0.100819	0.178271		S7M1	0.903543	0.826556	1.38513		S7M1	0.00127268	0.000351917	0.000821854	0.000345641	0.00743319		S7M1	5.86657e-05	6.08738e-09	1.59707e-11	5.57938e-08	6.5206e-08	4.45075e-07
16	S7M2	0.117507	0.0961368	0.0909558	0.162536		S7M2	0.826776	0.762594	1.27526		S7M2	0.00116587	0.000321721	0.000746685	0.000319869	0.00686774		S7M2	5.40918e-05	5.52351e-09	1.46861e-11	5.08162e-08	5.97321e-08	4.07958e-07
17	S7M3	0.115716	0.0949227	0.0900014	0.160757		S7M3	0.805061	0.757348	1.15174		S7M3	0.00115522	0.00031767	0.000733333	0.000319348	0.00655284		S7M3	5.32338e-05	5.44041e-09	1.45678e-11	4.99802e-08	5.90887e-08	4.02636e-07
18	S8M1	0.103617	0.0865851	0.0828951	0.14769		S8M1	0.763847	0.716861	1.16123		S8M1	0.00106414	0.000287654	0.000649268	0.00030695	0.00684015		S8M1	5.01182e-05	5.03893e-09	1.35241e-11	4.45253e-08	5.4198e-08	3.66595e-07
19	S8M2	0.103512	0.0863014	0.0811184	0.146271		S8M2	0.759933	0.719813	1.16292		S8M2	0.00105995	0.000285669	0.000639563	0.000309278	0.00688876		S8M2	5.02803e-05	4.96387e-09	1.3529e-11	4.40004e-08	5.39678e-08	3.65189e-07
20	S8M3	0.100752	0.0844267	0.0795561	0.143464		S8M3	0.727082	0.711668	0.977242		S8M3	0.00104358	0.000279409	0.000618917	0.000308428	0.00641894		S8M3	4.89755e-05	4.83598e-09	1.3348e-11	4.2708e-08	5.30014e-08	3.57014e-07
21	S9M1	0.0927151	0.0793668	0.075672	0.135964		S9M1	0.720382	0.695761	1.08371		S9M1	0.000990411	0.000260329	0.000561993	0.000305645	0.00706658		S9M1	4.78174e-05	4.63612e-09	1.27746e-11	3.9065e-08	5.00767e-08	3.34908e-07
22	S9M2	0.0895579	0.0764966	0.0713109	0.130056		S9M2	0.693318	0.677206	1.05095		S9M2	0.000954373	0.000249726	0.000532737	0.000298746	0.00691058		S9M2	4.64826e-05	4.40598e-09	1.2376e-11	3.72037e-08	4.82218e-08	3.22551e-07
23	S9M3	0.0848226	0.0731031	0.0683875	0.124792		S9M3	0.641787	0.658614	0.793474		S9M3	0.000921415	0.000238437	0.00049883	0.00029422	0.0062137		S9M3	4.42167e-05	4.1843e-09	1.19912e-11	3.50375e-08	4.63698e-08	3.07878e-07
24	S10M1/M2/M3	0.111663	0.10115	0.0901952	0.174708		S10M1/M2/M3	0.962006	0.817741	1.10185		S10M1/M2/M3	0.0011846	0.000341001	0.000658197	0.000522286	0.00777794		S10M1/M2/M3	7.38891e-05	5.64104e-09	1.85489e-11	4.70995e-08	6.15725e-08	4.22084e-07

## Sheet: SD2-S4
Table 1: Emission Reduction with Corresponding Variations in Meat and Legumes for Model 1
	M1
Scenario	Legumes (%)	Processed meat (%)	Redmeat (%)	White meat (%)	GWP Reduction (%)	Fossil Energy UseReduction	Land use reduction	Human Toxicity (Cancer and Non Cancer Reduction)	Terrestrial acidifcation reduction	Freshwater eutrophication reduction
S1	0	2.78	5.56	4.17	0	0	0	0	0	0
S2	0.67	1.39	4.89	3.47	-7.08	-13.5306	-1.49994	-7.62541	-2.41499	-70.0331
S3	1.33	1.39	4.22	3.47	1.39	-6.43195	6.02519	-0.098616	6.53515	-64.213
S4	2	1.39	3.56	3.47	10.07	0.89078	13.7588	7.71315	15.6329	-58.0028
S5	5.56	1.39	2.78	3.47	22.15	11.6903	24.6434	18.6449	28.0366	-46.6178
S6	6.22	1.39	2.11	3.47	29.56	17.7497	31.1762	25.1438	35.9128	-42.0965
S7	6.89	1.39	1.44	3.47	31.76	17.5043	32.5511	25.9839	39.1304	-48.9461
S8	7.56	1.39	0.78	3.47	44.69	30.2589	44.5422	38.4792	51.9128	-32.273
S9***	8.22	1.39	0.11	3.47	50.51	34.2273	49.3745	43.1573	58.3766	-31.7107
S10	11.11	0	0	2.78	40.39	12.1665	39.6583	30.1083	51.2514	-125.067
Table 2: Emission Reduction with Corresponding Variations in Meat and Legumes for Model 2
	M2
Scenario	Legumes(%)	Processed meat (%)	Redmeat (%)	White meat(%)	GWP Reduction (%)	Fossil Energy Use Reduction	Land Use Reduction	Human Toxicity (Cancer and Non Cancer Reduction)	Terrestrial Acidication	Freshwater eutrophication reduction
S1	0	2.78	5.56	4.17	0	0	0	0	0	0
S2	0.83	1.39	4.89	4	-7.59	-14.4729	-2.95302	-8.39607	-3.37126	-70.5451
S3	1.67	1.39	4.22	3.83	1.84	-6.23058	5.78491	0.163504	6.6216	-63.2447
S4	2.5	1.39	3.56	3.67	10.37	1.08162	13.6682	7.83203	15.7397	-57.2618
S5	5.56	1.39	2.78	3.47	22.15	11.6903	24.6434	18.6449	28.0366	-46.6178
S6	6.39	1.39	2.11	3.31	29.02	17.2075	30.9333	24.6252	35.5737	-43.3853
S7	7.22	1.39	1.44	3.14	37.27	24.5134	39.1494	32.1974	44.6977	-37.8401
S8	8.06	1.39	0.78	2.97	44.74	30.6163	45.7308	38.7405	52.6315	-33.2761
S9***	8.89	1.39	0.11	2.81	52.19	36.6983	52.2921	45.2629	60.5435	-28.7377
S10	11.11	0	0	2.78	40.39	12.1665	39.6583	30.1083	51.2514	-125.067
Table 3: Emission Reduction with Corresponding Variations in Meat and Legumes for Model 3
	M3
Scenario	Legumes (%)	Processed meat (%)	Red meat (%)	White meat (%)	GWP Reduction (%)	Fossil Energy Use Reduction	Land Use Reduction	Human Toxicity (Cancer and Non Cancer Reduction)	Terrestrial acidification reduction	Fresh water eutrophication reduction
S1	0	2.78	5.56	4.17	0	0	0	0	0	0
S2	1.11	2.5	4.89	4	-7.56	-16.4811	-2.43397	-7.91952	-3.45809	-68.1116
S3	2.22	2.22	4.22	3.83	1.24	-8.41515	6.26181	-0.429057	6.00596	-62.225
S4	3.33	1.94	3.56	3.67	9.71	-0.627304	13.2849	7.3786	15.0339	-57.0136
S5	5.56	1.39	2.78	3.47	22.15	11.6903	24.6434	18.6449	28.0366	-46.6178
S6	6.67	1.11	2.11	3.31	29.28	17.9565	31.0656	24.7585	35.8765	-43.6777
S7	7.78	0.83	1.44	3.14	38.23	26.496	39.788	32.9277	45.6866	-37.6156
S8	8.89	0.56	0.78	2.97	46.22	33.6156	46.776	39.8374	54.1606	-32.9101
S9***	10	0.28	0.11	2.81	54.72	41.4033	54.2479	47.365	63.0547	-26.7873
S10	11.11	0	0	2.78	40.39	12.1665	39.6583	30.1083	51.2514	-125.067
***Scenario with the highest percentage reduction in environmental impact; overall, S9M3 resulted in the greatest reduction in each impact
