# Supplementary material for: Transitioning to Plant-based Diets: Exploring the Environmental Nutrition Performance of 24 Composite Diet Scenarios
Source: Research Square preprint supplement (doi:10.21203/rs.3.rs-2750008/v1), 2023-04-27
Supplement: Supplementary file 2 [file 8bdbaa15027535666a8c0a05.xlsx]

## Sheet: SD1-S1
Table 1: Representative Diet Selection for Environmental Impact Estimation
S/N	Food Compass	This study (Adapted from Food4healthylife)	Popularly consumed diet representative in USA	Equivalence in WWEIA	Sheet description: This sheet presents the VARIOUS FOOD GROUPS AND MODEL DIETS used in this study
1	Whole grains	Whole grains	Oat	Oatmeal, cooked, regular, fat not added in cooking	Food compass column represents the food groups defined in the food compass scoring system
2	Nuts and Seeds	Nuts	Peanut	Peanuts, dry roasted, salted	This study column represent the food groups defined in the foodforhealthy life study which were also used in this study
3	Beans and legumes	Legumes	Pinto beans	Pinto, calico, or red Mexican beans, dry, cooked, fat not added in cooking	Popularly consumed diet representative in USA represents the diet selected to represent each food group based on their prominence in the USA market using the USDA database as a guide
4	Vegetables, non starchy	Vegetables	Brocolli	Lettuce, raw	Equivalence in WWEIA: Represents diets with the highest proximity in nutritional features compared to popularly consumed diets, and had their environmental emission information available in the HENI emissions database were selected from the What We Eat in America (WWEIA) database for the emission calculation
5	Fruits	Fruits	Bananas	Banana, raw
6	Refined grains	Refined grains	White rice	Rice, white, with peas, fat not added in cooking
7	Seafood	Fish	Salmon	Salmon, baked or broiled, made with oil
8	Red or processed meats	Processed meat	Luncheon meat	Pork sausage
9	Red or processed meats	Red meat	Beef	Ground beef, cooked
10	Yoghurt	Milk/dairy	Cowmilk	Milk, whole
11	Red or processed meats	Eggs	Egg	Egg, whole, boiled or poached
12	Red or processed meats	White meat	Chicken	Chicken, drumstick, fried, no coating, skin eaten, NS as to type of fat added in cooking
13	Partially hydrogenated oil	Added oils	Cooking oil	Italian dressing, made with vinegar and oil
14	Artificial sweeteners	Sugar sweetened beverages	Apple juice	Fruit flavored drink, powdered, reconstituted, diet

## Sheet: SD1-S2
Table 1: Mass Conversion of food compass target scores from ounces/cups to grams
Food Compass	Envnut Food group	Popularly consumed in USA	Quantity (cups/oz)	Equivalence in grams	Conversion factor	FCT (cups/oz)	FCT (grams)	Source
Whole grains	Whole grains	Oat	1 ounce (uncooked)	19.5	19.5xFCT	1.01	19.695	https://www.howmany.wiki/vw/--1--oz--of--oats--in--gram
Nuts and Seeds	Nuts	Peanut	1 ounce (shelled)	20.4	20.4xFCT	1.22	24.888	https://www.howmany.wiki/vw/--1--ounce--of--peanuts--in--gram
Beans and legumes	Legumes	Pinto beans	1 cup (dried)	180	180xFCT	0.44	79.2	https://www.howmany.wiki/vw/--1--cup--of--dried-beans--in--gram
Vegetables, non starchy	Vegetables	Brocolli	1 cup (raw)	71	71.0xFCT	3.29	233.59	https://www.howmany.wiki/vw/--1--cup--of--broccoli--in--gram
Fruits	Fruits	Bananas	1 cup (sliced)	225	225xFCT	1.66	373.5	https://www.howmany.wiki/vw/--1--cup--of--sliced-banana--in--gram
Refined grains	Refined grains	White rice	1 ounce(white medium rice)	23.7	23.7xFCT	1.36	32.232	https://www.howmany.wiki/vw/--1--oz--of--white-rice--in--gram
Seafood	Fish	Salmon	1 ounce (raw)	28.3	28.3xFCT	3.89	110.087	https://theknowledgeburrow.com/how-many-grams-is-4-ounces-of-salmon/
Red or processed meats	Red meat	Beef/Luncheon meat	1 ounce (raw)	28.34	28.34xFCT	2.25	63.765	https://ids-water.com/2021/04/06/how-many-grams-are-in-1-oz-of-meat/
Yoghurt	Milk/dairy	Cowmilk	1 cup (whole milk)	249	249xFCT	0.55	136.95	https://www.healthline.com/nutrition/milk#:~:text=One%20cup%20(249%20grams)%20of,Protein%3A%208.14%20grams

## Sheet: SD1-S3
Transition to Plant Based Proteins: Consumption Model 1
S/N	Food/g	S1	S2	S3	S4	S5	S6	S7	S8	S9	S10
1	Whole grains	50	137.5	137.5	137.5	137.5	137.5	137.5	137.5	137.5	225
2	Nuts	0	12.5	12.5	12.5	12.5	12.5	12.5	12.5	12.5	25		Feasible sum	Current consumption sum
3	Legumes	0	12	24	36	100	112	124	136	148	200		150	100
4	Vegetables	250	325	325	325	325	325	325	325	325	400
5	Fruits	200	300	300	300	300	300	300	300	300	400
6	Refined grains	150	100	100	100	100	100	100	100	100	50
7	Fish	50	125	125	125	125	125	125	125	125	200
8	Processed meat	50	25	25	25	25	25	25	25	25	0		Food groud	Mathematical model for diet quantity estimation	Sequence difference (x)
9	Red meat	100	88	76	64	50	38	26	14	2	0		Red meat (i)	An= A - xi(n-1)	12
10	Milk/dairy	300	250	250	250	250	250	250	250	250	200		Legume	An=Sum of diet for target groups including legume - (Sum of the quantity of removed targed animal-based foods)
11	Eggs	50	37.5	37.5	37.5	37.5	37.5	37.5	37.5	37.5	25			An = new quantity of diet
12	White meat	75	62.5	62.5	62.5	62.5	62.5	62.5	62.5	62.5	50			A = sum of predefined current of feasible diet quantity for food group the group to be varied
13	Added oils	25	25	25	25	25	25	25	25	25	25			n = scenario number
14	Sugar sweetened beverages	500	300	300	300	250	250	250	250	250	0			Scenarios 2 to 4 were based on the predefined current diet and 6 to 9 were based on the predefined feasible diet quantity for the meats and legume variation
	Total Weight(g)	1800	1800	1800	1800	1800	1800	1800	1800	1800	1800			Sequence difference were selected based on which value gives diet quantity values between the predefined current and optimum values
														420

## Sheet: SD1-S4
Transition to Plant Based Diets: Consumption Model 2
S/N	Food	S1	S2	S3	S4	S5	S6	S7	S8	S9	S10
1	Whole grains	50	137.5	137.5	137.5	137.5	137.5	137.5	137.5	137.5	225
2	Nuts	0	12.5	12.5	12.5	12.5	12.5	12.5	12.5	12.5	25		Feasible sum	Current consumption sum
3	Legumes	0	15	30	45	100	115	130	145	160	200		212.5	175
4	Vegetables	250	325	325	325	325	325	325	325	325	400
5	Fruits	200	300	300	300	300	300	300	300	300	400
6	Refined grains	150	100	100	100	100	100	100	100	100	50
7	Fish	50	125	125	125	125	125	125	125	125	200
8	Processed meat	50	25	25	25	25	25	25	25	25	0		Food	Mathematical Model		Sequence difference (x)
9	Red meat	100	88	76	64	50	38	26	14	2	0		Red meat (i)	An=A - xi(n-1)		12
10	Milk/dairy	300	250	250	250	250	250	250	250	250	200		Legume	An=Sum of diet for target groups including legume - (Sum of the quantity of removed targed animal-based foods)
11	Eggs	50	37.5	37.5	37.5	37.5	37.5	37.5	37.5	37.5	25
12	White meat	75	72	69	66	62.5	59.5	56.5	53.5	50.5	50		White meat (j)	An=A - xk (n-1)		3
13	Added oils	25	25	25	25	25	25	25	25	25	25		An = new quantity of diet
14	Sugar sweetened beverages	500	287.5	287.5	287.5	250	250	250	250	250	0		A = sum of predefined current of feasible diet quantity for food group the group to be varied
	Total Weight (g)	1800	1800	1800	1800	1800	1800	1800	1800	1800	1800		n = scenario number
													Scenarios 2 to 4 were based on the predefined current diet and 6 to 9 were based on the predefined feasible diet quantity for the meats and legume variation
													Sequence difference were selected based on which value gives diet quantity values between the predefined current and optimum values

## Sheet: SD1-S5
Transition to Plant Based Diets: Consumption Model 3
S/N	Food	S1	S2	S3	S4	S5	S6	S7	S8	S9	S10
1	Whole grains	50	137.5	137.5	137.5	137.5	137.5	137.5	137.5	137.5	225
2	Nuts	0	12.5	12.5	12.5	12.5	12.5	12.5	12.5	12.5	25		Feasible sum	Current consumption sum
3	Legumes	0	20	40	60	100	120	140	160	180	200		237.5	225
4	Vegetables	250	325	325	325	325	325	325	325	325	400
5	Fruits	200	300	300	300	300	300	300	300	300	400
6	Refined grains	150	100	100	100	100	100	100	100	100	50
7	Fish	50	125	125	125	125	125	125	125	125	200		Food	Mathematical Model		Sequence difference (x)
8	Processed meat	50	45	40	35	25	20	15	10	5	0		Processed meat (k)	An=A - xk(n-1)		5
9	Red meat	100	88	76	64	50	38	26	14	2	0		Red meat (i)	An=A - xi(n-1)		12
10	Milk/dairy	300	250	250	250	250	250	250	250	250	200		Legume	An=Sum of diet for target groups including legume - (Sum of the quantity of removed targed animal-based foods)
11	Eggs	50	37.5	37.5	37.5	37.5	37.5	37.5	37.5	37.5	25
12	White meat	75	72	69	66	62.5	59.5	56.5	53.5	50.5	50		White meat (j)	An=A - xj(n-1)		3
13	Added oils	25	25	25	25	25	25	25	25	25	25			An = new quantity of diet
14	Sugar sweetened beverages	500	262	262	262	250	250	250	250	250	0			A = sum of predefined current of feasible diet quantity for food group the group to be varied
	Total Weight (g)	1800	1799.5	1799.5	1799.5	1800	1800	1800	1800	1800	1800			n = scenario number
														Scenarios 2 to 4 were based on the predefined current diet and 6 to 9 were based on the predefined feasible diet quantity for the meats and legume variation
														Sequence difference were selected based on which value gives diet quantity values between the predefined current and optimum values

## Sheet: SD1-S6
Table 1: Scenario Coding						Code Description
Scenario	Legumes (%)	Processed meat (%)	Redmeat (%)	White meat (%)	.	S represents the Scenario and M represents the Consumption Model under which the Scenario is Found. Therefore, S1 means scenario 1 and M1 means Consumption Model 1. S1M1 represents diet scenario 1 under consumption model 1
S1M1M2M3	0	2.78	5.56	4.17
S2M1	0.67	1.39	4.89	3.47
S3M1	1.33	1.39	4.22	3.47
S4M1	2	1.39	3.56	3.47
S5M1M2M3	5.56	1.39	2.78	3.47
S6M1	6.22	1.39	2.11	3.47
S7M1	6.89	1.39	1.44	3.47
S8M1	7.56	1.39	0.78	3.47
S9M1	8.22	1.39	0.11	3.47
S10M1M2M3	11.11	0	0	2.78
S1M2	0	2.78	5.56	4.17
S2M2	0.83	1.39	4.89	4
S3M2	1.67	1.39	4.22	3.83
S4M2	2.5	1.39	3.56	3.67
S6M2	6.39	1.39	2.11	3.31
S7M2	7.22	1.39	1.44	3.14
S8M2	8.06	1.39	0.78	2.97
S9M2	8.89	1.39	0.11	2.81
S10M2	11.11	0	0	2.78
S1M3	0	2.78	5.56	4.17
S2M3	1.11	2.5	4.89	4
S3M3	2.22	2.22	4.22	3.83
S4M3	3.33	1.94	3.56	3.67
S5M3	5.56	1.39	2.78	3.47
S6M3	6.67	1.11	2.11	3.31
S7M3	7.78	0.83	1.44	3.14
S8M3	8.89	0.56	0.78	2.97
S9M3	10	0.28	0.11	2.81

## Sheet: SD1-S7
Table 1: Nutritional Profiling for Various Diet Scenarios
			Diet Scenarios
Nutrient	S1M1/M2/M3		S2M1		S2M2		S2M3		S3M1		S3M2		S3M3		S4M1		S4M2		S4M3		S5M1/M2/M3		S6M1		S6M2		S6M3		S7M1		S7M2		S7M3		S8M1		S8M2		S8M3		S9M1		S9M2		S9M3		S10M1/M2/M3
Nutrient ratios	B61	100kcal	D61	100kcal	F61	100kcal	H61	100kcal	J61	100kcal	L61	100kcal,	N61	100kcal	P61	100kcal	R61	100kcal	T61	100kcal	V61	100kcal	X61	100kcal	Z61	100kcal	AB61	100kcal	AD61	100kcal	AF61	100kcal	AH61	100kcal	AJ61	100kcal	AL61	100kcal	AN61	100kcal	AP61	100kcal	AR61	100kcal	AT61	100kcal	2000kcal	100kcal
Unsaturated:Saturated fat	2.16494	2.16494	1.91139	1.91139	2.24439	2.24439	2.47832	2.47832	2.02862	2.02862	2.96728	2.96728	2.64392	2.64392	2.05958	2.05958	2.66611	2.66611	2.65313	2.65313	1.97947	1.97947	1.98902	1.98902	2.74537	2.74537	2.50025	2.50025	2.31978	2.31978	2.77542	2.77542	2.78229	2.78229	2.35492	2.35492	2.80666	2.80666	2.75325	2.75325	2.87981	2.87981	2.83889	2.83889	2.85305	2.85305	2.82261	2.82261
Fibre:Carbohydrate	0.051032	0.051032	0.0806653	0.0806653	0.0808793	0.0808793	0.0812319	0.0812319	0.0814601	0.0814601	0.0819638	0.0819638	0.0824153	0.0824153	0.0822422	0.0822422	0.082774	0.082774	0.0837528	0.0837528	0.086146	0.086146	0.0866602	0.0866602	0.0868974	0.0868974	0.0872093	0.0872093	0.0832421	0.0832421	0.0878105	0.0878105	0.0882466	0.0882466	0.0880491	0.0880491	0.0885158	0.0885158	0.0894309	0.0894309	0.0887281	0.0887281	0.0893971	0.0893971	0.0904166	0.0904166	0.139673	0.139673
Potassium:Sodium	6.38627	6.38627	9.51113	9.51113	7.01096	7.01096	7.53499	7.53499	9.55949	9.55949	9.49007	9.49007	7.99128	7.99128	9.60763	9.60763	9.5586	9.5586	8.49025	8.49025	9.56318	9.56318	9.60761	9.60761	9.62727	9.62727	10.2187	10.2187	7.84904	7.84904	9.69069	9.69069	7.84904	7.84904	9.69539	9.69539	9.75375	9.75375	11.7646	11.7646	9.73888	9.73888	9.81616	9.81616	12.6849	12.6849	15.3751	15.3751
Carbohydrate	615.3	17.1147	481	15.7055	482.2	15.6907	483.8	15.384	484.9	15.7203	486.8	15.6174	490.2	15.556	488.8	15.6914	491.7	15.6666	496.7	15.7266	509.6	15.7	513.5	15.8047	514.4	16.0123	516	16.134	456.5	15.1958	519.3	16.1493	522.4	16.2997	521.3	15.9164	524.2	16.2841	528.9	16.5141	525.2	16.4969	529.1	16.4206	535.3	16.5396	403.8	14.8162
Protein	134.8	3.74949	139.2	4.54512	131.6	4.28224	146.1	4.64572	137.3	4.45122	139.6	4.47861	143.2	4.54432	135.3	4.34339	137.2	4.37149	140.4	4.44536	138	4.25157	136	4.18586	135.5	4.21786	135.1	4.22424	128.2	4.26748	133	4.13607	132.3	4.12798	132.2	4.03634	130.6	4.05705	129.4	4.04032	130.2	4.08967	128.1	3.97558	126.6	3.91167	141.2	5.18089
Lipids	66.084	1.83814	64.647	2.11084	68.662	2.23425	69.47	2.20902	66.194	2.14599	67.938	2.17957	68.621	2.17762	68.742	2.20675	69.213	2.20528	67.772	2.14581	72.829	2.24375	72.337	2.22642	68.103	2.11992	65.979	2.063	73.924	2.46076	67.379	2.09537	65.129	2.03213	73.472	2.24325	66.654	2.07059	63.28	1.97582	62.448	1.96153	65.93	2.04614	65.43	2.02165	60.6	2.22353
Saturated fat	22.772	0.633408	22.007	0.718567	20.336	0.66173	17.572	0.558758	22.084	0.715956	14.029	0.450074	17.221	0.546492	22.61	0.725825	16.724	0.532863	16.871	0.534172	24.455	0.753421	24.221	0.745483	16.149	0.502688	18.105	0.566098	21.987	0.731896	15.843	0.49269	15.755	0.491582	21.754	0.664194	15.537	0.482653	15.4	0.480841	14.302	0.449235	15.232	0.472725	15.06	0.465322	15.621	0.573164
Unsaturated fat	49.3	1.37129	42.064	1.37346	45.642	1.48518	43.549	1.38478	44.8	1.4524	41.628	1.3355	45.531	1.44488	46.567	1.49489	44.588	1.42067	44.761	1.41723	48.408	1.49138	48.176	1.48278	44.335	1.38007	45.267	1.41539	51.005	1.69784	43.971	1.36742	43.835	1.36772	51.229	1.56413	43.607	1.35464	42.4	1.32387	41.187	1.29371	43.242	1.34201	42.967	1.32759	44.092	1.61782
Fibre	31.4	0.873397	38.8	1.26689	39	1.26905	39.3	1.24967	39.5	1.28058	39.9	1.28006	40.4	1.28206	40.2	1.2905	40.7	1.29679	41.6	1.31714	43.9	1.35249	44.5	1.36964	44.7	1.39143	45	1.40704	38	1.26493	45.6	1.41808	46.1	1.4384	45.9	1.40142	46.4	1.4414	47.3	1.47687	46.6	1.46374	47.3	1.46795	48.4	1.49546	56.4	2.06942
Vitamins (top 5)
A - Retinol/IU	1170.8	32.566	1062	34.6762	1047.3	34.079	1077.3	34.2562	1061	34.3973	1051.4	33.7307	1071.4	33.9999	1059.9	34.0248	1065.5	33.9492	1065.5	33.736	1058.6	32.6138	1057.5	32.5481	1052.7	32.7686	1052.7	32.9153	1003.5	33.4042	1046.8	32.5537	1046.8	32.6619	1055.4	32.2235	1040.9	32.3353	1040.9	32.5005	1054.3	33.1163	1035	32.1212	1035	31.9793	946.5	34.7288
B1 - Thiamine/mg	7.8	0.216959	5.4	0.176319	5.3	0.172461	5.5	0.17489	5.4	0.175066	5.5	0.176449	5.5	0.174537	5.5	0.176561	5.5	0.175242	5.6	0.177308	5.7	0.175608	5.7	0.175437	5.7	0.17743	5.7	0.178225	5.5	0.183082	5.8	0.18037	5.8	0.180969	5.8	0.177086	5.8	0.180175	5.9	0.184218	5.8	0.182182	5.9	0.183106	5.9	0.182297	3.6	0.132091
B2 - Riboflavin/mg	9.2	0.2559	5.8	0.18938	5.5	0.178969	5.8	0.18443	5.7	0.184792	5.8	0.186074	5.8	0.184058	5.7	0.182981	5.8	0.184801	5.8	0.18364	5.8	0.178689	5.8	0.178515	5.8	0.180543	5.8	0.181351	5.6	0.186411	5.8	0.18037	5.8	0.180969	5.8	0.177086	5.8	0.180175	5.8	0.181096	5.8	0.182182	5.8	0.180003	5.7	0.176118	2.4	0.0880605
B3 - Niacin /mg	77.421	2.15348	74.421	2.42998	74.621	2.42815	76.82	2.44274	75.821	2.45809	72.887	2.33834	74.85	2.37529	74.727	2.39888	71.135	2.26652	72.881	2.30757	74.709	2.30167	74.191	2.28348	69.966	2.17791	72.546	2.26833	72.672	2.41908	68.223	2.12162	71.963	2.24536	72.154	2.20301	65.48	2.03412	64.802	2.02334	70.636	2.21872	64.738	2.00914	62.834	1.94144	59.191	2.17183
B6 - Pyridoxine/mg	3.5	0.0973532	4.4	0.143668	3.9	0.126905	4.5	0.143092	4.4	0.142647	4.5	0.144368	4.5	0.142803	4.4	0.141248	4.4	0.140194	4.5	0.14248	4.5	0.138638	4.5	0.138503	4.5	0.140077	4.5	0.140704	3.4	0.113178	4.4	0.136832	4.4	0.137287	4.4	0.134341	4.4	0.136685	4.4	0.137383	4.4	0.138207	4.4	0.136554	4.4	0.135951	5.4	0.198136
B9 - Folic acid/mcg	349.8	9.72976	398.5	13.0117	381.8	12.4237	403	12.8147	403.5	13.0813	406.8	13.0508	411.8	13.0681	408.4	13.1104	413.1	13.1623	420.6	13.3171	439.1	13.528	444	13.6656	445.4	13.8645	447.9	14.0047	396.5	13.1986	451.7	14.0471	456.7	14.2498	453.9	13.8585	457.9	14.2245	465.4	14.5314	458.8	14.4112	464.2	14.4064	474.2	14.6518	528.5	19.3916
B12 - Cobalamin/mcg	6.9	0.191925	8.3	0.27101	6.2	0.201747	8.5	0.270285	8	0.259357	8	0.256654	8.1	0.257046	7.7	0.247185	7.7	0.245339	7.8	0.246965	7.3	0.224902	7	0.215449	7	0.217897	6.9	0.215746	6.7	0.223027	6.7	0.208359	6.6	0.205931	6.4	0.195405	6.3	0.195708	6.2	0.193585	6	0.188464	6	0.18621	5.8	0.179208	7.7	0.282527
C - Ascorbic Acid/mg	66.7	1.85527	90.2	2.94519	90.3	2.93835	90.3	2.87138	90.4	2.93074	90.4	2.90019	90.5	2.87193	90.5	2.90522	90.6	2.88671	90.7	2.87175	91.1	2.80665	91.2	2.80699	91.3	2.842	91.3	2.85472	35.6	1.18504	91.4	2.84238	91.5	2.85495	91.5	2.79368	91.6	2.84553	91.7	2.86319	91.6	2.87722	91.7	2.84591	91.9	2.83951	115.6	4.24158
D - Calciferol/mcg	4.7	0.130731	3.8	0.124077	3.8	0.123651	3.8	0.120833	3.8	0.123195	3.8	0.12191	3.8	0.120589	3.8	0.121987	3.8	0.121076	3.8	0.120316	3.8	0.117072	3.8	0.116958	3.8	0.118287	3.8	0.118816	3.8	0.126493	3.8	0.118173	3.8	0.118566	3.8	0.116022	3.8	0.118046	3.8	0.118649	3.8	0.119361	3.8	0.117933	3.8	0.117412	3	0.110076
E - Tocopherol/mg	5.9	0.16411	6.3	0.205706	6.3	0.205001	6.3	0.200329	6.3	0.204244	6.3	0.202115	6.3	0.199925	6.2	0.199032	6.3	0.200732	6.3	0.199471	6.2	0.191012	6.2	0.190826	6.2	0.192994	6.2	0.193858	6.1	0.203055	6.2	0.192809	6.2	0.19345	6.2	0.189299	6.2	0.192601	6.1	0.190463	6.2	0.194746	6.1	0.189313	6.1	0.188477	6.5	0.238497
K - Phytonadione/mcg	32	0.890087	29.7	0.969757	29.9	0.972941	29.9	0.950767	29.6	0.959623	29.7	0.952826	29.7	0.942501	29.4	0.943797	29.5	0.939934	29.5	0.934033	29.3	0.902688	29.1	0.895651	29	0.902716	29	0.906757	23.6	0.785589	28.8	0.895631	28.8	0.898607	28.8	0.879323	28.6	0.888451	28.6	0.892991	28.7	0.901486	28.4	0.881394	28.4	0.877499	26.5	0.972334
Choline/mg	467.4	13.0008	386.8	12.6297	409	13.3088	405.9	12.9069	376.9	12.219	381.2	12.2295	390.8	12.4017	367	11.7814	369.3	11.7667	375.7	11.8955	355.5	10.9524	345.6	10.637	343.6	10.6956	340.4	10.6435	298.1	9.92305	331.8	10.3184	298.1	9.30121	325.8	9.94734	319.9	9.9376	310.3	9.68864	315.9	9.92263	308	9.55878	295.3	9.12414	243.7	8.94181
Minerals (top 5)
Calcium/mg	4770	132.679	2654.7	86.6806	2650.1	86.2338	2661.7	84.6373	2659.5	86.2201	2663.9	85.4624	2670.5	84.7458	2664.3	85.5292	2670	85.072	2679.2	84.8292	2698.9	83.149	2703.7	83.2155	2705	84.2016	2706.7	84.6317	2674.7	89.0345	2711.1	84.3106	2716.4	84.7561	2713.3	82.8426	2717.1	84.4059	2725.1	85.0871	2718.1	85.3773	2723.2	84.5145	2733.8	84.4686	627.8	23.0352
Copper/mg	4	0.111261	3.8	0.124077	3.6	0.117143	3.8	0.120833	3.8	0.123195	3.8	0.12191	3.8	0.120589	3.8	0.121987	3.8	0.121076	3.9	0.123482	3.9	0.120153	3.9	0.120036	3.9	0.1214	3.9	0.121943	3.5	0.116507	3.9	0.121283	3.9	0.121686	3.9	0.119075	3.9	0.121152	3.9	0.121771	3.9	0.122502	3.9	0.121036	3.9	0.120502	3.7	0.13576
Iron/mg	197	5.4796	109.5	3.57537	109.4	3.55986	110.1	3.50098	109.6	3.5532	109.8	3.52257	110.3	3.50027	109.6	3.51837	109.9	3.50165	110.5	3.49866	111.2	3.4259	111.2	3.42256	111.3	3.46456	111.4	3.4832	109	3.62836	111.4	3.46435	111.6	3.4821	111.3	3.39822	111.5	3.46372	111.8	3.49078	111.4	3.49915	111.6	3.4635	112	3.46056	25.4	0.931973
Magnesium/mg	392.8	10.9258	581.7	18.9935	568.4	18.4956	592.3	18.8341	586.4	19.0109	591.5	18.9763	600.2	19.0468	591	18.9722	597.2	19.0281	608	19.2506	626.5	19.3015	631.2	19.4273	632.3	19.6823	634.4	19.8361	558.1	18.5778	638.1	19.8438	642.3	20.0408	640.5	19.5558	643.9	20.0026	650.2	20.3015	645.2	20.2662	649.7	20.1634	658.1	20.3339	860.3	31.566
Phosphorus/mg	3518	97.8539	3014.4	98.4254	2927.7	95.2668	3075.1	97.7827	3004.7	97.4114	3023.5	96.999	3060.7	97.1284	2995	96.1453	3011.9	95.9657	3046.4	96.4555	3042.1	93.7224	3032.4	93.3324	3030.5	94.3338	3027.8	94.6717	2863.7	95.3259	3018.8	93.8795	2863.7	89.3521	3013	91.993	3007.1	93.4147	2999.2	93.6454	3003.2	94.3325	2995.4	92.9622	2984.8	92.2239	2566.3	94.1623
Potassium/mg	5489	152.678	5813.2	189.811	5564.6	181.071	5954.9	189.355	5865.7	190.164	5925.6	190.103	6046.2	191.87	5918.3	189.989	5994.2	190.988	6137.6	194.329	6357.6	195.868	6410.2	197.296	6426.2	200.036	6449	201.644	5131.7	170.822	6494.7	201.974	5131.7	160.117	6515.3	198.925	6563.3	203.887	6631.7	207.065	6567.9	206.302	6631.8	205.818	6723	207.726	7226.3	265.146
Sodium/mg	859.5	23.9072	611.2	19.9567	793.7	25.8269	790.3	25.1301	613.6	19.8927	624.4	20.0318	756.6	24.01	616	19.7748	627.1	19.9808	722.9	22.8885	664.8	20.4815	667.2	20.5353	667.5	20.778	631.1	19.7329	653.8	21.7635	670.2	20.8421	653.8	20.3996	672	20.5175	672.9	20.9034	563.7	17.6007	674.4	21.1834	675.6	20.9672	530	16.3759	470	17.2452
Selenium/mcg	174.4	4.85097	150.7	4.92062	135.3	4.40264	160.8	5.11315	148.3	4.80784	150	4.81225	155.9	4.94734	145.9	4.68367	146.9	4.68055	151	4.78098	143.9	4.43334	141.5	4.35514	140.8	4.38284	139	4.34618	137.3	4.5704	137.7	4.28223	134.1	4.18414	136.7	4.17373	134.7	4.18442	129.2	4.03407	134.3	4.21845	131.6	4.0842	124.2	3.83751	113.4	4.16086
Zinc/mg	21.7	0.60359	20.9	0.682422	21.2	0.689844	21.6	0.686842	20.3	0.65812	20.4	0.654467	20.8	0.660068	19.6	0.629198	19.7	0.627685	20.1	0.636409	19.2	0.591523	18.5	0.5694	18.5	0.575871	18.4	0.575322	17	0.56589	17.8	0.55355	17.7	0.552269	17.2	0.525151	17.1	0.531207	16.9	0.527676	14.87	0.467077	16.4	0.508974	16.1	0.497456	16.7	0.612754
Food Ingredients (Sum)
Whole grains	50	1.39076	137.5	4.48962	137.5	4.47422	137.5	4.37226	137.5	4.45771	137.5	4.41123	137.5	4.36343	137.5	4.41401	137.5	4.38105	137.5	4.35354	137.5	4.23616	137.5	4.23203	137.5	4.28012	137.5	4.29928	137.5	4.57705	137.5	4.27601	137.5	4.29022	137.5	4.19816	137.5	4.2714	137.5	4.29323	137.5	4.31897	137.5	4.26731	137.5	4.24846	225	8.25567
Nuts and Seeds	0	0	12.5	0.408147	12.5	0.406748	12.5	0.397478	12.5	0.405246	12.5	0.401021	12.5	0.396676	12.5	0.401274	12.5	0.398277	12.5	0.395777	12.5	0.385106	12.5	0.38473	12.5	0.389102	12.5	0.390844	12.5	0.416096	12.5	0.388729	12.5	0.39002	12.5	0.38165	12.5	0.388309	12.5	0.390293	12.5	0.392633	12.5	0.387937	12.5	0.386223	25	0.917297
Beans and legumes	0	0	12	0.391821	15	0.488097	20	0.635964	24	0.778072	30	0.962451	40	1.26936	36	1.15567	45	1.4338	60	1.89973	100	3.08085	112	3.44718	115	3.57974	120	3.7521	124	4.12767	130	4.04278	140	4.36823	136	4.15236	145	4.50438	160	4.99575	148	4.64878	160	4.9656	180	5.56161	200	7.33837
Vegetables, non starchy	250	6.9538	325	10.6118	325	10.5754	325	10.3344	325	10.5364	325	10.4266	325	10.3136	325	10.4331	325	10.3552	325	10.2902	325	10.0128	325	10.003	325	10.1166	325	10.1619	325	10.8185	325	10.1069	325	10.1405	325	9.92291	325	10.096	325	10.1476	325	10.2085	325	10.0864	325	10.0418	400	14.6767
Fruits	200	5.56304	300	9.79552	300	9.76195	300	9.53947	300	9.7259	300	9.62451	300	9.52022	300	9.63058	300	9.55865	300	9.49864	300	9.24254	300	9.23352	300	9.33844	300	9.38024	300	9.9863	300	9.32949	300	9.36049	300	9.15961	300	9.31942	300	9.36704	300	9.4232	300	9.3105	300	9.26936	400	14.6767
Refined grains	150	4.17228	100	3.26517	100	3.25398	100	3.17982	100	3.24197	100	3.20817	100	3.17341	100	3.21019	100	3.18622	100	3.16621	100	3.08085	100	3.07784	100	3.11281	100	3.12675	100	3.32877	100	3.10983	100	3.12016	100	3.0532	100	3.10647	100	3.12235	100	3.14107	100	3.1035	100	3.08979	50	1.83459
Seafood	50	1.39076	125	4.08147	125	4.06748	125	3.97478	125	4.05246	125	4.01021	125	3.96676	125	4.01274	125	3.98277	125	3.95777	125	3.85106	125	3.8473	125	3.89102	125	3.90844	125	4.16096	125	3.88729	125	3.9002	125	3.8165	125	3.88309	125	3.90293	125	3.92633	125	3.87937	125	3.86223	200	7.33837
Processed meats	50	1.39076	25	0.816294	25	0.813495	45	1.43092	25	0.810492	25	0.802042	40	1.26936	25	0.802548	25	0.796555	35	1.10817	25	0.770212	25	0.76946	25	0.778204	20	0.62535	25	0.832192	25	0.777457	15	0.468024	25	0.763301	25	0.776618	10	0.312235	25	0.785267	25	0.775875	5	0.154489	0	0
Red Meats	100	2.78152	88	2.87335	88	2.8635	88	2.79824	76	2.4639	76	2.43821	76	2.41179	64	2.05452	64	2.03918	64	2.02638	50	1.54042	38	1.16958	38	1.18287	38	1.18816	26	0.865479	26	0.808556	26	0.811242	14	0.427449	14	0.434906	14	0.437128	2	0.0628213	2	0.06207	2	0.0617957	0	0
Milk/Dairy	300	8.34456	250	8.16294	250	8.13495	250	7.94956	250	8.10492	250	8.02042	250	7.93351	250	8.02548	250	7.96555	250	7.91553	250	7.70212	250	7.6946	250	7.78204	250	7.81687	250	8.32192	250	7.77457	250	7.80041	250	7.63301	250	7.76618	250	7.80587	250	7.85267	250	7.75875	250	7.72447	200	7.33837
Plant oils	25	0.69538	25	0.816294	25	0.813495	25	0.794956	25	0.810492	25	0.802042	25	0.793351	25	0.802548	25	0.796555	25	0.791553	25	0.770212	25	0.76946	25	0.778204	25	0.781687	25	0.832192	25	0.777457	25	0.780041	25	0.763301	25	0.776618	25	0.780587	25	0.785267	25	0.775875	25	0.772447	25	0.917297
Added sugar, kcal	0	0	0	0	0	0	0	0	0	0	0	0	0	0	0	0	0	0	0	0	0	0	0	0	0	0	0	0	0	0	0	0	0	0	0	0	0	0	0	0	0	0	0	0	0	0	0	0
Specific Lipids
Cholesterol	0.99	0.0275371	0.949	0.0309865	0.958	0.0311731	0.97	0.0308443	0.941	0.0305069	0.947	0.0303814	0.954	0.0302743	0.934	0.0299832	0.938	0.0298867	0.941	0.0297941	0.925	0.0284978	0.918	0.0282546	0.916	0.0285134	0.914	0.0285785	0.91	0.0302918	0.905	0.028144	0.901	0.0281127	0.903	0.04515	0.895	0.0278029	0.89	0.0277889	0.895	0.0281125	0.885	0.027466	0.877	0.0270974	0.595	0.0218317
Alpha-linolelic acid	0.09	0.00250337	0.09	0.00293866	0.09	0.00292858	0.07	0.00222588	0.08	0.00259357	0.08	0.00256654	0.08	0.00253872	0.08	0.00256815	0.08	0.00254897	0.08	0.00253297	0.07	0.00215659	0.07	0.00215449	0.07	0.00217897	0.07	0.00218872	0.07	0.00233014	0.07	0.00217688	0.07	0.00218411	0	0	0	0	0	0	0	0	0	0	0	0	0	0
EPA + DHA	1.5	0.0417228	1.881	0.0614179	1.769	0.0575629	1.83	0.0581907	1.881	0.0609814	1.882	0.0603778	1.79	0.056804	1.881	0.0603837	1.585	0.0505016	1.81	0.0573084	1.88	0.0579199	1.88	0.0578634	1.88	0.0585209	1.88	0.0587829	1.881	0.0626141	1.88	0.0584648	1.79	0.0558509	1.881	0.09405	1.879	0.0583706	1.87	0.0583879	0.694	0.021799	1.879	0.0583147	1.87	0.057779	1.881	0.0690174
Fiber and Protein (g)
Fibre, total	31.4	0.873397	38.8	1.26689	39	1.26905	39.3	1.24967	39.5	1.28058	39.9	1.28006	40.4	1.28206	40.2	1.2905	40.7	1.29679	41.6	1.31714	43.9	1.35249	44.5	1.36964	44.7	1.39143	45	1.40704	38	1.26493	45.6	1.41808	46.1	1.4384	45.9	2.295	46.4	1.4414	47.3	1.47687	46.6	1.46374	47.3	1.46795	48.4	1.49546	56.4	2.06942
Protein	134.8	3.74949	139.2	4.54512	131.6	4.28224	146.1	4.64572	137.3	4.45122	139.6	4.47861	143.2	4.54432	135.3	4.34339	137.2	4.37149	140.4	4.44536	138	4.25157	136	4.18586	135.5	4.21786	135.1	4.22424	128.2	4.26748	133	4.13607	132.3	4.12798	132.2	6.61	130.6	4.05705	129.4	4.04032	130.2	4.08967	128.1	3.97558	126.6	3.91167	141.2	5.18089
Diet Calorie Content	3595.16		3062.62		3073.16		3144.83		3084.55		3117.04		3151.19		3115.08		3138.52		3158.35		3245.86		3249.03		3212.53		3198.21		3004.12		3215.61		3204.96		3275.25		3219.09		3202.72		3183.63		3222.17		3236.47		2725.4

## Sheet: SD1-S8
Table 1 - Food Compass Scoring
Nutrient	Scenarios																																																Daily Value (USDA)
Scenario	S1M1/M2/M3	FCS	S2M1	FCS	S2M2	FCS	S2M3	FCS	S3M1	FCS	S3M2	FCS	S3M3	FCS	S4M1	FCS	S4M2	FCS	S4M3	FCS	S5M1/M2/M3	FCS	S6M1	FCS	S6M2	FCS	S6M3	FCS	S7M1	FCS	S7M2	FCS	S7M3	FCS	S8M1	FCS	S8M2	FCS	S8M3	FCS	S9M1	FCS	S9M2	FCS	S9M3	FCS	S10M1/M2/M3	FCS	Daily Value (USDA)
Nutrient Ratios		1.13447		1.40534		1.44316		1.63003		1.49695		2.03215		1.76429		1.52558		1.88971		1.81391		1.48658		1.49882		1.95643		1.86308		1.57265		1.98039		1.85449		1.74982		2.00368		2.09793		1.67029		2.02805		2.19993		2.4916
Unsaturated:Saturated fat (log)	0.335	-4.29268	0.2813	-4.81659	0.351099	-4.13562	0.394157	-3.71554	0.3072	-4.5639	0.472359	-2.9526	0.422249	-3.44147	0.313778	-4.49973	0.425878	-3.40607	0.423759	-3.42674	0.296549	-4.66781	0.298639	-4.64743	0.438601	-3.28194	0.397983	-3.67821	0.365447	-3.99564	0.443329	-3.23582	0.444403	-3.22534	0.371977	-3.93193	0.448189	-3.1884	0.439845	-3.2698	0.37961	-3.85746	0.453149	-3.14001	0.45531	-3.11893	0.450651	-3.16438
Fibre:Carbohydrate (log)	-1.29243	6.1649	-1.09331	6.75575	-1.09216	6.75916	-1.09027	6.76477	-1.08906	6.76838	-1.08638	6.77633	-1.08399	6.7834	-1.08491	6.7807	-1.08211	6.789	-1.077	6.80415	-1.06476	6.84046	-1.06218	6.84813	-1.06099	6.85165	-1.05944	6.85627	-1.07966	6.79627	-1.05645	6.86512	-1.0543	6.87151	-1.05528	6.86862	-1.05298	6.87543	-1.04851	6.88869	-0.988875	7.06565	-1.04868	6.8882	-1.04375	6.90281	-0.854887	7.46324
Potassium:Sodium (log)	0.80524	1.53121	0.978232	2.27686	0.845778	1.70594	0.877082	1.84087	0.980434	2.28636	0.977269	2.27271	0.902616	1.95093	0.982616	2.29576	0.980394	2.28618	0.92892	2.06431	0.980602	2.28708	0.982616	2.29576	0.983503	2.29958	1.00939	2.41118	0.894816	1.91731	0.986355	2.31187	0.894816	1.91731	0.986565	2.31278	0.989172	2.32402	1.07058	2.6749	0.86822	1.80267	0.991942	2.33596	1.10329	2.81589	1.18682	3.17594
Vitamins (top 5)		5.33675		5.34334		4.91861		5.30377		5.27569		5.2345		5.2195		5.19572		5.1193		5.16594		5.02401		4.98036		4.97119		5.02336		5.01714		4.90982		4.97408		4.8499		4.8205		4.84495		4.92374		4.79402		4.70381		4.66949
A - Retinol, RAE/mcg	9.77959	0.434649	10.4133	0.462812	10.2339	0.454841	10.2872	0.457207	10.3295	0.45909	10.1293	0.450193	10.2102	0.453785	10.2177	0.454119	10.1949	0.453109	10.1309	0.450263	9.79395	0.435287	9.77422	0.43441	9.84042	0.437352	9.88447	0.43931	10.0313	0.445835	9.77588	0.434484	9.80837	0.435927	9.67673	0.430077	9.71029	0.431568	9.75991	0.433774	9.94482	0.441992	9.64601	0.428712	9.60339	0.426817	10.4291	0.463515	5000
B1 - Thiamine/mg	0.216959	7.23195	0.176319	5.87731	0.172461	5.7487	0.17489	5.82967	0.175066	5.83554	0.176449	5.88164	0.174537	5.81791	0.176561	5.88535	0.175242	5.8414	0.177308	5.91026	0.175608	5.85361	0.175437	5.84789	0.17743	5.91435	0.178225	5.94082	0.183082	6.10274	0.18037	6.01234	0.180969	6.03231	0.177086	5.90286	0.180175	6.00585	0.184218	6.14061	0.182182	6.07273	0.183106	6.10355	0.182297	6.07658	0.132091	4.40302	1
B2 - Riboflavin/mg	0.2559	7.87384	0.18938	5.82708	0.178969	5.50674	0.18443	5.67476	0.184792	5.68591	0.186074	5.72535	0.184058	5.66331	0.182981	5.63018	0.184801	5.68617	0.18364	5.65047	0.178689	5.49813	0.178515	5.49276	0.180543	5.55518	0.181351	5.58004	0.186411	5.73572	0.18037	5.54985	0.180969	5.56829	0.177086	5.44879	0.180175	5.54386	0.181096	5.57219	0.182182	5.6056	0.180003	5.53855	0.176118	5.41901	0.0880605	2.70955	1
B3 - Niacin /mg	2.15348	5.3837	2.42998	6.07494	2.42815	6.07038	2.44274	6.10685	2.45809	6.14523	2.33834	5.84585	2.37529	5.93823	2.39888	5.9972	2.26652	5.66629	2.30757	5.76892	2.30167	5.75417	2.28348	5.7087	2.17791	5.44478	2.26833	5.67083	2.41908	6.0477	2.12162	5.30405	2.24536	5.61341	2.20301	5.50752	2.03412	5.08529	2.02334	5.05836	2.21872	5.54681	2.00914	5.02286	1.94144	4.85359	2.17183	5.42957
B6 - Pyridoxine/mg	0.0973532	2.99548	0.143668	4.42054	0.126905	3.90478	0.143092	4.40283	0.142647	4.38913	0.144368	4.44208	0.142803	4.39395	0.141248	4.34611	0.140194	4.31365	0.14248	4.38399	0.138638	4.26579	0.138503	4.26162	0.140077	4.31005	0.140704	4.32934	0.113178	3.4824	0.136832	4.21023	0.137287	4.22422	0.134341	4.13357	0.136685	4.20568	0.137383	4.22718	0.138207	4.25252	0.136554	4.20166	0.135951	4.1831	0.198136	6.09649	1
B9 - Folic acid/mcg	9.72976	0.972976	13.0117	1.30117	12.4237	1.24237	12.8147	1.28147	13.0813	1.30813	13.0508	1.30508	13.0681	1.30681	13.1104	1.31104	13.1623	1.31623	13.3171	1.33171	13.528	1.3528	13.6656	1.36656	13.8645	1.38645	14.0047	1.40047	13.1986	1.31986	14.0471	1.40471	14.2498	1.42498	13.8585	1.38585	14.2245	1.42245	14.5314	1.45314	14.4112	1.44112	14.4064	1.44064	14.6518	1.46518	19.3916	1.93916	400
B12 - Cobalamin/mcg	0.191925	3.19875	0.27101	4.51683	0.201747	3.36245	0.270285	4.50475	0.259357	4.32262	0.256654	4.27756	0.257046	4.2841	0.247185	4.11975	0.245339	4.08898	0.246965	4.11608	0.224902	3.74836	0.215449	3.59081	0.217897	3.63162	0.215746	3.59576	0.223027	3.71712	0.208359	3.47264	0.205931	3.43218	0.195405	3.25675	0.195708	3.2618	0.193585	3.22642	0.188464	3.14107	0.18621	3.1035	0.179208	2.98679	0.282527	4.70879	2
C - Ascorbic Acid/mg	1.85527	0.824566	2.94519	1.30897	2.93835	1.30593	2.87138	1.27617	2.93074	1.30255	2.90019	1.28897	2.87193	1.27641	2.90522	1.29121	2.88671	1.28298	2.87175	1.27634	2.80665	1.2474	2.80699	1.24755	2.842	1.26311	2.85472	1.26876	1.18504	0.526685	2.84238	1.26328	2.85495	1.26887	2.79368	1.24164	2.84553	1.26468	2.86319	1.27253	2.87722	1.27876	2.84591	1.26485	2.83951	1.26201	4.24158	1.88515	90
D - Calciferol/mcg	0.130731	0.348617	0.124077	0.330871	0.123651	0.329737	0.120833	0.322222	0.123195	0.328519	0.12191	0.325095	0.120589	0.321572	0.121987	0.3253	0.121076	0.32287	0.120316	0.320843	0.117072	0.312192	0.116958	0.311888	0.118287	0.315432	0.118816	0.316844	0.126493	0.337315	0.118173	0.315129	0.118566	0.316176	0.116022	0.309391	0.118046	0.314789	0.118649	0.316398	0.119361	0.318295	0.117933	0.314488	0.117412	0.313098	0.110076	0.293535	10
E - Tocopherol/mg	0.16411	0.437626	0.205706	0.548549	0.205001	0.546669	0.200329	0.53421	0.204244	0.544651	0.202115	0.538973	0.199925	0.533132	0.199032	0.530752	0.200732	0.535285	0.199471	0.531924	0.191012	0.509367	0.190826	0.508869	0.192994	0.514652	0.193858	0.516956	0.203055	0.541479	0.192809	0.514158	0.19345	0.515867	0.189299	0.504796	0.192601	0.513603	0.190463	0.507902	0.194746	0.519323	0.189313	0.504836	0.188477	0.502605	0.238497	0.635992	15
K - Phytonadione/mcg	0.890087	0.296696	0.969757	0.323252	0.972941	0.324314	0.950767	0.316922	0.959623	0.319874	0.952826	0.317609	0.942501	0.314167	0.943797	0.314599	0.939934	0.313311	0.934033	0.311344	0.902688	0.300896	0.895651	0.29855	0.902716	0.300905	0.906757	0.302252	0.785589	0.261863	0.895631	0.298544	0.898607	0.299536	0.879323	0.293108	0.888451	0.29615	0.892991	0.297664	0.901486	0.300495	0.881394	0.293798	0.877499	0.2925	0.972334	0.324111	120
Choline/mg	13.0008	0.945515	12.6297	0.918523	13.3088	0.967912	12.9069	0.938683	12.219	0.888653	12.2295	0.889421	12.4017	0.901939	11.7814	0.85683	11.7667	0.85576	11.8955	0.865124	10.9524	0.796539	10.637	0.773601	10.6956	0.777864	10.6435	0.774069	9.92305	0.721677	10.3184	0.75043	9.30121	0.676451	9.94734	0.723443	9.9376	0.722735	9.68864	0.704628	9.92263	0.721646	9.55878	0.695184	9.12414	0.663574	8.94181	0.650313	550
Minerals (top 5)		5.32433		4.61939		4.50288		4.59386		4.56019		4.53379		4.54334		4.48562		4.47092		4.4942		4.33398		4.3011		4.34784		4.35769		4.49066		4.31256		4.25707		4.21342		4.27725		4.27293		4.26957		4.2421		4.18773		2.72549
Calcium/mg	132.679	5.30714	86.6806	3.46722	86.2338	3.44935	84.6373	3.38549	86.2201	3.44881	85.4624	3.4185	84.7458	3.38983	85.5292	3.42117	85.072	3.40288	84.8292	3.39317	83.149	3.32596	83.2155	3.32862	84.2016	3.36807	84.6317	3.38527	89.0345	3.56138	84.3106	3.37242	84.7561	3.39024	82.8426	3.3137	84.4059	3.37624	85.0871	3.40348	85.3773	3.41509	84.5145	3.38058	84.4686	3.37874	23.0352	0.921406	1000
Copper/mg	0.111261	0.00494493	0.124077	0.00551452	0.117143	0.00520637	0.120833	0.00537037	0.123195	0.00547532	0.12191	0.00541824	0.120589	0.00535953	0.121987	0.00542166	0.121076	0.00538117	0.123482	0.0054881	0.120153	0.00534013	0.120036	0.00533492	0.1214	0.00539554	0.121943	0.0054197	0.116507	0.00517808	0.121283	0.00539037	0.121686	0.00540828	0.119075	0.00529222	0.121152	0.00538455	0.121771	0.00541207	0.122502	0.00544452	0.121036	0.0053794	0.120502	0.00535563	0.13576	0.00603377	1
Iron/mg	5.4796	10	3.57537	7.94526	3.55986	7.91079	3.50098	7.77996	3.5532	7.89599	3.52257	7.82793	3.50027	7.77837	3.51837	7.8186	3.50165	7.78145	3.49866	7.77481	3.4259	7.61311	3.42256	7.60568	3.46456	7.69903	3.4832	7.74044	3.62836	8.06301	3.46435	7.69855	3.4821	7.738	3.39822	7.55159	3.46372	7.69715	3.49078	7.7573	3.49915	7.77588	3.4635	7.69668	3.46056	7.69013	0.931973	2.07105	8
Magnesium/mg	10.9258	1.04055	18.9935	1.80891	18.4956	1.76149	18.8341	1.79372	19.0109	1.81056	18.9763	1.80727	19.0468	1.81398	18.9722	1.80688	19.0281	1.8122	19.2506	1.83339	19.3015	1.83824	19.4273	1.85022	19.6823	1.87451	19.8361	1.88915	18.5778	1.76932	19.8438	1.88989	20.0408	1.90865	19.5558	1.86245	20.0026	1.90501	20.3015	1.93348	20.2662	1.93011	20.1634	1.92033	20.3339	1.93656	31.566	3.00629	420
Phosphorus/mg	97.8539	5.59165	98.4254	5.62431	95.2668	5.44382	97.7827	5.58758	97.4114	5.56637	96.999	5.5428	97.1284	5.5502	96.1453	5.49402	95.9657	5.48375	96.4555	5.51174	93.7224	5.35557	93.3324	5.33328	94.3338	5.39051	94.6717	5.40981	95.3259	5.44719	93.8795	5.36454	89.3521	5.10583	91.993	5.25674	93.4147	5.33798	93.6454	5.35117	94.3325	5.39043	92.9622	5.31213	92.2239	5.26994	94.1623	5.3807	700
Potassium/mg	152.678	1.29938	189.811	1.61541	181.071	1.54103	189.355	1.61153	190.164	1.61842	190.103	1.6179	191.87	1.63294	189.989	1.61693	190.988	1.62543	194.329	1.65387	195.868	1.66696	197.296	1.67911	200.036	1.70243	201.644	1.71612	170.822	1.45381	201.974	1.71893	160.117	1.3627	198.925	1.69298	203.887	1.73521	207.065	1.76225	206.302	1.75576	205.818	1.75164	207.726	1.76788	265.146	2.25657	3400
Sodium/mg	23.9072	-0.415777	19.9567	-0.347074	25.8269	-0.449163	25.1301	-0.437046	19.8927	-0.34596	20.0318	-0.348379	24.01	-0.417565	19.7748	-0.343909	19.9808	-0.347492	22.8885	-0.398062	20.4815	-0.356199	20.5353	-0.357136	20.778	-0.361357	19.7329	-0.343181	21.7635	-0.378495	20.8421	-0.362471	20.3996	-0.354776	20.5175	-0.356827	20.9034	-0.363538	17.6007	-0.306099	21.1834	-0.368406	20.9672	-0.364648	16.3759	-0.284798	17.2452	-0.299916	2300
Selenium/mcg	4.85097	3.52798	4.92062	3.57863	4.40264	3.20192	5.11315	3.71866	4.80784	3.49661	4.81225	3.49982	4.94734	3.59806	4.68367	3.40631	4.68055	3.40404	4.78098	3.47708	4.43334	3.22425	4.35514	3.16738	4.38284	3.18752	4.34618	3.16086	4.5704	3.32392	4.28223	3.11435	4.18414	3.04301	4.17373	3.03544	4.18442	3.04321	4.03407	2.93387	4.21845	3.06797	4.0842	2.97033	3.83751	2.79092	4.16086	3.02608	55
Zinc/mg	0.60359	2.19487	0.682422	2.48153	0.689844	2.50852	0.686842	2.49761	0.65812	2.39316	0.654467	2.37988	0.660068	2.40025	0.629198	2.28799	0.627685	2.28249	0.636409	2.31421	0.591523	2.15099	0.5694	2.07055	0.575871	2.09408	0.575322	2.09208	0.56589	2.05778	0.55355	2.01291	0.552269	2.00825	0.525151	1.90964	0.531207	1.93166	0.527676	1.91882	0.467077	1.69846	0.508974	1.85081	0.497456	1.80893	0.612754	2.2282	11
Food Ingredients (Sum)		0.554494		3.30648		3.30748		3.15244		3.39312		3.38205		3.31081		3.46891		3.47921		3.46768		3.64574		3.74674		3.8011		3.86238		4.16528		3.91488		4.01622		3.92419		4.02795		4.18112		4.14382		4.14128		4.29792		7.95246
Whole grains	1.39076	0.706149	4.48962	2.27957	4.47422	2.27176	4.37226	2.21998	4.45771	2.26337	4.41123	2.23977	4.36343	2.2155	4.41401	2.24119	4.38105	2.22445	4.35354	2.21048	4.23616	2.15088	4.23203	2.14878	4.28012	2.1732	4.29928	2.18293	4.57705	2.32397	4.27601	2.17112	4.29022	2.17833	4.19816	2.13158	4.2714	2.16877	4.29323	2.17986	4.31897	2.19293	4.26731	2.1667	4.24846	2.15712	8.25567	4.19176
Nuts and Seeds	0	0	0.408147	0.163993	0.406748	0.163431	0.397478	0.159707	0.405246	0.162828	0.401021	0.16113	0.396676	0.159384	0.401274	0.161232	0.398277	0.160028	0.395777	0.159023	0.385106	0.154736	0.38473	0.154584	0.389102	0.156341	0.390844	0.157041	0.416096	0.167187	0.388729	0.156191	0.39002	0.15671	0.38165	0.153347	0.388309	0.156023	0.390293	0.15682	0.392633	0.15776	0.387937	0.155873	0.386223	0.155185	0.917297	0.36857
Beans and legumes	0	0	0.391821	0.0494723	0.488097	0.0616284	0.635964	0.0802985	0.778072	0.0982415	0.962451	0.121522	1.26936	0.160273	1.15567	0.145918	1.4338	0.181035	1.89973	0.239865	3.08085	0.388996	3.44718	0.43525	3.57974	0.451987	3.7521	0.47375	4.12767	0.52117	4.04278	0.510452	4.36823	0.551544	4.15236	0.524288	4.50438	0.568735	4.99575	0.630777	4.64878	0.586967	4.9656	0.626969	5.56161	0.702224	7.33837	0.926562
Vegetables, non starchy	6.9538	0.297693	10.6118	0.454293	10.5754	0.452735	10.3344	0.442417	10.5364	0.451064	10.4266	0.446361	10.3136	0.441524	10.4331	0.446643	10.3552	0.443307	10.2902	0.440524	10.0128	0.428646	10.003	0.428228	10.1166	0.433094	10.1619	0.435033	10.8185	0.46314	10.1069	0.432679	10.1405	0.434117	9.92291	0.4248	10.096	0.432212	10.1476	0.43442	10.2085	0.437025	10.0864	0.431798	10.0418	0.42989	14.6767	0.628312
Fruits	5.56304	0.148944	9.79552	0.262263	9.76195	0.261364	9.53947	0.255407	9.7259	0.260399	9.62451	0.257684	9.52022	0.254892	9.63058	0.257847	9.55865	0.255921	9.49864	0.254314	9.24254	0.247458	9.23352	0.247216	9.33844	0.250025	9.38024	0.251144	9.9863	0.267371	9.32949	0.249785	9.36049	0.250615	9.15961	0.245237	9.31942	0.249516	9.36704	0.250791	9.4232	0.252295	9.3105	0.249277	9.26936	0.248176	14.6767	0.392952
Refined grains	4.17228	-1.29445	3.26517	-1.01302	3.25398	-1.00955	3.17982	-0.986542	3.24197	-1.00582	3.20817	-0.995337	3.17341	-0.984551	3.21019	-0.995964	3.18622	-0.988526	3.16621	-0.982319	3.08085	-0.955835	3.07784	-0.954902	3.11281	-0.965753	3.12675	-0.970076	3.32877	-1.03275	3.10983	-0.964827	3.12016	-0.968033	3.0532	-0.947259	3.10647	-0.963785	3.12235	-0.96871	3.14107	-0.974518	3.1035	-0.962863	3.08979	-0.958608	1.83459	-0.569184
Seafood	1.39076	0.126333	4.08147	0.370749	4.06748	0.369478	3.97478	0.361058	4.05246	0.368114	4.01021	0.364277	3.96676	0.360329	4.01274	0.364506	3.98277	0.361784	3.95777	0.359513	3.85106	0.34982	3.8473	0.349478	3.89102	0.353449	3.90844	0.355031	4.16096	0.37797	3.88729	0.35311	3.9002	0.354284	3.8165	0.346681	3.88309	0.352729	3.90293	0.354532	3.92633	0.356657	3.87937	0.352392	3.86223	0.350835	7.33837	0.666598
Processed meats	1.39076	-0.218107	0.816294	-0.128016	0.813495	-0.127577	1.43092	-0.224405	0.810492	-0.127106	0.802042	-0.125781	1.26936	-0.199069	0.802548	-0.12586	0.796555	-0.12492	1.10817	-0.17379	0.770212	-0.120789	0.76946	-0.120671	0.778204	-0.122042	0.62535	-0.098071	0.832192	-0.130509	0.777457	-0.121925	0.468024	-0.0733983	0.763301	-0.119705	0.776618	-0.121794	0.312235	-0.0489665	0.785267	-0.12315	0.775875	-0.121677	0.154489	-0.0242279	0	0
Red Meats	2.78152	-0.436214	2.87335	-0.450616	2.8635	-0.449071	2.79824	-0.438837	2.4639	-0.386403	2.43821	-0.382374	2.41179	-0.378231	2.05452	-0.322202	2.03918	-0.319796	2.02638	-0.317788	1.54042	-0.241578	1.16958	-0.18342	1.18287	-0.185504	1.18816	-0.186335	0.865479	-0.13573	0.808556	-0.126802	0.811242	-0.127224	0.427449	-0.067035	0.434906	-0.0682045	0.437128	-0.068553	0.0628213	-0.00985201	0.06207	-0.00973418	0.0617957	-0.00969117	0	0
Milk/Dairy	8.34456	0.609314	8.16294	0.596052	8.13495	0.594009	7.94956	0.580471	8.10492	0.591816	8.02042	0.585646	7.93351	0.5793	8.02548	0.586015	7.96555	0.581639	7.91553	0.577987	7.70212	0.562404	7.6946	0.561854	7.78204	0.568239	7.81687	0.570783	8.32192	0.607661	7.77457	0.567694	7.80041	0.569581	7.63301	0.557357	7.76618	0.567081	7.80587	0.569979	7.85267	0.573397	7.75875	0.566539	7.72447	0.564035	7.33837	0.535843
Plant oils	0.69538	0.614837	0.816294	0.721745	0.813495	0.719271	0.794956	0.702878	0.810492	0.716615	0.802042	0.709145	0.793351	0.70146	0.802548	0.709592	0.796555	0.704292	0.791553	0.69987	0.770212	0.681001	0.76946	0.680336	0.778204	0.688067	0.781687	0.691147	0.832192	0.735802	0.777457	0.687407	0.780041	0.689691	0.763301	0.67489	0.776618	0.686665	0.780587	0.690174	0.785267	0.694312	0.775875	0.686008	0.772447	0.682977	0.917297	0.811049
Additive		0		0		0		0		0		0		0		0		0		0		0		0		0		0		0		0		0		0		0		0		0		0		0		0
Artificial sweeteners	0	0	0	0	0	0	0	0	0	0	0	0	0	0	0	0	0	0	0	0	0	0	0	0	0	0	0	0	0	0	0	0	0	0	0	0	0	0	0	0	0	0	0	0	0	0	0
Specific Lipids		0.0109314		0.0131936		0.0130447		0.0101408		0.0117548		0.0166163		0.00751038		0.0116446		0.0113033		0.0114202		0.00989705		0.00989217		0.010006		0.0100521		0.0107055		0.010004		0.00996511		0.00150467		0.000938707		0.000939479		-4.34165e-05		0.000944705		0.000938608		0.00135532
Cholesterol	0.0275371	-0.00367161	0.0309865	-0.00413153	0.0311731	-0.00415642	0.0308443	-0.00411257	0.0305069	-0.00406759	0.0434117	-0.00578822	0.0199099	-0.00265465	0.0299832	-0.00399776	0.0298867	-0.0039849	0.0297941	-0.00397254	0.0284978	-0.00379971	0.0282546	-0.00376727	0.0285134	-0.00380178	0.0285785	-0.00381046	0.0302918	-0.0040389	0.028144	-0.00375253	0.0281127	-0.00374836	0.04515	-0.00602	0.0278029	-0.00370706	0.0277889	-0.00370518	0.0281125	-0.00374834	0.027466	-0.00366213	0.0270974	-0.00361299	0.0218317	-0.00291089
Alpha-linolelic acid	0.00250337	0.0625842	0.00293866	0.0734664	0.00292858	0.0732146	0.00222588	0.0556469	0.00259357	0.0648394	0.0036673	0.0916825	0.00166959	0.0417398	0.00256815	0.0642038	0.00254897	0.0637244	0.00253297	0.0633242	0.00215659	0.0539148	0.00215449	0.0538622	0.00217897	0.0544743	0.00218872	0.0547181	0.00233014	0.0582534	0.00217688	0.054422	0.00218411	0.0546028	0	0	0	0	0	0	0	0	0	0	0	0	0	0
EPA + DHA	0.0417228	0.00667565	0.0614179	0.00982687	0.0575629	0.00921007	0.0581907	0.00931052	0.0609814	0.00975703	0.0862732	0.0138037	0.0373571	0.00597714	0.0603837	0.0096614	0.0505016	0.00808025	0.0573084	0.00916935	0.0579199	0.00926719	0.0578634	0.00925814	0.0585209	0.00936335	0.0587829	0.00940526	0.0626141	0.0100183	0.0584648	0.00935437	0.0558509	0.00893615	0.09405	0.015048	0.0583706	0.0093393	0.0583879	0.00934206	0.021799	0.00348784	0.0583147	0.00933036	0.057779	0.00924464	0.0690174	0.0110428
Fiber and Protein (g)		0.899393		1.14502		1.09865		1.15845		1.13186		1.13661		1.14887		1.11521		1.12188		1.14043		1.11513		1.10791		1.11936		1.1246		1.09493		1.11176		1.11566		1.7843		1.10379		1.11013		1.11549		1.09623		1.09205		1.46974
Fibre, total	0.873397	0.919366	1.26689	1.33357	1.26905	1.33585	1.24967	1.31544	1.28058	1.34798	1.28006	1.34743	1.28206	1.34953	1.2905	1.35842	1.29679	1.36504	1.31714	1.38647	1.35249	1.42368	1.36964	1.44172	1.39143	1.46466	1.40704	1.48109	1.26493	1.33151	1.41808	1.49272	1.4384	1.5141	2.295	2.41579	1.4414	1.51727	1.47687	1.5546	1.46374	1.54078	1.46795	1.54522	1.49546	1.57416	2.06942	2.17834	25
Protein	3.74949	2.67821	4.54512	3.24652	4.28224	3.05874	4.64572	3.31837	4.45122	3.17944	4.47861	3.199	4.54432	3.24594	4.34339	3.10242	4.37149	3.12249	4.44536	3.17526	4.25157	3.03683	4.18586	2.9899	4.21786	3.01276	4.22424	3.01731	4.26748	3.0482	4.13607	2.95434	4.12798	2.94855	6.61	4.72143	4.05705	2.89789	4.04032	2.88594	4.08967	2.92119	3.97558	2.8397	3.91167	2.79405	5.18089	3.70064	50
Unscaled FCS Score		13.2604		15.8328		15.2838		15.8487		15.8695		16.3357		15.9943		15.8027		16.0923		16.0936		15.6153		15.6448		16.2059		16.2412		16.3514		16.2394		16.2275		16.5231		16.2341		16.508		16.1229		16.3026		16.4824		19.3101
Scaled FCS Score		65.4586		72.3789		70.9021		72.4218		72.4779		73.7319		72.8135		72.298		73.0772		73.0806		71.794		71.8733		73.3828		73.4776		73.774		73.4729		73.4408		74.2362		73.4586		74.1954		73.1593		73.6429		74.1265		81.7338
Normalization values
High Score	26.1
Range	36.8
Normalization Value	100
Normalization multiplier	99

## Sheet: SD1-S9
Table 1: HENI Scoring
Diet Scenario	S1M1/M2/M3	S2M1	S2M2	S2M3	S3M1	S3M2	S3M3	S4M1	S4M2	S4M3	S5M1/M2/M3	S6M1	S6M2	S6M3	S7M1	S7M2	S7M3	S8M1	S8M2	S8M3	S9M1	S9M2	S9M3	S10M1/M2/M3
Calcium	0.132679	0.0866806	0.0862338	0.0846373	0.0862201	0.0854624	0.0847458	0.0855292	0.085072	0.0848292	0.083149	0.0832155	0.0842016	0.0846317	0.0890345	0.0843106	0.0847561	0.0828426	0.0844059	0.0850871	0.0853773	0.0845145	0.0844686	0.0230352
PUFA	1.37129	1.37346	1.48518	1.38478	1.4524	1.3355	1.44488	1.49489	1.42067	1.41723	1.49138	1.48278	1.38007	1.41539	1.69784	1.36742	1.36772	1.56413	1.35464	1.32387	1.29371	1.34201	1.32759	1.61782
Sodium	0.0239072	0.0199567	0.0258269	0.0251301	0.0198927	0.0200318	0.02401	0.0197748	0.0199808	0.0228885	0.0204815	0.0205353	0.020778	0.0197329	0.0217635	0.0208421	0.0203996	0.0205175	0.0209034	0.0176007	0.0211834	0.0209672	0.0163759	0.0172452
TFA	0.0228085	0.0259255	0.0258366	0.0252478	0.0248659	0.0238659	0.0237659	0.0237875	0.0236099	0.0234616	0.021874	0.0210524	0.0212916	0.021387	0.02187	0.0204316	0.0204995	0.0192657	0.0196018	0.019702	0.018972	0.0187451	0.0186623	0.0147501
Whole grains	1.39076	4.48962	4.47422	4.37226	4.45771	4.41123	4.36343	4.41401	4.38105	4.35354	4.23616	4.23203	4.28012	4.29928	4.57705	4.27601	4.29022	4.19816	4.2714	4.29323	4.31897	4.26731	4.24846	8.25567
Nuts and Seeds	0	0.408147	0.406748	0.397478	0.405246	0.401021	0.396676	0.401274	0.398277	0.395777	0.385106	0.38473	0.389102	0.390844	0.416096	0.388729	0.39002	0.38165	0.388309	0.390293	0.392633	0.387937	0.386223	0.917297
Beans and legumes	0	0.391821	0.488097	0.635964	0.778072	0.962451	1.26936	1.15567	1.4338	1.89973	3.08085	3.44718	3.57974	3.7521	4.12767	4.04278	4.36823	4.15236	4.50438	4.99575	4.64878	4.9656	5.56161	7.33837
Vegetables, non starchy	6.9538	10.6118	10.5754	10.3344	10.5364	10.4266	10.3136	10.4331	10.3552	10.2902	10.0128	10.003	10.1166	10.1619	10.8185	10.1069	10.1405	9.92291	10.096	10.1476	10.2085	10.0864	10.0418	14.6767
Fruits	5.56304	9.79552	9.76195	9.53947	9.7259	9.62451	9.52022	9.63058	9.55865	9.49864	9.24254	9.23352	9.33844	9.38024	9.9863	9.32949	9.36049	9.15961	9.31942	9.36704	9.4232	9.3105	9.26936	14.6767
Seafood	1.39076	4.08147	4.06748	3.97478	4.05246	4.01021	3.96676	4.01274	3.98277	3.95777	3.85106	3.8473	3.89102	3.90844	4.16096	3.88729	3.9002	3.8165	3.88309	3.90293	3.92633	3.87937	3.86223	7.33837
Processed meats	1.39076	0.816294	0.813495	1.43092	0.810492	0.802042	1.26936	0.802548	0.796555	1.10817	0.770212	0.76946	0.778204	0.62535	0.832192	0.777457	0.468024	0.763301	0.776618	0.312235	0.785267	0.775875	0.154489	0
Red Meats	2.78152	2.87335	2.8635	2.79824	2.4639	2.43821	2.41179	2.05452	2.03918	2.02638	1.54042	1.16958	1.18287	1.18816	0.865479	0.808556	0.811242	0.427449	0.434906	0.437128	0.0628213	0.06207	0.0617957	0
Milk/Dairy	8.34456	8.16294	8.13495	7.94956	8.10492	8.02042	7.93351	8.02548	7.96555	7.91553	7.70212	7.6946	7.78204	7.81687	8.32192	7.77457	7.80041	7.63301	7.76618	7.80587	7.85267	7.75875	7.72447	7.33837
Fiber(l,v,f,w)	0.873397	1.26689	1.26905	1.24967	1.28058	1.28006	1.28206	1.2905	1.29679	1.31714	1.35249	1.36964	1.39143	1.40704	1.26493	1.41808	1.4384	2.295	1.4414	1.47687	1.46374	1.46795	1.49546	2.06942
Sugar-Sweetened Beverages	13.9076	8.16295	8.13495	7.94956	8.10491	8.02558	7.93351	8.02548	7.96554	7.91553	7.70212	7.6946	7.78203	7.81687	8.3219	7.77457	7.80041	7.63301	7.76617	7.80587	7.85267	7.75875	7.72447	0
HENI Score	60.2136	177.616	177.013	172.69	176.454	174.606	172.546	174.814	173.523	172.33	168.057	167.958	169.841	170.71	181.732	169.756	170.504	166.869	169.649	170.803	171.548	169.564	169.207	320.847
Dietary Risk		Dietary Risk Factor**
Calcium		-5.1
PUFA		-0.6
Sodium		13.9
TFA		4.4
Whole grains		-0.34
Nuts and Seeds		-1.5
Beans and legumes		-0.23
Vegetables		-0.083
Fruits		-0.18
Seafood		-81
Processed meats		0.86
Red Meats		0.099
Milk/Dairy		-0.0077
Fibre		-0.19
Sugar-Sweetened Beverages		0.066
**Dietary Risk Factors are adapted from Stylianou et al. (2021)

## Sheet: SD1-S10
Table 1: Calculation of Percentage Contribution of Food Compass Domains to Nutritional Quality
Diet Scenario	S1M1/M2/M3		S2M1		S2M2		S2M3		S3M1		S3M2		S3M3		S4M1		S4M2		S4M3		S5/M1/M2/M3		S6M1		S6M2		S6M3		S7M1		S7M2		S7M3		S8M1		S8M2		S8M3		S9M1		S9M2		S9M3		S10M1/M2/M3
	Domain Score	%Cont.	Domain Score	%Cont.	Domain Score	%Cont.	Domain Score	%Cont.	Domain Score	%Cont.	Domain Score	%Cont.	Domain Score	%Cont.	Domain Score	%Cont.	Domain Score	%Cont.	Domain Score	%Cont.	Domain Score	%Cont.	Domain Score	%Cont.	Domain Score	%Cont.	Domain Score	%Cont.	Domain Score	%Cont.	Domain Score	%Cont.	Domain Score	%Cont.	Domain Score	%Cont.	Domain Score	%Cont.	Domain Score	%Cont.	Domain Score	%Cont.	Domain Score	%Cont.	Domain Score	%Cont.	Domain Score	%Cont.
Nutrient Ratios	1.13447	8.55537	1.40534	8.87615	1.44316	9.44241	1.63003	10.285	1.49695	9.43282	2.03215	12.4399	1.76429	11.0307	1.52558	9.65391	1.88971	11.7429	1.81391	11.271	1.48658	9.51998	1.49882	9.5803	1.95643	12.0723	1.86308	11.4713	1.57265	9.61784	1.98039	12.195	1.85449	11.4281	1.74982	10.5901	2.00368	12.3424	2.09793	12.7086	1.67029	10.3598	2.02805	12.44	2.19993	13.3471	2.4916	12.9031
Vitamins (top 5)	5.33675	40.2458	5.34334	33.7486	4.91861	32.1818	5.30377	33.465	5.27569	33.2441	5.2345	32.0433	5.2195	32.6335	5.19572	32.8787	5.1193	31.812	5.16594	32.0994	5.02401	32.1736	4.98036	31.8339	4.97119	30.6752	5.02336	30.9298	5.01714	30.6833	4.90982	30.234	4.97408	30.6522	4.8499	29.3522	4.8205	29.6936	4.84495	29.3491	4.92374	30.5389	4.79402	29.4064	4.70381	28.5384	4.66949	24.1815
Minerals (top 5)	5.32433	40.1522	4.61939	29.1761	4.50288	29.4618	4.59386	28.9857	4.56019	28.7355	4.53379	27.7539	4.54334	28.406	4.48562	28.3852	4.47092	27.783	4.4942	27.9254	4.33398	27.7546	4.3011	27.4922	4.34784	26.8287	4.35769	26.8312	4.49066	27.4635	4.31256	26.5561	4.25707	26.2337	4.21342	25.5001	4.27725	26.3473	4.27293	25.884	4.26957	26.4814	4.2421	26.021	4.18773	25.4073	2.72549	14.1143
Food Ingredients (Sum)	0.554494	4.18159	3.30648	20.8838	3.30748	21.6404	3.15244	19.8908	3.39312	21.3813	3.38205	20.7034	3.31081	20.6999	3.46891	21.9514	3.47921	21.6203	3.46768	21.547	3.64574	23.3472	3.74674	23.9487	3.8011	23.455	3.86238	23.7814	4.16528	25.4736	3.91488	24.1073	4.01622	24.7495	3.92419	23.7496	4.02795	24.8117	4.18112	25.3278	4.14382	25.7015	4.14128	25.4025	4.29792	26.0758	7.95246	41.1828
Specific Lipids	0.0109314	0.0824364	0.0131936	0.0833311	0.0130447	0.0853498	0.0101408	0.0639851	0.0117548	0.0740714	0.0166163	0.101718	0.00751038	0.0469566	0.0116446	0.0736874	0.0113033	0.0702402	0.0114202	0.0709611	0.00989705	0.0633803	0.00989217	0.0632297	0.010006	0.0617426	0.0100521	0.061893	0.0107055	0.0654714	0.010004	0.061603	0.00996511	0.0614088	0.00150467	0.00910642	0.000938707	0.00578231	0.000939479	0.00569105	-4.34165e-05	-0.000269285	0.000944705	0.0057948	0.000938608	0.00569462	0.00135532	0.00701868
Fiber and Protein (g)	0.899393	6.78257	1.14502	7.23197	1.09865	7.1883	1.15845	7.30946	1.13186	7.13225	1.13661	6.95782	1.14887	7.18298	1.11521	7.0571	1.12188	6.97155	1.14043	7.08625	1.11513	7.14124	1.10791	7.08162	1.11936	6.90707	1.1246	6.92439	1.09493	6.69624	1.11176	6.84608	1.11566	6.87514	1.7843	10.7988	1.10379	6.7992	1.11013	6.72483	1.11549	6.9187	1.09623	6.72425	1.09205	6.62558	1.46974	7.61126
	13.2604	100	15.8328	100	15.2838	100	15.8487	100	15.8695	100	16.3357	100	15.9943	100	15.8027	100	16.0923	100	16.0936	100	15.6153	100	15.6448	100	16.2059	100	16.2412	100	16.3514	100	16.2394	100	16.2275	100	16.5231	100	16.2341	100	16.508	100	16.1229	100	16.3026	100	16.4824	100	19.3101	100
Table 2: Domain Contributions to Food Compass Scores of Diet Scenarios
Diet Scenario	S1M1/M2/M3	S2M1	S2M2	S2M3	S3M1	S3M2	S3M3	S4M1	S4M2	S4M3	S5/M1/M2/M3	S6M1	S6M2	S6M3	S7M1	S7M2	S7M3	S8M1	S8M2	S8M3	S9M1	S9M2	S9M3	S10M1/M2/M3
Nutrient Ratios	8.55537	8.87615	9.44241	10.285	9.43282	12.4399	11.0307	9.65391	11.7429	11.271	9.51998	9.5803	12.0723	11.4713	9.61784	12.195	11.4281	10.5901	12.3424	12.7086	10.3598	12.44	13.3471	12.9031	10.9711	1.41383
Vitamins (top 5)	40.2458	33.7486	32.1818	33.465	33.2441	32.0433	32.6335	32.8787	31.812	32.0994	32.1736	31.8339	30.6752	30.9298	30.6833	30.234	30.6522	29.3522	29.6936	29.3491	30.5389	29.4064	28.5384	24.1815	31.3581	2.77463
Minerals (top 5)	40.1522	29.1761	29.4618	28.9857	28.7355	27.7539	28.406	28.3852	27.783	27.9254	27.7546	27.4922	26.8287	26.8312	27.4635	26.5561	26.2337	25.5001	26.3473	25.884	26.4814	26.021	25.4073	14.1143	27.32	4.00978
Food Ingredients (Sum)	4.18159	20.8838	21.6404	19.8908	21.3813	20.7034	20.6999	21.9514	21.6203	21.547	23.3472	23.9487	23.455	23.7814	25.4736	24.1073	24.7495	23.7496	24.8117	25.3278	25.7015	25.4025	26.0758	41.1828
Specific Lipids	0.0824364	0.0833311	0.0853498	0.0639851	0.0740714	0.101718	0.0469566	0.0736874	0.0702402	0.0709611	0.0633803	0.0632297	0.0617426	0.061893	0.0654714	0.061603	0.0614088	0.00910642	0.00578231	0.00569105	-0.000269285	0.0057948	0.00569462	0.00701868	0.0512619	0.0318033
Fiber and Protein (g)	6.78257	7.23197	7.1883	7.30946	7.13225	6.95782	7.18298	7.0571	6.97155	7.08625	7.14124	7.08162	6.90707	6.92439	6.69624	6.84608	6.87514	10.7988	6.7992	6.72483	6.9187	6.72425	6.62558	7.61126	7.14894	0.809729
Scaled FCS Score	65.4586	72.3789	70.9021	72.4218	72.4779	73.7319	72.8135	72.298	73.0772	73.0806	71.794	71.8733	73.3828	73.4776	73.774	73.4729	73.4408	74.2362	73.4586	74.1954	73.1595	73.6429	74.1265	81.7338
Food Ingredients (Sum)	4.18159	20.8838	21.6404	19.8908	21.3813	28.5172	13.4611	21.9514	21.6203	21.547	23.3472	23.9487	23.455	23.7814	25.4736	24.1073	24.7495	23.7496	24.8117	25.3278	25.7015	25.4025	26.0758	41.1828

[truncated: 1 more sheets: SD1-S11]
